# Supplementary material for: New Azaphilones from the Marine-Derived Fungus Penicillium sclerotiorum E23Y-1A with Their Anti-Inflammatory and Antitumor Activities
Source: MDPI journal article supplement (doi:10.3390/md21020075), 2023-01-22

# Supporting Information

## New Azaphilones from the Marine-Derived Fungus *Penicillium sclerotiorum* E23Y-1A with Their Anti-Inflammatory and Antitumor Activities

Yanbo Zeng <sup>1,2,3,†,\*</sup>, Zhi Wang <sup>1,2,†</sup>, Wenjun Chang <sup>1,3</sup>, Weibo Zhao <sup>1,2</sup>, Hao Wang <sup>1</sup>, Huiqin Chen <sup>1</sup>, Haofu Dai <sup>1,\*</sup>, and Fang Lv <sup>2,\*</sup>

<sup>1</sup> Hainan Provincial Key Laboratory for Functional Components Research and Utilization of Marine Bio-resources, Institute of Tropical Bioscience and Biotechnology, Chinese Academy of Tropical Agricultural Sciences & Key Laboratory for Biology and Genetic Resources of Tropical Crops of Hainan Province, Hainan Institute for Tropical Agricultural Resources, Haikou 571101, China; 13269326329@163.com (Z.W.); changwenjun@itbb.org.cn (W.C.); zwb1175642690@163.com (W.Z.); wanghao@itbb.org.cn (H.W.); chenhuiqin@itbb.org.cn (H.C.)

<sup>2</sup> Beijing Key Laboratory for Separation and Analysis in Biomedicine and Pharmaceuticals, School of Life Science, Beijing Institute of Technology, Beijing, 100081, China;

<sup>3</sup> Zhanjiang Experimental Station of Chinese Academy of Tropical Agricultural Sciences, Zhanjiang, 524013, China

---

\*Corresponding authors: zengyanbo@itbb.org.cn (Y.Z.); daihaofu@itbb.org.cn (H.D.); lvfangbeijing@bit.edu.cn (F.L.)

† These authors contributed equally to this work.

**Figure S1.** The results of the DP4+ analysis of **1**

**Table S1.** Experimental and calculated  $^{13}\text{C}$  NMR chemical shifts of **1**

**Table S2.** Experimental and calculated  $^1\text{H}$  NMR chemical shifts of **1**

**Figure S2.** Key MOs in important transitions of most populated conformer of **1**

**Figure S3.** Linear regression analysis between experimental and calculated  $^{13}\text{C}$  and  $^1\text{H}$  NMR chemical shifts of isomers of **2**

**Figure S4.** The results of the DP4+ analysis of **2**

**Table S3.** Experimental and calculated  $^{13}\text{C}$  NMR chemical shifts of **2**

**Table S4.** Experimental and calculated  $^1\text{H}$  NMR chemical shifts of **2**

**Figure S5.** Linear regression analysis between experimental and calculated  $^{13}\text{C}$  and  $^1\text{H}$  NMR chemical shifts of isomers of **3**

**Figure S6.** The results of the DP4+ analysis of **3**

**Table S5.** Experimental and calculated  $^{13}\text{C}$  NMR chemical shifts of **3**

**Table S6.** Experimental and calculated  $^1\text{H}$  NMR chemical shifts of **3**

**Figure S7.** Linear regression analysis between experimental and calculated  $^{13}\text{C}$  and  $^1\text{H}$  NMR chemical shifts of isomers of **4**

**Figure S8.** The results of the DP4+ analysis of **4**

**Table S7.** Experimental and calculated  $^{13}\text{C}$  NMR chemical shifts of **4**

**Table S8.** Experimental and calculated  $^1\text{H}$  NMR chemical shifts of **4**

**Figure S9.**  $^1\text{H}$ - $^1\text{H}$  COSY and key HMBC correlations of compound **2**

**Figure S10.** The key NOESY correlations of compound **2**

**Figure S11.**  $^1\text{H}$ - $^1\text{H}$  COSY and key HMBC correlations of compound **3**

**Figure S12.** The key NOESY correlations of compound **3**

**Figure S13.**  $^1\text{H}$ - $^1\text{H}$  COSY and key HMBC correlations of compound **5**

**Figure S14.** The key NOESY correlations of compound **5**

**Figure S15.**  $^1\text{H}$ - $^1\text{H}$  COSY and key HMBC correlations of compound **7**

**Figure S16.** The key NOESY correlations of compound **7**

**Figure S17.**  $^1\text{H}$ - $^1\text{H}$  COSY and key HMBC correlations of compound **8**

**Figure S18.** The key NOESY correlations of compound **8**

**Figure S19.**  $^1\text{H}$  NMR (600 MHz,  $\text{CDCl}_3$ ) spectrum of compound **1**

**Figure S20.**  $^{13}\text{C}$  NMR (125 MHz,  $\text{CDCl}_3$ ) spectrum of compound **1**

**Figure S21.** DEPT spectrum of compound **1**

**Figure S22.** HSQC spectrum of compound **1**

**Figure S23.** HMBC spectrum of compound **1**

**Figure S24.**  $^1\text{H}$ - $^1\text{H}$  COSY spectrum of compound **1**

**Figure S25.** NOESY spectrum of compound **1**

**Figure S26.** HRESIMS spectrum of compound **1**

**Figure S27.** UV spectrum of compound **1**

**Figure S28.** IR spectrum of compound **1**

**Figure S29.**  $^1\text{H}$  NMR (600 MHz,  $\text{CDCl}_3$ ) spectrum of compound **2**

**Figure S30.**  $^{13}\text{C}$  NMR (125 MHz,  $\text{CDCl}_3$ ) spectrum of compound **2**

**Figure S31.** DEPT spectrum of compound **2**

**Figure S32.** HSQC spectrum of compound **2**

**Figure S33.** HMBC spectrum of compound **2**

**Figure S34.**  $^1\text{H}$ - $^1\text{H}$  COSY spectrum of compound **1**

**Figure S35.** NOESY spectrum of compound **2**

**Figure S36.** HRESIMS spectrum of compound **2**

**Figure S37.** UV spectrum of compound **2**

**Figure S38.** IR spectrum of compound **2**

**Figure S39.**  $^1\text{H}$  NMR (400 MHz,  $\text{CDCl}_3$ ) spectrum of compound **3**

**Figure S40.**  $^{13}\text{C}$  NMR (125 MHz,  $\text{CDCl}_3$ ) spectrum of compound **3**

**Figure S41.** DEPT spectrum of compound **3**

**Figure S42.** HSQC spectrum of compound **3**

**Figure S43.** HMBC spectrum of compound **3**

**Figure S44.**  $^1\text{H}$ - $^1\text{H}$  COSY spectrum of compound **3**

**Figure S45.** ROESY spectrum of compound **3**

**Figure S46.** HRESIMS spectrum of compound **3**

**Figure S47.** UV spectrum of compound **3**

**Figure S48.** IR spectrum of compound **3**

**Figure S49.**  $^1\text{H}$  NMR (600 MHz,  $\text{CDCl}_3$ ) spectrum of compound **4**

**Figure S50.**  $^{13}\text{C}$  NMR (125 MHz,  $\text{CDCl}_3$ ) spectrum of compound **4**

**Figure S51.** DEPT spectrum of compound **4**

**Figure S52.** HSQC spectrum of compound **4**

**Figure S53.** HMBC spectrum of compound **4**

**Figure S54.**  $^1\text{H}$ - $^1\text{H}$  COSY spectrum of compound **4**

**Figure S55.** NOESY spectrum of compound **4**

**Figure S56.** HRESIMS spectrum of compound **4**

**Figure S57.** UV spectrum of compound **4**

**Figure S58.** IR spectrum of compound **4**

**Figure S59.**  $^1\text{H}$  NMR (600 MHz,  $\text{CDCl}_3$ ) spectrum of compound **5**

**Figure S60.**  $^{13}\text{C}$  NMR (125 MHz,  $\text{CDCl}_3$ ) spectrum of compound **5**

**Figure S61.** DEPT spectrum of compound **5**

**Figure S62.** HSQC spectrum of compound **5**

**Figure S63.** HMBC spectrum of compound **5**

**Figure S64.**  $^1\text{H}$ - $^1\text{H}$  COSY spectrum of compound **5**

**Figure S65.** NOESY spectrum of compound **5**

**Figure S66.** HRESIMS spectrum of compound **5**

**Figure S67.** UV spectrum of compound **5**

**Figure S68.** IR spectrum of compound **5**

**Figure S69.**  $^1\text{H}$  NMR (600 MHz,  $\text{CDCl}_3$ ) spectrum of compound **6**

**Figure S70.**  $^{13}\text{C}$  NMR (125 MHz,  $\text{CDCl}_3$ ) spectrum of compound **6**

**Figure S71.** DEPT spectrum of compound **6**

**Figure S72.** HSQC spectrum of compound **6**

**Figure S73.** HMBC spectrum of compound **6**

**Figure S74.**  $^1\text{H}$ - $^1\text{H}$  COSY spectrum of compound **6**

**Figure S75.** NOESY spectrum of compound **6**

**Figure S76.** HRESIMS spectrum of compound **6**

**Figure S77.** UV spectrum of compound **6**

**Figure S78.** IR spectrum of compound **6**

**Figure S79.**  $^1\text{H}$  NMR (600 MHz,  $\text{CDCl}_3$ ) spectrum of compound **7**



**Figure S80.**  $^{13}\text{C}$  NMR (125 MHz,  $\text{CDCl}_3$ ) spectrum of compound **7**

**Figure S81.** DEPT spectrum of compound **7**

**Figure S82.** HSQC spectrum of compound **7**

**Figure S83.** HMBC spectrum of compound **7**

**Figure S84.**  $^1\text{H}$ - $^1\text{H}$  COSY spectrum of compound **7**

**Figure S85.** NOESY spectrum of compound **7**

**Figure S86.** HRESIMS spectrum of compound **7**

**Figure S87.** UV spectrum of compound **7**

**Figure S88.** IR spectrum of compound **7**

**Figure S89.**  $^1\text{H}$  NMR (600 MHz,  $\text{CDCl}_3$ ) spectrum of compound **8**

**Figure S90.**  $^{13}\text{C}$  NMR (125 MHz,  $\text{CDCl}_3$ ) spectrum of compound **8**

**Figure S91.** DEPT spectrum of compound **8**

**Figure S92.** HSQC spectrum of compound **8**

**Figure S93.** HMBC spectrum of compound **8**

**Figure S94.**  $^1\text{H}$ - $^1\text{H}$  COSY spectrum of compound **8**

**Figure S95.** NOESY spectrum of compound **8**

**Figure S96.** HRESIMS spectrum of compound **8**

**Figure S97.** UV spectrum of compound **8**

**Figure S98.** IR spectrum of compound **8**

**Figure S99.**  $^1\text{H}$  NMR (600 MHz,  $\text{CDCl}_3$ ) spectrum of compound **9**

**Figure S100.**  $^{13}\text{C}$  NMR (125 MHz,  $\text{CDCl}_3$ ) spectrum of compound **9**

**Figure S101.** DEPT spectrum of compound **9**

**Figure S102.** HSQC spectrum of compound **9**

**Figure S103.** HMBC spectrum of compound **9**

**Figure S104.**  $^1\text{H}$ - $^1\text{H}$  COSY spectrum of compound **9**

**Figure S105.** NOESY spectrum of compound **9**

**Figure S106.** HRESIMS spectrum of compound **9**

**Figure S107.** UV spectrum of compound **9**

**Figure S108.** IR spectrum of compound **9**

**Figure S1.** The results of the DP4+ analysis of **1**

| Functional       |      | Solvent?     | Basis Set   |          |          | Type of Data    |          |
|------------------|------|--------------|-------------|----------|----------|-----------------|----------|
| mPW1PW91         |      | PCM          | 6-31+G(d,p) |          |          | Unscaled Shifts |          |
|                  |      | DP4+         | 91.85%      | 8.13%    | 0.00%    | 0.01%           | –        |
| Nuclei           | sp2? | Experimental | Isomer 1    | Isomer 2 | Isomer 3 | Isomer 4        | Isomer 5 |
| C                | x    | 125          | 123.8       | 124.8    | 124.5    | 123.3           |          |
| C                | x    | 139.5        | 143.4       | 146.1    | 142.5    | 143.1           |          |
| C                |      | 80.4         | 82.4        | 83.2     | 83.0     | 83.7            |          |
| C                |      | 79.5         | 79.6        | 81.0     | 85.5     | 84.9            |          |
| C                |      | 35.4         | 39.8        | 40.6     | 38.6     | 38.8            |          |
| C                |      | 29           | 29.7        | 31.1     | 27.4     | 29.1            |          |
| C                |      | 11.9         | 13.4        | 13.6     | 14.4     | 12.0            |          |
| C                |      | 16.4         | 16.8        | 20.0     | 18.7     | 15.9            |          |
| C                |      | 14           | 17.3        | 15.9     | 20.8     | 17.6            |          |
| C                |      | 50.4         | 50.9        | 52.2     | 51.9     | 50.6            |          |
| H                | x    | 6            | 6.4         | 6.4      | 6.4      | 6.5             |          |
| H                | x    | 6.31         | 7.14        | 7.18     | 7.16     | 6.90            |          |
| H                |      | 3.39         | 3.38        | 3.53     | 3.56     | 3.25            |          |
| H                |      | 1.53         | 1.53        | 1.46     | 1.16     | 1.47            |          |
| H                |      | 1.38         | 1.52        | 1.55     | 1.55     | 1.82            |          |
| H                |      | 1.24         | 1.04        | 1.14     | 1.01     | 1.24            |          |
| H                |      | 0.85         | 0.82        | 0.86     | 0.71     | 0.83            |          |
| H                |      | 1.29         | 1.27        | 1.47     | 1.25     | 1.25            |          |
| H                |      | 0.9          | 0.96        | 1.01     | 0.99     | 0.65            |          |
| H                |      | 3.16         | 3.22        | 3.39     | 3.30     | 3.25            |          |
|                  |      |              | Isomer 1    | Isomer 2 | Isomer 3 | Isomer 4        | Isomer 5 |
| sDP4+ (H data)   |      |              | 32.31%      | 41.14%   | 6.83%    | 19.72%          | –        |
| sDP4+ (C data)   |      |              | 42.52%      | 55.10%   | 1.52%    | 0.86%           | –        |
| sDP4+ (all data) |      |              | 37.45%      | 61.81%   | 0.28%    | 0.46%           | –        |
| uDP4+ (H data)   |      |              | 94.52%      | 0.43%    | 0.08%    | 4.96%           | –        |
| uDP4+ (C data)   |      |              | 7.28%       | 85.10%   | 5.95%    | 1.67%           | –        |
| uDP4+ (all data) |      |              | 93.78%      | 5.03%    | 0.07%    | 1.13%           | –        |
| DP4+ (H data)    |      |              | 96.33%      | 0.56%    | 0.02%    | 3.09%           | –        |
| DP4+ (C data)    |      |              | 6.18%       | 93.61%   | 0.18%    | 0.03%           | –        |
| DP4+ (all data)  |      |              | 91.85%      | 8.13%    | 0.00%    | 0.01%           | –        |

**Table S1.** Experimental and calculated  $^{13}\text{C}$  NMR chemical shifts of **1**

| No.                  | Experimental<br>( $\delta_{\text{C}}$ , ppm) | Calculated ( $\delta_{\text{C}}$ , ppm) |                      |                      |                      |
|----------------------|----------------------------------------------|-----------------------------------------|----------------------|----------------------|----------------------|
|                      |                                              | (11R, 12R,<br>13S)-1                    | (11S, 12R,<br>13S)-1 | (11R, 12S,<br>13S)-1 | (11S, 12S,<br>13S)-1 |
| 9                    | 125                                          | 123.8                                   | 124.8                | 124.5                | 123.3                |
| 10                   | 139.5                                        | 143.4                                   | 146.1                | 142.5                | 143.1                |
| 11                   | 80.4                                         | 82.4                                    | 83.2                 | 83.0                 | 83.7                 |
| 12                   | 79.5                                         | 79.6                                    | 81.0                 | 85.5                 | 84.9                 |
| 13                   | 35.4                                         | 39.8                                    | 40.6                 | 38.6                 | 38.8                 |
| 14                   | 29.0                                         | 29.7                                    | 31.1                 | 27.4                 | 29.1                 |
| 15                   | 11.9                                         | 13.4                                    | 13.6                 | 14.4                 | 12.0                 |
| 17                   | 16.4                                         | 16.8                                    | 20.0                 | 18.7                 | 15.9                 |
| 18                   | 14.0                                         | 17.3                                    | 15.9                 | 20.8                 | 17.6                 |
| OCH3                 | 50.4                                         | 50.9                                    | 52.2                 | 51.9                 | 50.6                 |
| <b>R<sup>2</sup></b> |                                              | <b>0.9985</b>                           | <b>0.9982</b>        | <b>0.9966</b>        | <b>0.9975</b>        |
| <b>MAE</b>           |                                              | <b>1.78</b>                             | <b>2.73</b>          | <b>3.00</b>          | <b>2.21</b>          |
| <b>CMAE</b>          |                                              | <b>1.51</b>                             | <b>1.44</b>          | <b>1.86</b>          | <b>2.01</b>          |

**Table S2.** Experimental and calculated  $^1\text{H}$  NMR chemical shifts of **1**

| No.                  | Experimental<br>( $\delta_{\text{H}}$ , ppm) | Calculated ( $\delta_{\text{H}}$ , ppm)                 |                                                         |                                                         |                                                         |
|----------------------|----------------------------------------------|---------------------------------------------------------|---------------------------------------------------------|---------------------------------------------------------|---------------------------------------------------------|
|                      |                                              | (11 <i>R</i> , 12 <i>R</i> ,<br>13 <i>S</i> )- <b>1</b> | (11 <i>S</i> , 12 <i>R</i> ,<br>13 <i>S</i> )- <b>1</b> | (11 <i>R</i> , 12 <i>S</i> ,<br>13 <i>S</i> )- <b>1</b> | (11 <i>S</i> , 12 <i>S</i> ,<br>13 <i>S</i> )- <b>1</b> |
| 9                    | 6.00                                         | 6.40                                                    | 6.43                                                    | 6.37                                                    | 6.52                                                    |
| 10                   | 6.31                                         | 7.14                                                    | 7.18                                                    | 7.16                                                    | 6.90                                                    |
| 12                   | 3.39                                         | 3.38                                                    | 3.53                                                    | 3.56                                                    | 3.25                                                    |
| 13                   | 1.53                                         | 1.53                                                    | 1.46                                                    | 1.16                                                    | 1.47                                                    |
| 14a                  | 1.38                                         | 1.52                                                    | 1.55                                                    | 1.55                                                    | 1.82                                                    |
| 14b                  | 1.24                                         | 1.04                                                    | 1.14                                                    | 1.01                                                    | 1.24                                                    |
| 15                   | 0.85                                         | 0.82                                                    | 0.86                                                    | 0.71                                                    | 0.83                                                    |
| 17                   | 1.29                                         | 1.27                                                    | 1.47                                                    | 1.25                                                    | 1.25                                                    |
| 18                   | 0.90                                         | 0.96                                                    | 1.01                                                    | 0.99                                                    | 0.65                                                    |
| OCH3                 | 3.16                                         | 3.22                                                    | 3.39                                                    | 3.30                                                    | 3.25                                                    |
| <b>R<sup>2</sup></b> |                                              | <b>0.9953</b>                                           | <b>0.996</b>                                            | <b>0.9934</b>                                           | <b>0.992</b>                                            |
| <b>MAE</b>           |                                              | <b>0.17</b>                                             | <b>0.23</b>                                             | <b>0.26</b>                                             | <b>0.22</b>                                             |
| <b>CMAE</b>          |                                              | <b>0.114</b>                                            | <b>0.112</b>                                            | <b>0.130</b>                                            | <b>0.125</b>                                            |

**Figure S2.** Key MOs in important transitions of most populated conformer of **1**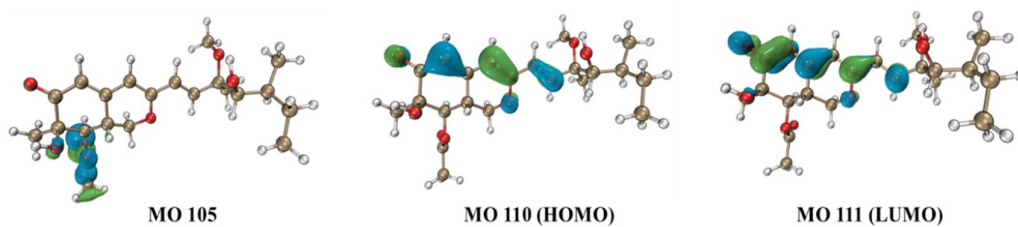

**Figure S3.** Linear regression analysis between experimental and calculated  $^{13}\text{C}$  and  $^1\text{H}$  NMR chemical shifts of isomers of **2**

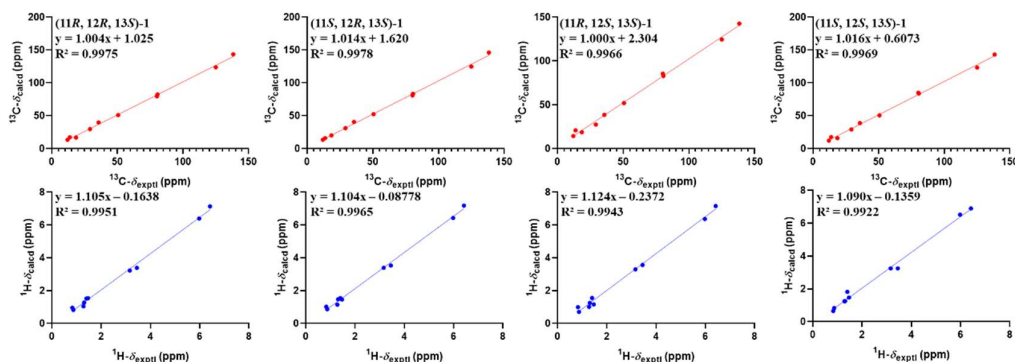

**Figure S4.** The results of the DP4+ analysis of **2**

| Functional<br>mPW1PW91 |      | Solvent?<br>PCM | Basis Set<br>6-31+G(d, p) |          |          | Type of Data<br>Unscaled Shifts |          |
|------------------------|------|-----------------|---------------------------|----------|----------|---------------------------------|----------|
|                        |      | DP4+            | 0.30%                     | 99.67%   | 0.00%    | 0.03%                           | —        |
| Nuclei                 | sp2? | experimental    | Isomer 1                  | Isomer 2 | Isomer 3 | Isomer 4                        | Isomer 5 |
| C                      | x    | 125             | 123.8                     | 124.8    | 124.5    | 123.3                           |          |
| C                      | x    | 138.4           | 143.4                     | 146.1    | 142.5    | 143.1                           |          |
| C                      |      | 80.6            | 82.4                      | 83.2     | 83.0     | 83.7                            |          |
| C                      |      | 80.2            | 79.6                      | 81.0     | 85.5     | 84.9                            |          |
| C                      |      | 35.7            | 39.8                      | 40.6     | 38.6     | 38.8                            |          |
| C                      |      | 29.2            | 29.7                      | 31.1     | 27.4     | 29.1                            |          |
| C                      |      | 12              | 13.4                      | 13.6     | 14.4     | 12.0                            |          |
| C                      |      | 18.5            | 16.8                      | 20.0     | 18.7     | 15.9                            |          |
| C                      |      | 13.8            | 17.3                      | 15.9     | 20.8     | 17.6                            |          |
| C                      |      | 50.6            | 50.9                      | 52.2     | 51.9     | 50.6                            |          |
| H                      | x    | 5.98            | 6.4                       | 6.4      | 6.4      | 6.5                             |          |
| H                      | x    | 6.42            | 7.14                      | 7.18     | 7.16     | 6.90                            |          |
| H                      |      | 3.45            | 3.38                      | 3.53     | 3.56     | 3.25                            |          |
| H                      |      | 1.47            | 1.53                      | 1.46     | 1.16     | 1.47                            |          |
| H                      |      | 1.4             | 1.52                      | 1.55     | 1.55     | 1.82                            |          |
| H                      |      | 1.28            | 1.04                      | 1.14     | 1.01     | 1.24                            |          |
| H                      |      | 0.87            | 0.82                      | 0.86     | 0.71     | 0.83                            |          |
| H                      |      | 1.31            | 1.27                      | 1.47     | 1.25     | 1.25                            |          |
| H                      |      | 0.83            | 0.96                      | 1.01     | 0.99     | 0.65                            |          |
| H                      |      | 3.16            | 3.22                      | 3.39     | 3.30     | 3.25                            |          |
|                        |      |                 | Isomer 1                  | Isomer 2 | Isomer 3 | Isomer 4                        | Isomer 5 |
| sDP4+ (H data)         |      |                 | 13.30%                    | 53.60%   | 6.40%    | 26.70%                          | —        |
| sDP4+ (C data)         |      |                 | 4.32%                     | 94.48%   | 0.79%    | 0.41%                           | —        |
| sDP4+ (all data)       |      |                 | 1.12%                     | 98.57%   | 0.10%    | 0.22%                           | —        |
| uDP4+ (H data)         |      |                 | 64.29%                    | 3.10%    | 0.33%    | 32.28%                          | —        |
| uDP4+ (C data)         |      |                 | 1.22%                     | 94.12%   | 3.53%    | 1.13%                           | —        |
| uDP4+ (all data)       |      |                 | 19.23%                    | 71.52%   | 0.29%    | 8.96%                           | —        |
| DP4+ (H data)          |      |                 | 45.36%                    | 8.80%    | 0.11%    | 45.72%                          | —        |
| DP4+ (C data)          |      |                 | 0.06%                     | 99.90%   | 0.03%    | 0.01%                           | —        |
| DP4+ (all data)        |      |                 | 0.30%                     | 99.67%   | 0.00%    | 0.03%                           | —        |

**Table S3.** Experimental and calculated  $^{13}\text{C}$  NMR chemical shifts of **2**

| No.                  | Experimental<br>( $\delta_{\text{C}}$ , ppm) | Calculated ( $\delta_{\text{C}}$ , ppm)                 |                                                         |                                                         |                                                         |
|----------------------|----------------------------------------------|---------------------------------------------------------|---------------------------------------------------------|---------------------------------------------------------|---------------------------------------------------------|
|                      |                                              | (11 <i>R</i> , 12 <i>R</i> ,<br>13 <i>S</i> )- <b>2</b> | (11 <i>S</i> , 12 <i>R</i> ,<br>13 <i>S</i> )- <b>2</b> | (11 <i>R</i> , 12 <i>S</i> ,<br>13 <i>S</i> )- <b>2</b> | (11 <i>S</i> , 12 <i>S</i> ,<br>13 <i>S</i> )- <b>2</b> |
| 9                    | 125                                          | 123.8                                                   | 124.8                                                   | 124.5                                                   | 123.3                                                   |
| 10                   | 138.4                                        | 143.4                                                   | 146.1                                                   | 142.5                                                   | 143.1                                                   |
| 11                   | 80.6                                         | 82.4                                                    | 83.2                                                    | 83.0                                                    | 83.7                                                    |
| 12                   | 80.2                                         | 79.6                                                    | 81.0                                                    | 85.5                                                    | 84.9                                                    |
| 13                   | 35.7                                         | 39.8                                                    | 40.6                                                    | 38.6                                                    | 38.8                                                    |
| 14                   | 29.2                                         | 29.7                                                    | 31.1                                                    | 27.4                                                    | 29.1                                                    |
| 15                   | 12                                           | 13.4                                                    | 13.6                                                    | 14.4                                                    | 12.0                                                    |
| 17                   | 18.5                                         | 16.8                                                    | 20.0                                                    | 18.7                                                    | 15.9                                                    |
| 18                   | 13.8                                         | 17.3                                                    | 15.9                                                    | 20.8                                                    | 17.6                                                    |
| OCH3                 | 50.6                                         | 50.9                                                    | 52.2                                                    | 51.9                                                    | 50.6                                                    |
| <b>R<sup>2</sup></b> |                                              | <b>0.9975</b>                                           | <b>0.9978</b>                                           | <b>0.9966</b>                                           | <b>0.9969</b>                                           |
| <b>MAE</b>           |                                              | <b>2.00</b>                                             | <b>2.48</b>                                             | <b>2.79</b>                                             | <b>2.39</b>                                             |
| <b>CMAE</b>          |                                              | <b>1.85</b>                                             | <b>1.41</b>                                             | <b>2.02</b>                                             | <b>2.17</b>                                             |

**Table S4.** Experimental and calculated  $^1\text{H}$  NMR chemical shifts of **2**

| No.                  | Experimental<br>( $\delta_{\text{H}}$ , ppm) | Calculated ( $\delta_{\text{H}}$ , ppm)                 |                                                         |                                                         |                                                         |
|----------------------|----------------------------------------------|---------------------------------------------------------|---------------------------------------------------------|---------------------------------------------------------|---------------------------------------------------------|
|                      |                                              | (11 <i>R</i> , 12 <i>R</i> ,<br>13 <i>S</i> )- <b>2</b> | (11 <i>S</i> , 12 <i>R</i> ,<br>13 <i>S</i> )- <b>2</b> | (11 <i>R</i> , 12 <i>S</i> ,<br>13 <i>S</i> )- <b>2</b> | (11 <i>S</i> , 12 <i>S</i> ,<br>13 <i>S</i> )- <b>2</b> |
| 9                    | 5.98                                         | 6.40                                                    | 6.43                                                    | 6.37                                                    | 6.52                                                    |
| 10                   | 6.42                                         | 7.14                                                    | 7.18                                                    | 7.16                                                    | 6.90                                                    |
| 12                   | 3.45                                         | 3.38                                                    | 3.53                                                    | 3.56                                                    | 3.25                                                    |
| 13                   | 1.47                                         | 1.53                                                    | 1.46                                                    | 1.16                                                    | 1.47                                                    |
| 14a                  | 1.4                                          | 1.52                                                    | 1.55                                                    | 1.55                                                    | 1.82                                                    |
| 14b                  | 1.28                                         | 1.04                                                    | 1.14                                                    | 1.01                                                    | 1.24                                                    |
| 15                   | 0.87                                         | 0.82                                                    | 0.86                                                    | 0.71                                                    | 0.83                                                    |
| 17                   | 1.31                                         | 1.27                                                    | 1.47                                                    | 1.25                                                    | 1.25                                                    |
| 18                   | 0.83                                         | 0.96                                                    | 1.01                                                    | 0.99                                                    | 0.65                                                    |
| OCH3                 | 3.16                                         | 3.22                                                    | 3.39                                                    | 3.30                                                    | 3.25                                                    |
| <b>R<sup>2</sup></b> |                                              | <b>0.9951</b>                                           | <b>0.9965</b>                                           | <b>0.9943</b>                                           | <b>0.9922</b>                                           |
| <b>MAE</b>           |                                              | <b>0.19</b>                                             | <b>0.27</b>                                             | <b>0.25</b>                                             | <b>0.21</b>                                             |
| <b>CMAE</b>          |                                              | <b>0.116</b>                                            | <b>0.102</b>                                            | <b>0.124</b>                                            | <b>0.114</b>                                            |

**Figure S5.** Linear regression analysis between experimental and calculated  $^{13}\text{C}$  and  $^1\text{H}$  NMR chemical shifts of isomers of **3**

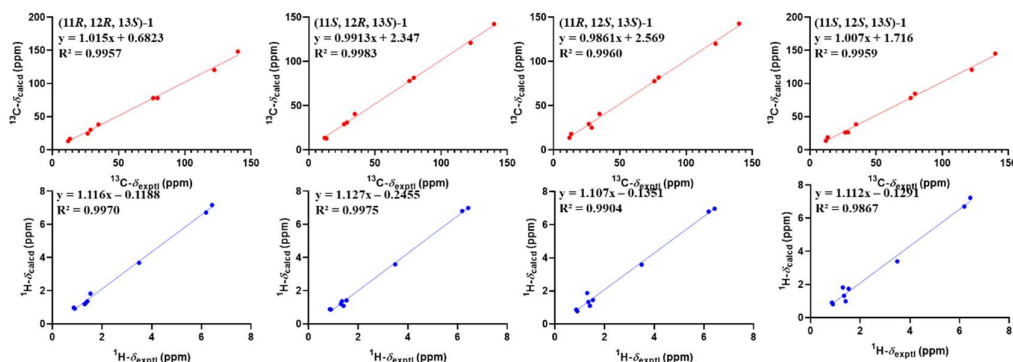

**Figure S6.** The results of the DP4+ analysis of **3**

| Functional       |      | Solvent?     |          | Basis Set   |          | Type of Data    |          |
|------------------|------|--------------|----------|-------------|----------|-----------------|----------|
| mPW1PW91         |      | PCM          |          | 6-31+G(d,p) |          | Unscaled Shifts |          |
|                  |      | DP4+         | 0.00%    | 100.00%     | 0.00%    | 0.00%           | —        |
| Nuclei           | sp2? | Experimental | Isomer 1 | Isomer 2    | Isomer 3 | Isomer 4        | Isomer 5 |
| C                | x    | 122.3        | 120.5    | 121.0       | 120.0    | 120.8           |          |
| C                | x    | 140          | 148.2    | 142.3       | 142.8    | 145.2           |          |
| C                |      | 76.1         | 78.0     | 78.0        | 77.7     | 78.2            |          |
| C                |      | 79.4         | 78.1     | 81.6        | 81.9     | 84.9            |          |
| C                |      | 34.8         | 38.3     | 40.6        | 40.7     | 38.6            |          |
| C                |      | 28.9         | 30.3     | 31.1        | 25.1     | 26.4            |          |
| C                |      | 12           | 13.3     | 13.6        | 13.8     | 13.7            |          |
| C                |      | 26.7         | 24.5     | 29.0        | 29.3     | 26.3            |          |
| C                |      | 13.4         | 16.8     | 12.9        | 18.0     | 18.9            |          |
| H                | x    | 6.19         | 6.7      | 6.8         | 6.8      | 6.7             |          |
| H                | x    | 6.43         | 7.17     | 6.99        | 6.97     | 7.23            |          |
| H                |      | 3.49         | 3.68     | 3.59        | 3.59     | 3.40            |          |
| H                |      | 1.53         | 1.83     | 1.42        | 1.45     | 1.75            |          |
| H                |      | 1.41         | 1.36     | 1.09        | 1.10     | 0.99            |          |
| H                |      | 1.3          | 1.19     | 1.21        | 1.87     | 1.82            |          |
| H                |      | 0.9          | 0.92     | 0.87        | 0.77     | 0.81            |          |
| H                |      | 1.35         | 1.26     | 1.36        | 1.33     | 1.32            |          |
| H                |      | 0.86         | 0.98     | 0.88        | 0.87     | 0.91            |          |
|                  |      |              | Isomer 1 | Isomer 2    | Isomer 3 | Isomer 4        | Isomer 5 |
| sDP4+ (H data)   |      |              | 12.54%   | 86.17%      | 1.27%    | 0.02%           | —        |
| sDP4+ (C data)   |      |              | 0.04%    | 99.73%      | 0.20%    | 0.03%           | —        |
| sDP4+ (all data) |      |              | 0.01%    | 99.99%      | 0.00%    | 0.00%           | —        |
| uDP4+ (H data)   |      |              | 4.50%    | 93.53%      | 1.86%    | 0.11%           | —        |
| uDP4+ (C data)   |      |              | 0.09%    | 98.26%      | 1.56%    | 0.09%           | —        |
| uDP4+ (all data) |      |              | 0.00%    | 99.96%      | 0.03%    | 0.00%           | —        |
| DP4+ (H data)    |      |              | 0.70%    | 99.28%      | 0.03%    | 0.00%           | —        |
| DP4+ (C data)    |      |              | 0.00%    | 100.00%     | 0.00%    | 0.00%           | —        |
| DP4+ (all data)  |      |              | 0.00%    | 100.00%     | 0.00%    | 0.00%           | —        |

**Table S5.** Experimental and calculated  $^{13}\text{C}$  NMR chemical shifts of **3**

| No.                  | Experimental<br>( $\delta_{\text{C}}$ , ppm) | Calculated ( $\delta_{\text{C}}$ , ppm)                 |                                                         |                                                         |                                                         |
|----------------------|----------------------------------------------|---------------------------------------------------------|---------------------------------------------------------|---------------------------------------------------------|---------------------------------------------------------|
|                      |                                              | (11 <i>R</i> , 12 <i>R</i> ,<br>13 <i>S</i> )- <b>3</b> | (11 <i>S</i> , 12 <i>R</i> ,<br>13 <i>S</i> )- <b>3</b> | (11 <i>R</i> , 12 <i>S</i> ,<br>13 <i>S</i> )- <b>3</b> | (11 <i>S</i> , 12 <i>S</i> ,<br>13 <i>S</i> )- <b>3</b> |
| 9                    | 122.3                                        | 120.5                                                   | 121.0                                                   | 120.0                                                   | 120.8                                                   |
| 10                   | 140                                          | 148.2                                                   | 142.3                                                   | 142.8                                                   | 145.2                                                   |
| 11                   | 76.1                                         | 78.0                                                    | 78.0                                                    | 77.7                                                    | 78.2                                                    |
| 12                   | 79.4                                         | 78.1                                                    | 81.6                                                    | 81.9                                                    | 84.9                                                    |
| 13                   | 34.8                                         | 38.3                                                    | 40.6                                                    | 40.7                                                    | 38.6                                                    |
| 14                   | 28.9                                         | 30.3                                                    | 31.1                                                    | 25.1                                                    | 26.4                                                    |
| 15                   | 12                                           | 13.3                                                    | 13.6                                                    | 13.8                                                    | 13.7                                                    |
| 17                   | 26.7                                         | 24.5                                                    | 29.0                                                    | 29.3                                                    | 26.3                                                    |
| 18                   | 13.4                                         | 16.8                                                    | 12.9                                                    | 18.0                                                    | 18.9                                                    |
| <b>R<sup>2</sup></b> |                                              | <b>0.9957</b>                                           | <b>0.9983</b>                                           | <b>0.996</b>                                            | <b>0.9959</b>                                           |
| <b>MAE</b>           |                                              | <b>2.76</b>                                             | <b>2.22</b>                                             | <b>3.08</b>                                             | <b>3.11</b>                                             |
| <b>CMAE</b>          |                                              | <b>2.37</b>                                             | <b>1.32</b>                                             | <b>2.19</b>                                             | <b>2.45</b>                                             |

**Table S6.** Experimental and calculated  $^1\text{H}$  NMR chemical shifts of **3**

| No.                  | Experimental<br>( $\delta_{\text{H}}$ , ppm) | Calculated ( $\delta_{\text{H}}$ , ppm)                 |                                                         |                                                         |                                                         |
|----------------------|----------------------------------------------|---------------------------------------------------------|---------------------------------------------------------|---------------------------------------------------------|---------------------------------------------------------|
|                      |                                              | (11 <i>R</i> , 12 <i>R</i> ,<br>13 <i>S</i> )- <b>3</b> | (11 <i>S</i> , 12 <i>R</i> ,<br>13 <i>S</i> )- <b>3</b> | (11 <i>R</i> , 12 <i>S</i> ,<br>13 <i>S</i> )- <b>3</b> | (11 <i>S</i> , 12 <i>S</i> ,<br>13 <i>S</i> )- <b>3</b> |
| 9                    | 6.19                                         | 6.72                                                    | 6.81                                                    | 6.80                                                    | 6.70                                                    |
| 10                   | 6.43                                         | 7.17                                                    | 6.99                                                    | 6.97                                                    | 7.23                                                    |
| 12                   | 3.49                                         | 3.68                                                    | 3.59                                                    | 3.59                                                    | 3.40                                                    |
| 13                   | 1.53                                         | 1.83                                                    | 1.42                                                    | 1.45                                                    | 1.75                                                    |
| 14a                  | 1.41                                         | 1.36                                                    | 1.09                                                    | 1.10                                                    | 0.99                                                    |
| 14b                  | 1.3                                          | 1.19                                                    | 1.21                                                    | 1.87                                                    | 1.82                                                    |
| 15                   | 0.9                                          | 0.92                                                    | 0.87                                                    | 0.77                                                    | 0.81                                                    |
| 17                   | 1.35                                         | 1.26                                                    | 1.36                                                    | 1.33                                                    | 1.32                                                    |
| 18                   | 0.86                                         | 0.98                                                    | 0.88                                                    | 0.87                                                    | 0.91                                                    |
| <b>R<sup>2</sup></b> |                                              | <b>0.997</b>                                            | <b>0.9975</b>                                           | <b>0.9904</b>                                           | <b>0.9867</b>                                           |
| <b>MAE</b>           |                                              | <b>0.24</b>                                             | <b>0.20</b>                                             | <b>0.26</b>                                             | <b>0.30</b>                                             |
| <b>CMAE</b>          |                                              | <b>0.106</b>                                            | <b>0.083</b>                                            | <b>0.142</b>                                            | <b>0.225</b>                                            |

**Figure S7.** Linear regression analysis between experimental and calculated  $^{13}\text{C}$  and  $^1\text{H}$  NMR chemical shifts of isomers of **4**

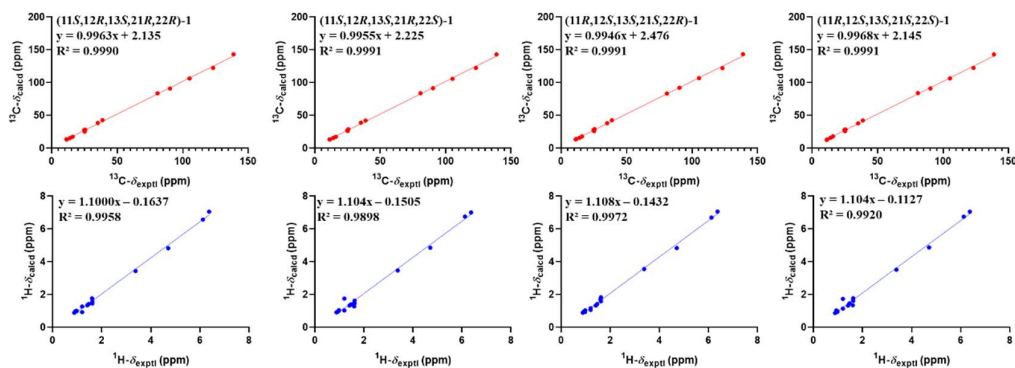

**Figure S8.** The results of the DP4+ analysis of **4**



| Functional<br>mPVP91 |      | Solvent?<br>PCI | Basis Set<br>6-31+G(d,p) |             |             | Type of Data<br>Unscaled Shifts |          |
|----------------------|------|-----------------|--------------------------|-------------|-------------|---------------------------------|----------|
|                      |      | DP4+            | 0.17%                    | 0.00%       | 99.83%      | 0.00%                           | -        |
| Nuclei               | sp2? | xperimenta      | Isomer 1                 | Isomer 2    | Isomer 3    | Isomer 4                        | Isomer 5 |
| C                    | x    | 123.2           | 122.4                    | 122.5       | 122.0       | 122.4                           |          |
| C                    | x    | 138.9           | 143.0                    | 142.9       | 143.2       | 143.0                           |          |
| C                    |      | 80.8            | 83.5                     | 83.8        | 83.2        | 83.9                            |          |
| C                    |      | 90.4            | 91.0                     | 91.4        | 92.0        | 91.1                            |          |
| C                    |      | 35.2            | 38.5                     | 38.8        | 38.1        | 37.7                            |          |
| C                    |      | 25.6            | 28.1                     | 28.8        | 28.9        | 28.5                            |          |
| C                    |      | 11.2            | 13.6                     | 13.4        | 13.5        | 12.6                            |          |
| C                    |      | 25.2            | 25.3                     | 26.3        | 25.8        | 25.9                            |          |
| C                    |      | 16              | 17.5                     | 17.3        | 18.0        | 17.8                            |          |
| C                    |      | 105.3           | 106.3                    | 105.8       | 106.8       | 106.4                           |          |
| C                    |      | 38.8            | 42.8                     | 42.0        | 42.6        | 42.3                            |          |
| C                    |      | 24.8            | 27.55                    | 26.94       | 27.95       | 27.96                           |          |
| C                    |      | 11.6            | 13.17                    | 13.29       | 14.08       | 13.44                           |          |
| C                    |      | 14.1            | 15.63                    | 15.59       | 15.72       | 15.73                           |          |
| H                    | x    | 6.12            | 6.57                     | 6.75        | 6.69        | 6.74                            |          |
| H                    | x    | 6.37            | 7.05                     | 7.00        | 7.06        | 7.05                            |          |
| H                    |      | 3.38            | 3.43                     | 3.46        | 3.55        | 3.51                            |          |
| H                    |      | 1.47            | 1.42                     | 1.40        | 1.42        | 1.46                            |          |
| H                    |      | 1.62            | 1.45                     | 1.46        | 1.83        | 1.77                            |          |
| H                    |      | 1.2             | 0.92                     | 1.02        | 1.06        | 1.14                            |          |
| H                    |      | 0.88            | 0.89                     | 0.91        | 0.89        | 0.87                            |          |
| H                    |      | 1.41            | 1.34                     | 1.32        | 1.32        | 1.32                            |          |
| H                    |      | 0.97            | 1.00                     | 0.99        | 0.93        | 0.94                            |          |
| H                    |      | 4.71            | 4.82                     | 4.85        | 4.83        | 4.87                            |          |
| H                    |      | 1.62            | 1.57                     | 1.62        | 1.59        | 1.61                            |          |
| H                    |      | 1.6             | 1.761162544              | 1.266526707 | 1.707151765 | 1.339702434                     |          |
| H                    |      | 1.2             | 1.262498262              | 1.751178568 | 1.157815444 | 1.725450987                     |          |
| H                    |      | 0.93            | 0.984253303              | 0.949861895 | 0.968849965 | 1.020140488                     |          |
| H                    |      | 0.98            | 0.982969465              | 1.038283163 | 1.027742854 | 0.973494884                     |          |
|                      |      |                 | Isomer 1                 | Isomer 2    | Isomer 3    | Isomer 4                        | Isomer 5 |
| sDP4+ (H data)       |      |                 | 3.86%                    | 0.03%       | 95.02%      | 1.08%                           | -        |
| sDP4+ (C data)       |      |                 | 8.23%                    | 23.71%      | 42.59%      | 25.48%                          | -        |
| sDP4+ (all data)     |      |                 | 0.77%                    | 0.02%       | 98.54%      | 0.67%                           | -        |
| uDP4+ (H data)       |      |                 | 72.36%                   | 0.16%       | 26.96%      | 0.51%                           | -        |
| uDP4+ (C data)       |      |                 | 5.34%                    | 10.45%      | 67.53%      | 16.69%                          | -        |
| uDP4+ (all data)     |      |                 | 17.41%                   | 0.08%       | 82.13%      | 0.38%                           | -        |
| DP4+ (H data)        |      |                 | 9.83%                    | 0.00%       | 90.15%      | 0.02%                           | -        |
| DP4+ (C data)        |      |                 | 1.22%                    | 6.89%       | 80.05%      | 11.83%                          | -        |
| DP4+ (all data)      |      |                 | 0.17%                    | 0.00%       | 99.83%      | 0.00%                           | -        |

**Table S7.** Experimental and calculated  $^{13}\text{C}$  NMR chemical shifts of 4

| No. | Experiment<br>al<br>( $\delta_{\text{C}}$ , ppm) | Calculated ( $\delta_{\text{C}}$ , ppm) |                     |                     |                     |
|-----|--------------------------------------------------|-----------------------------------------|---------------------|---------------------|---------------------|
|     |                                                  | (11S,12R,13S,21R,22                     | (11S,12R,13S,21R,22 | (11R,12S,13S,21S,22 | (11R,12S,13S,21S,22 |
|     |                                                  | R)-4                                    | S)-4                | R)-4                | S)-4                |
| 9   | 123.2                                            | 122.4                                   | 122.5               | 122.0               | 122.4               |
| 10  | 138.9                                            | 143.0                                   | 142.9               | 143.2               | 143.0               |
| 11  | 80.8                                             | 83.5                                    | 83.8                | 83.2                | 83.9                |
| 12  | 90.4                                             | 91.0                                    | 91.4                | 92.0                | 91.1                |
| 13  | 35.2                                             | 38.5                                    | 38.8                | 38.1                | 37.7                |
| 14  | 25.6                                             | 28.1                                    | 28.8                | 28.9                | 28.5                |
| 15  | 11.2                                             | 13.6                                    | 13.4                | 13.5                | 12.6                |
| 17  | 25.2                                             | 25.3                                    | 26.3                | 25.8                | 25.9                |
| 18  | 16.0                                             | 17.5                                    | 17.3                | 18.0                | 17.8                |
| 21  | 105.3                                            | 106.3                                   | 105.8               | 106.8               | 106.4               |
| 22  | 38.8                                             | 42.8                                    | 42.0                | 42.6                | 42.3                |
| 23  | 24.8                                             | 27.6                                    | 26.9                | 28.0                | 28.0                |

|                      |      |               |               |               |               |
|----------------------|------|---------------|---------------|---------------|---------------|
| 24                   | 11.6 | 13.2          | 13.3          | 14.1          | 13.4          |
| 25                   | 14.1 | 15.6          | 15.6          | 15.7          | 15.7          |
| <b>R<sup>2</sup></b> |      | <b>0.9990</b> | <b>0.9991</b> | <b>0.9991</b> | <b>0.9991</b> |
| <b>MAE</b>           |      | <b>2.06</b>   | <b>2.09</b>   | <b>2.36</b>   | <b>2.10</b>   |
| <b>CMAE</b>          |      | <b>1.23</b>   | <b>1.10</b>   | <b>1.21</b>   | <b>1.16</b>   |

**Table S8.** Experimental and calculated <sup>1</sup>H NMR chemical shifts of **4**

| No.                  | Experimental<br>( $\delta_{\text{H}}$ , ppm) | Calculated ( $\delta_{\text{H}}$ , ppm) |                    |                     |                    |
|----------------------|----------------------------------------------|-----------------------------------------|--------------------|---------------------|--------------------|
|                      |                                              | (11S,12R,13S,21R,22                     | (11S,12R,13S,21R,2 | (11R,12S,13S,21S,22 | (11R,12S,13S,21S,2 |
|                      |                                              | <i>R</i> )-4                            | 2S)-4              | <i>R</i> )-4        | 2S)-4              |
| 9                    | 6.12                                         | 6.57                                    | 6.75               | 6.69                | 6.74               |
| 10                   | 6.37                                         | 7.05                                    | 7.00               | 7.06                | 7.05               |
| 12                   | 3.38                                         | 3.43                                    | 3.46               | 3.55                | 3.51               |
| 13                   | 1.47                                         | 1.42                                    | 1.40               | 1.42                | 1.46               |
| 14a                  | 1.62                                         | 1.45                                    | 1.46               | 1.83                | 1.77               |
| 14b                  | 1.20                                         | 0.92                                    | 1.02               | 1.06                | 1.14               |
| 15                   | 0.88                                         | 0.89                                    | 0.91               | 0.89                | 0.87               |
| 17                   | 1.41                                         | 1.34                                    | 1.32               | 1.32                | 1.32               |
| 18                   | 0.97                                         | 1.00                                    | 0.99               | 0.93                | 0.94               |
| 21                   | 4.71                                         | 4.82                                    | 4.85               | 4.83                | 4.87               |
| 22                   | 1.62                                         | 1.57                                    | 1.62               | 1.59                | 1.61               |
| 23a                  | 1.60                                         | 1.76                                    | 1.27               | 1.71                | 1.34               |
| 23b                  | 1.20                                         | 1.26                                    | 1.75               | 1.16                | 1.73               |
| 24                   | 0.93                                         | 0.98                                    | 0.95               | 0.97                | 1.02               |
| 25                   | 0.98                                         | 0.98                                    | 1.04               | 1.03                | 0.97               |
| <b>R<sup>2</sup></b> |                                              | <b>0.9958</b>                           | <b>0.9898</b>      | <b>0.9972</b>       | <b>0.9820</b>      |
| <b>MAE</b>           |                                              | <b>0.15</b>                             | <b>0.20</b>        | <b>0.16</b>         | <b>0.19</b>        |
| <b>CMAE</b>          |                                              | <b>0.11</b>                             | <b>0.15</b>        | <b>0.10</b>         | <b>0.12</b>        |

**Figure S9.** <sup>1</sup>H-<sup>1</sup>H COSY (blue bold lines) and key HMBC (red arrows) correlations of compound **2**

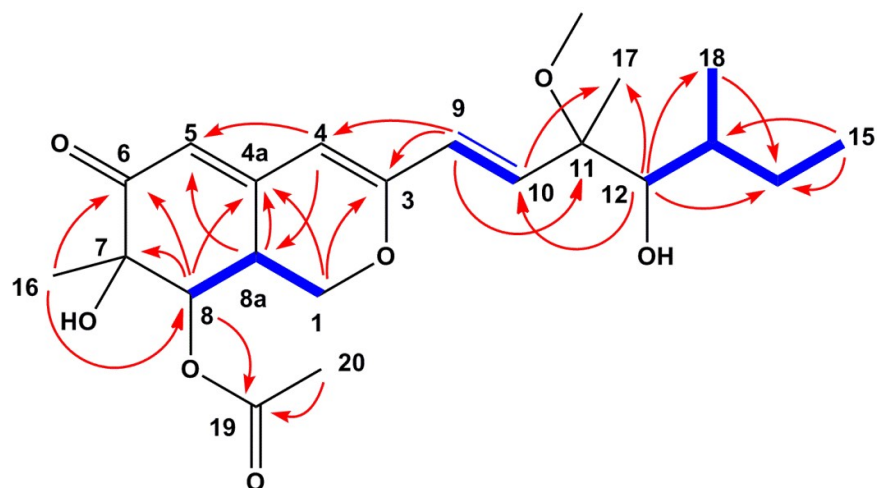

**Figure S10.** The key NOESY correlations of compound **2**

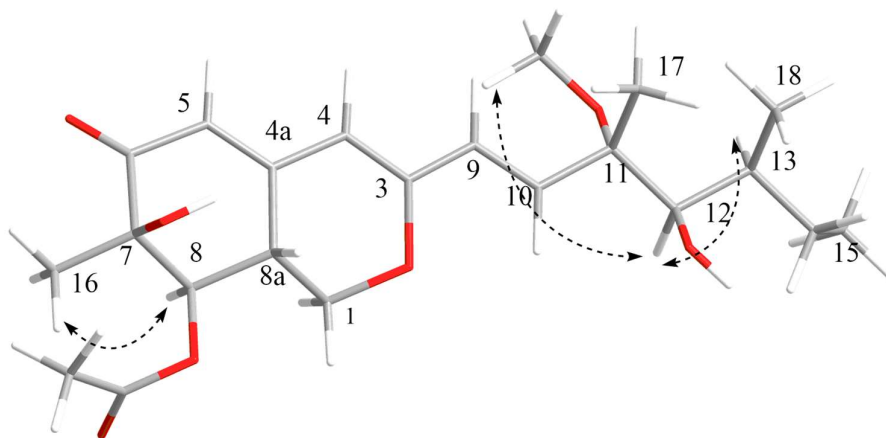

**Figure S11.**  $^1\text{H}$ - $^1\text{H}$  COSY (blue bold lines) and key HMBC (red arrows) correlations of compound **3**

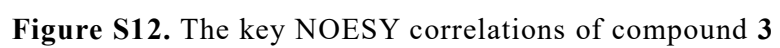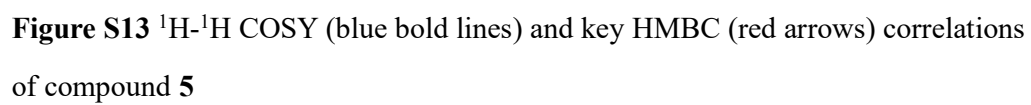

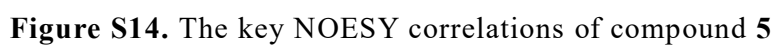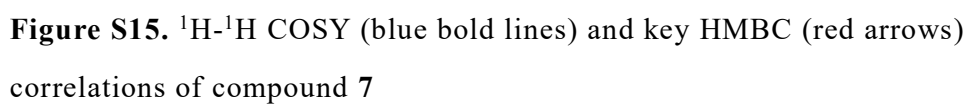

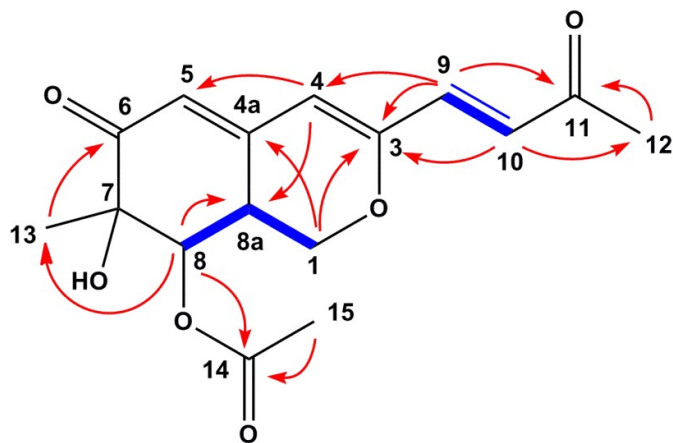

**Figure S16.** The key NOESY correlations of compound 7

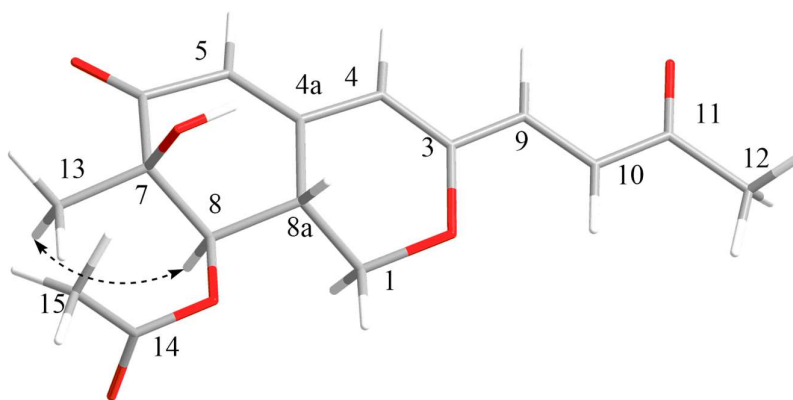

**Figure S17.**  $^1\text{H}$ - $^1\text{H}$  COSY (blue bold lines) and key HMBC (red arrows) correlations of compound 8

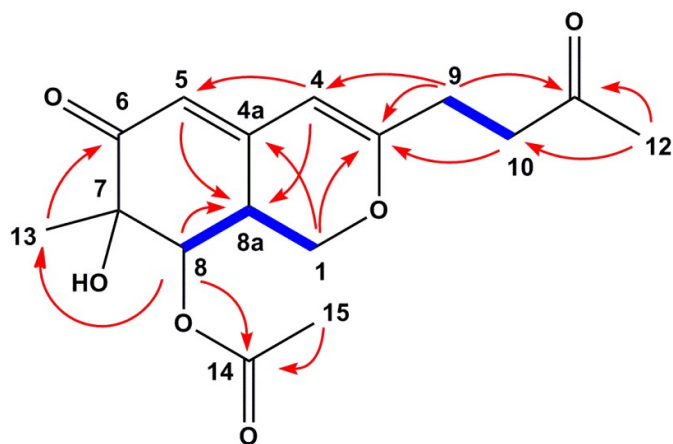

**Figure S18.** The key NOESY correlations of compound **8**

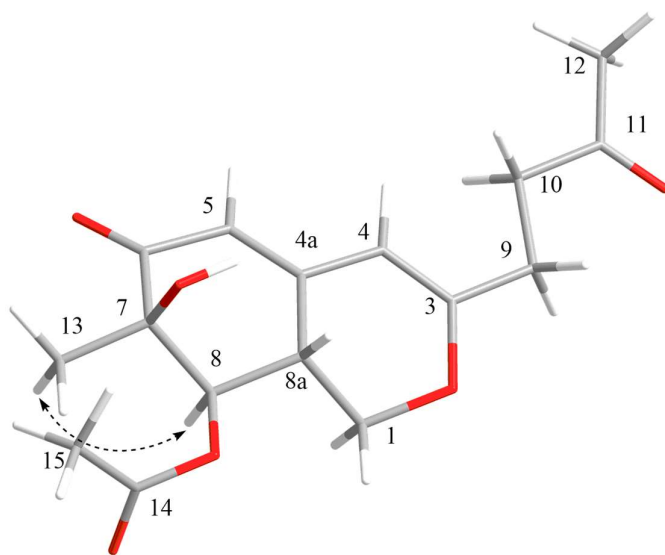

**Figure S19.**  $^1\text{H}$  NMR (600 MHz,  $\text{CDCl}_3$ ) spectrum of compound **1**

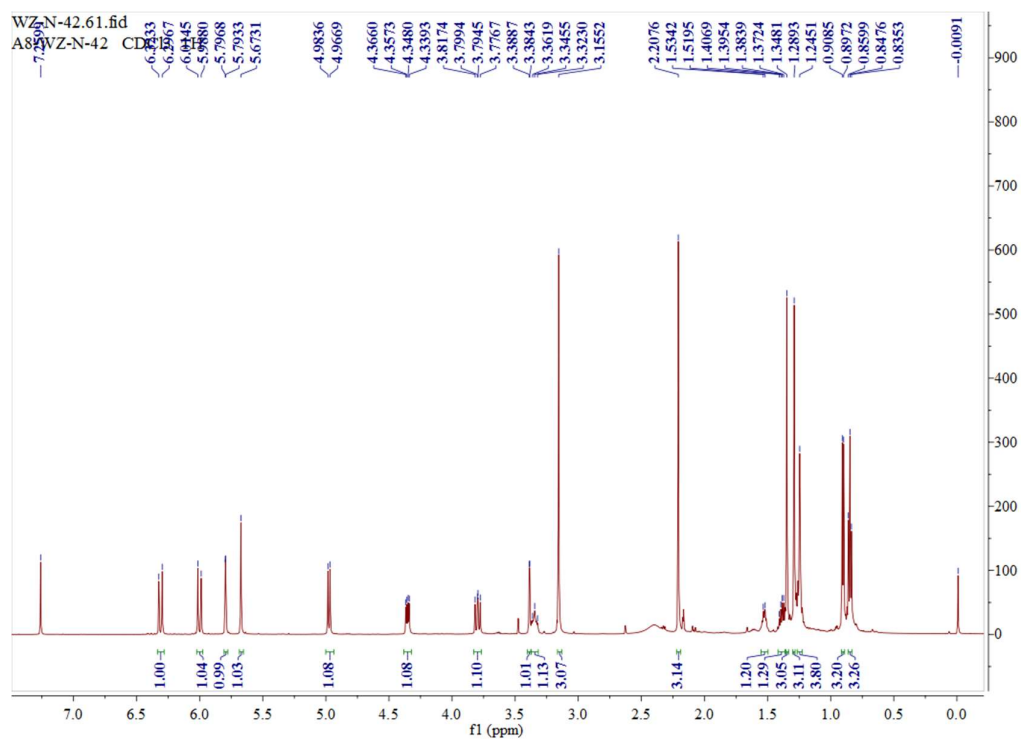

**Figure S20.** <sup>13</sup>C NMR (125 MHz, CDCl<sub>3</sub>) spectrum of compound **1**

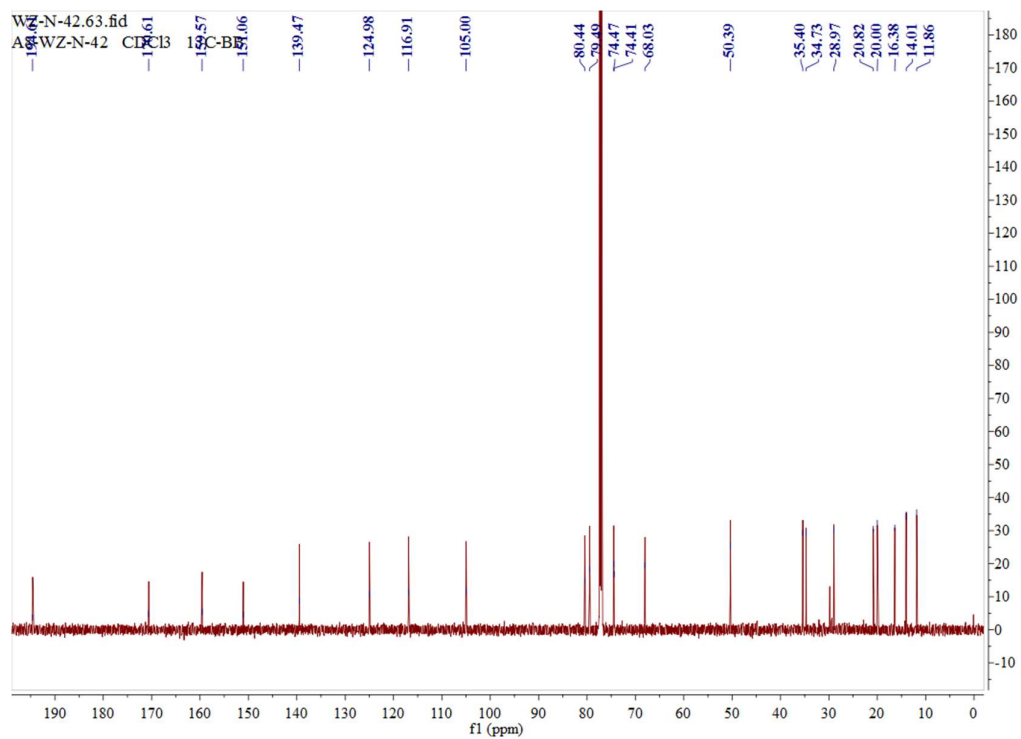

**Figure S21.** DEPT spectrum of compound **1**



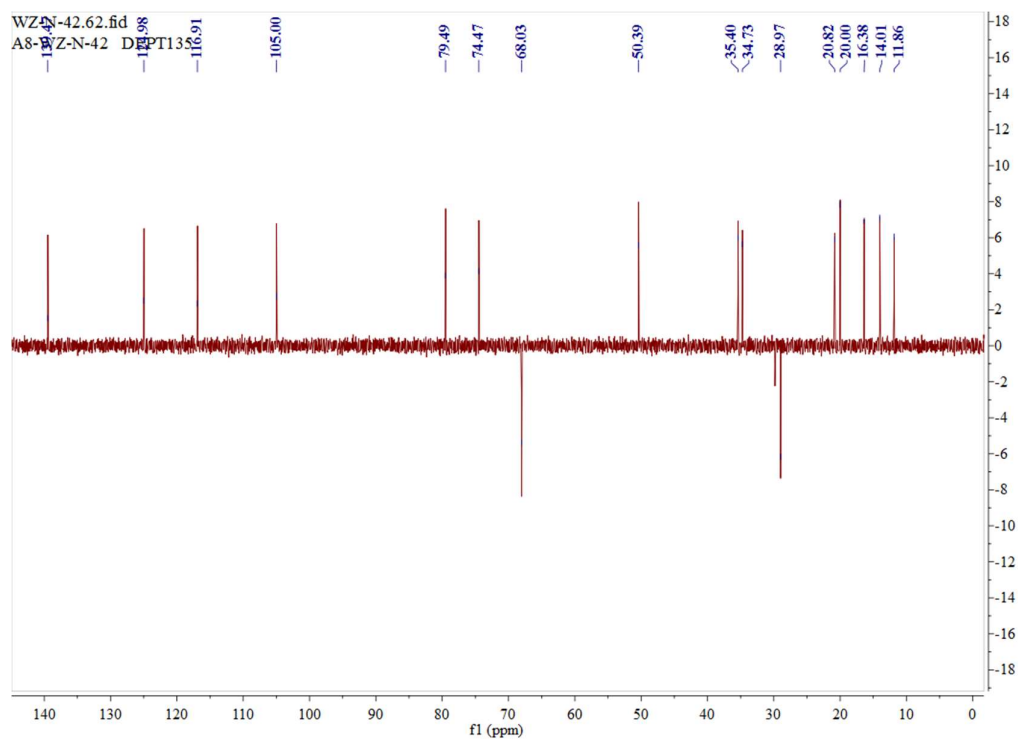

**Figure S22.** HSQC spectrum of compound **1**

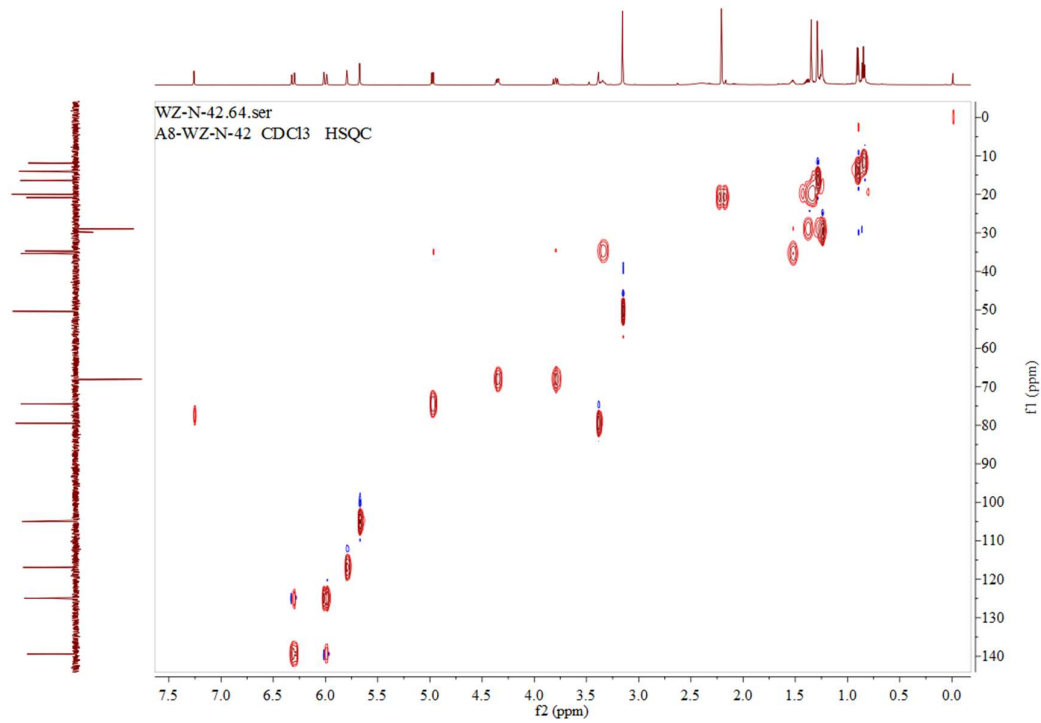

**Figure S23.** HMBC spectrum of compound **1**

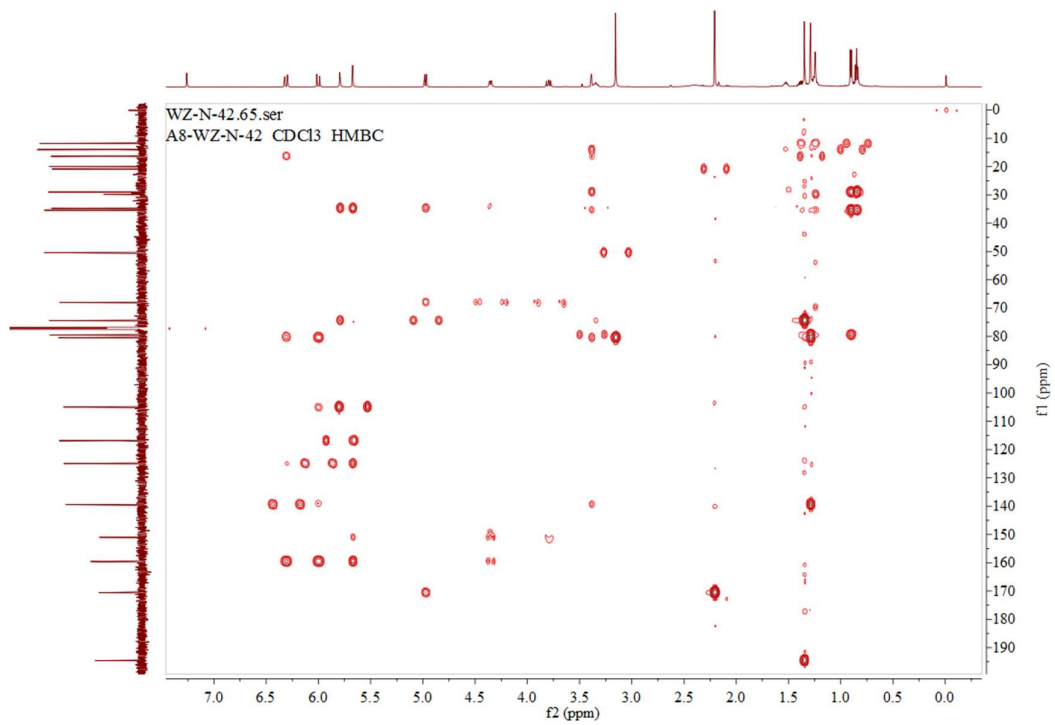

**Figure S24.** <sup>1</sup>H-<sup>1</sup>H COSY spectrum of compound **1**

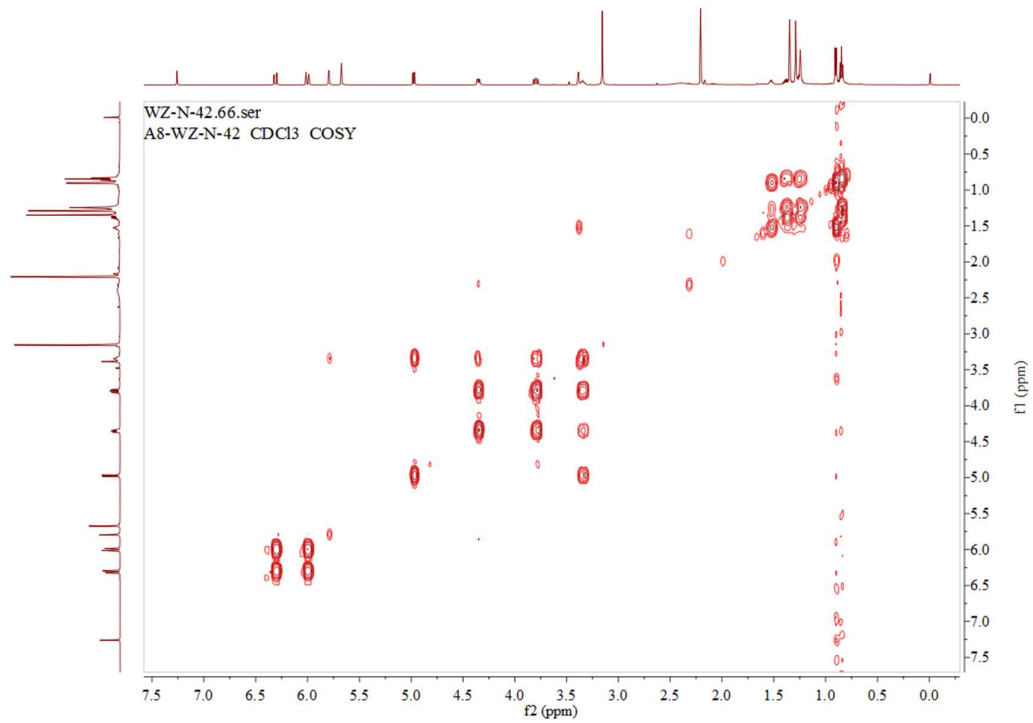

**Figure S25.** NOESY spectrum of compound **1**

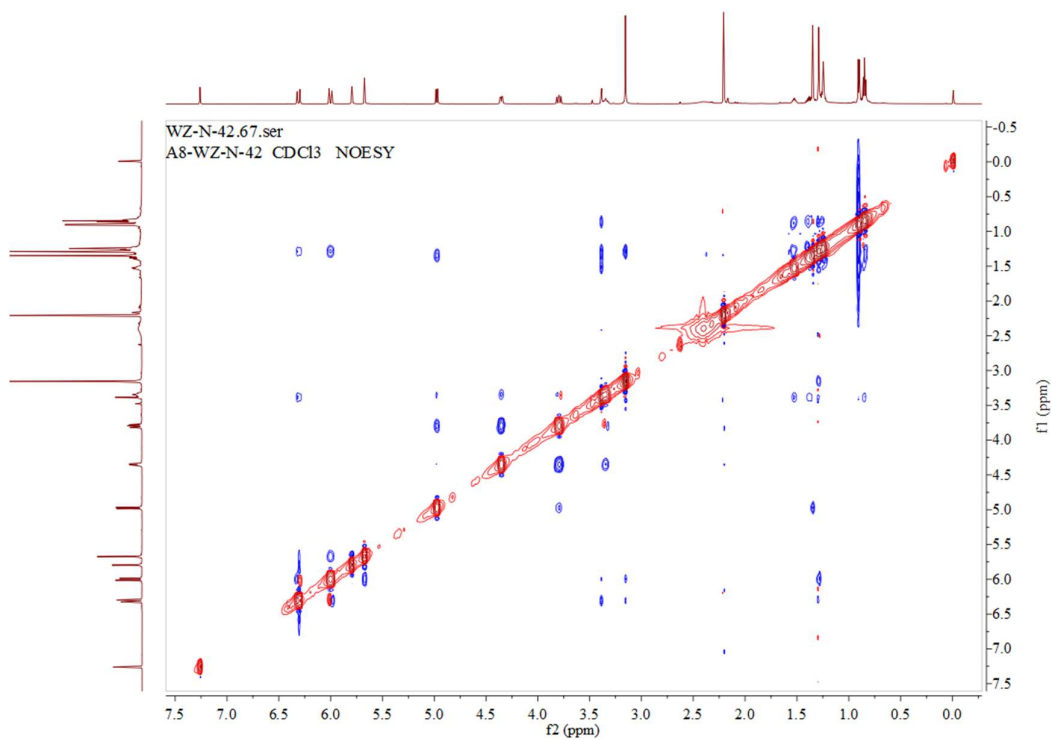

Figure S26. HRESIMS spectrum of compound 1

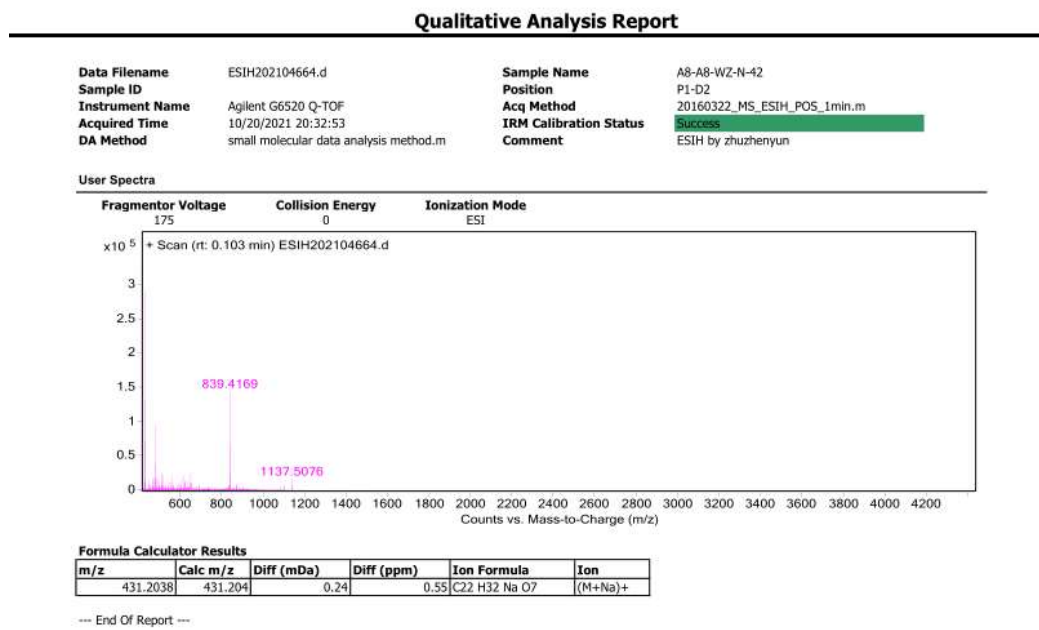

Figure S27. UV spectrum of compound 1

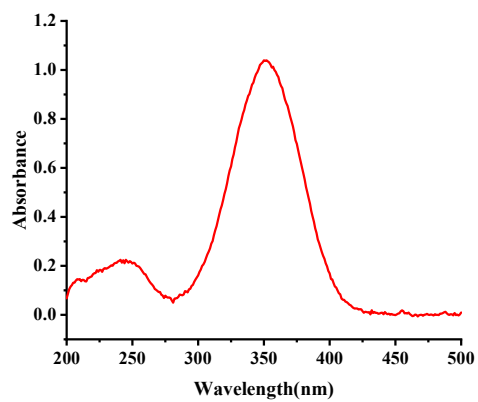

**Figure S28.** IR spectrum of compound 1

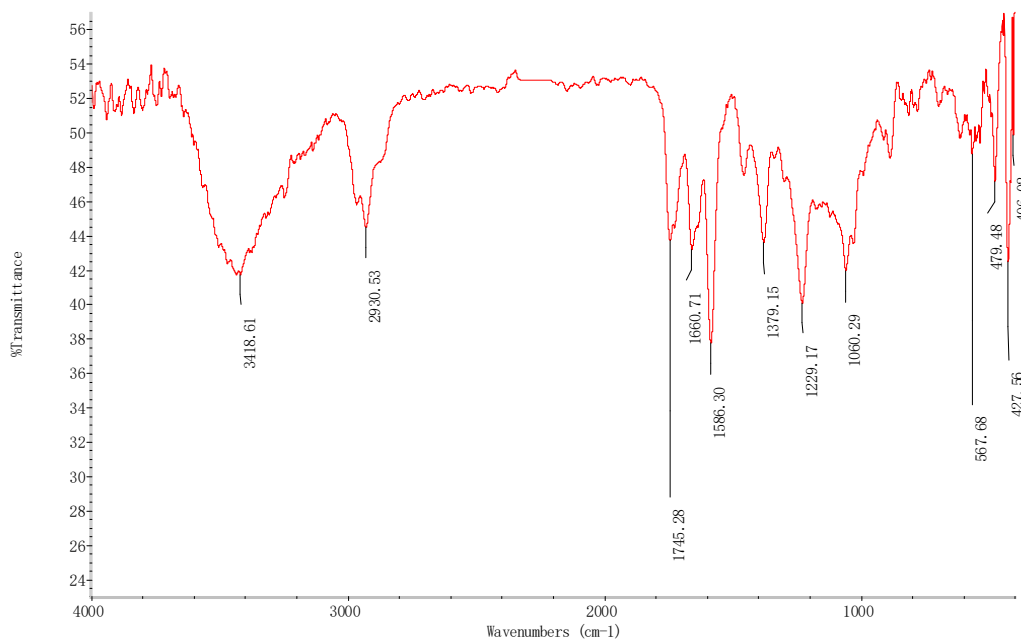

**Figure S29.** <sup>1</sup>H NMR (600 MHz, CDCl<sub>3</sub>) spectrum of compound 2

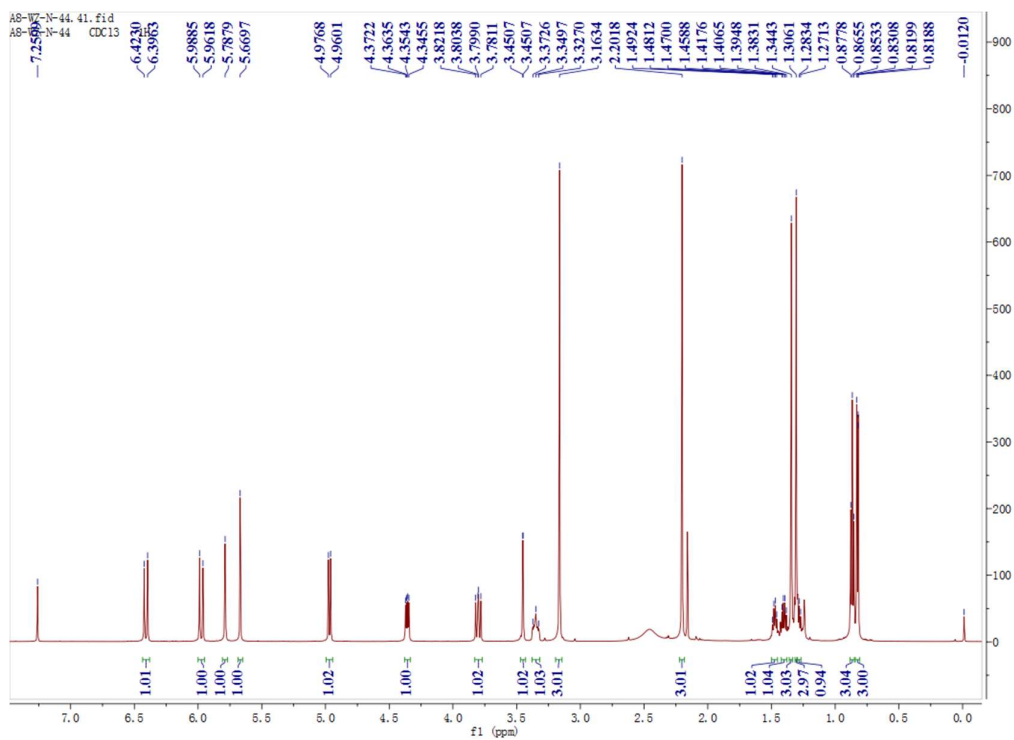

**Figure S30.** <sup>13</sup>C NMR (125 MHz, CDCl<sub>3</sub>) spectrum of compound **2**

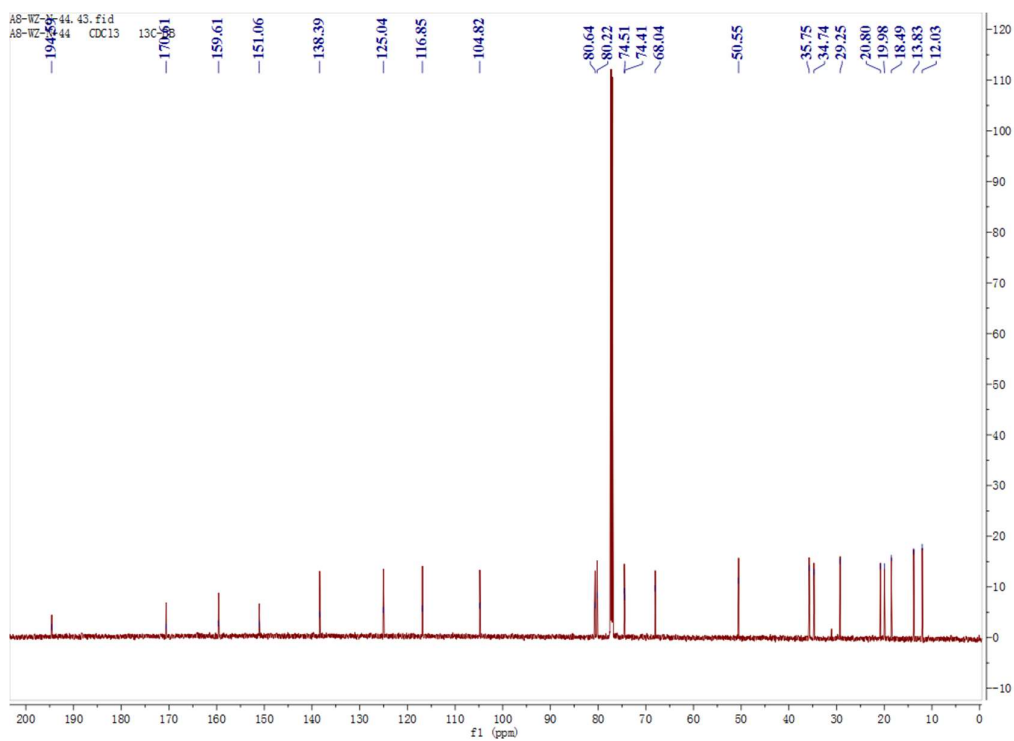

**Figure S30.** DEPT spectrum of compound **2**

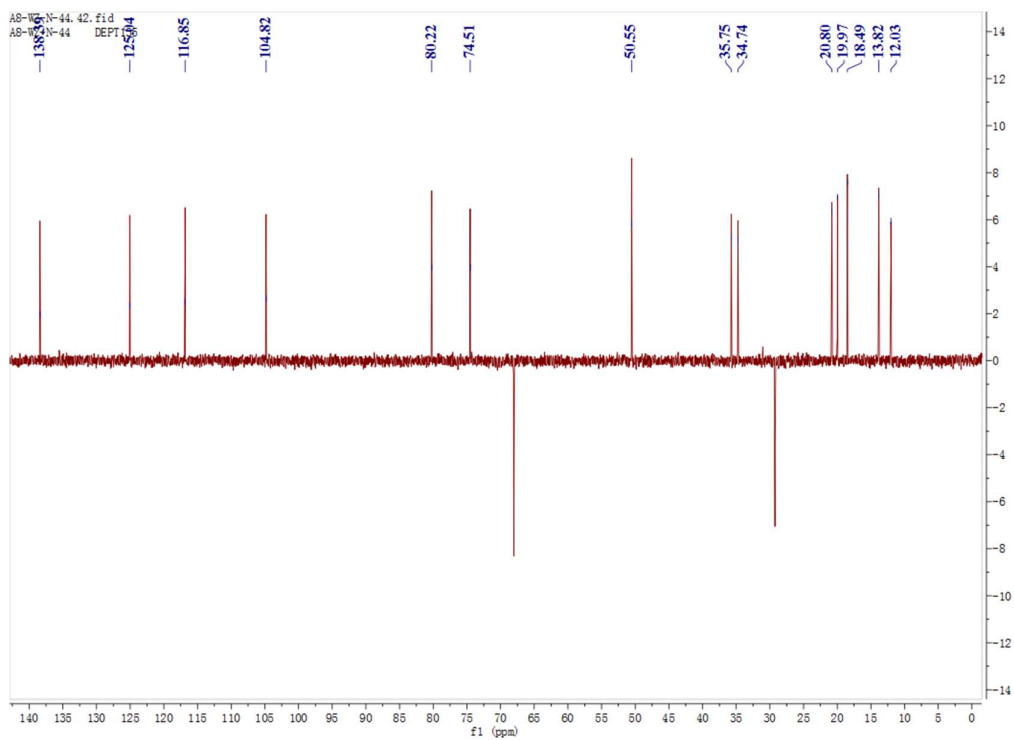

**Figure S32.** HSQC spectrum of compound **2**

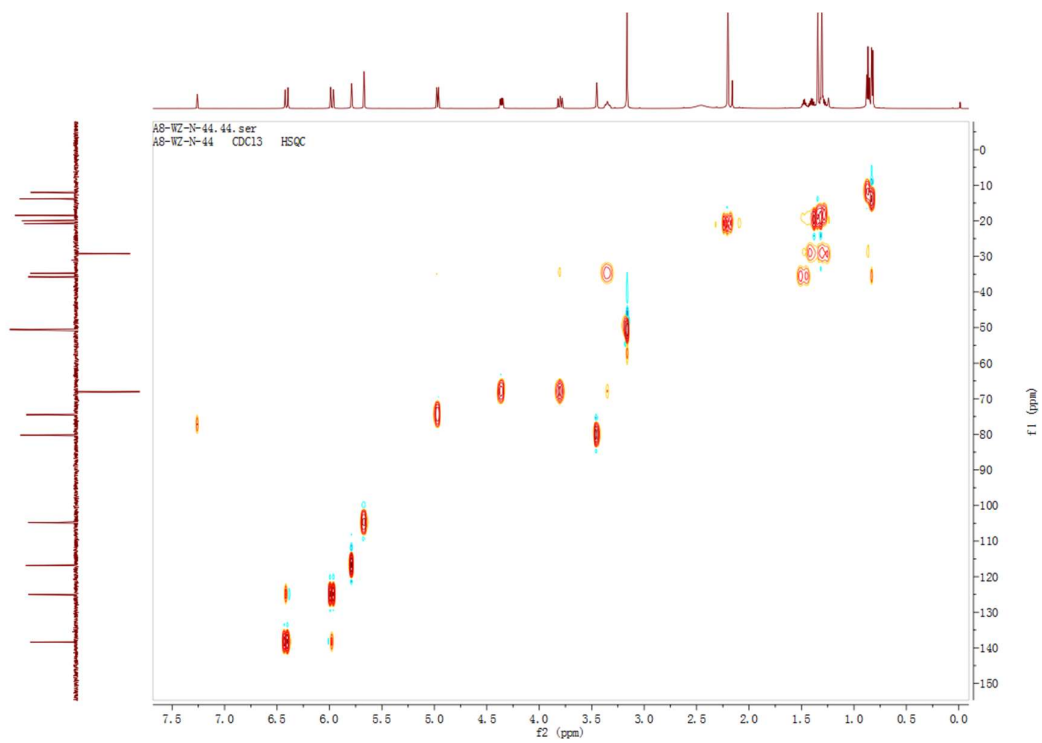

**Figure S33.** HMBC spectrum of compound **2**

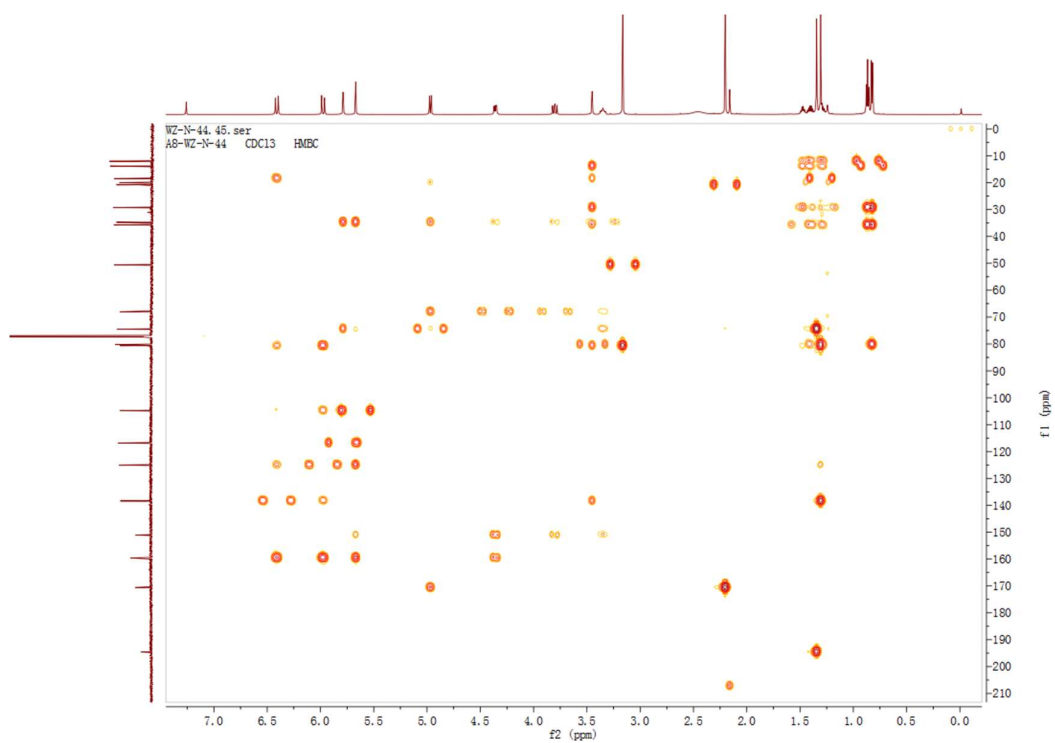

**Figure S34.**  $^1\text{H}$ - $^1\text{H}$  COSY spectrum of compound **1**

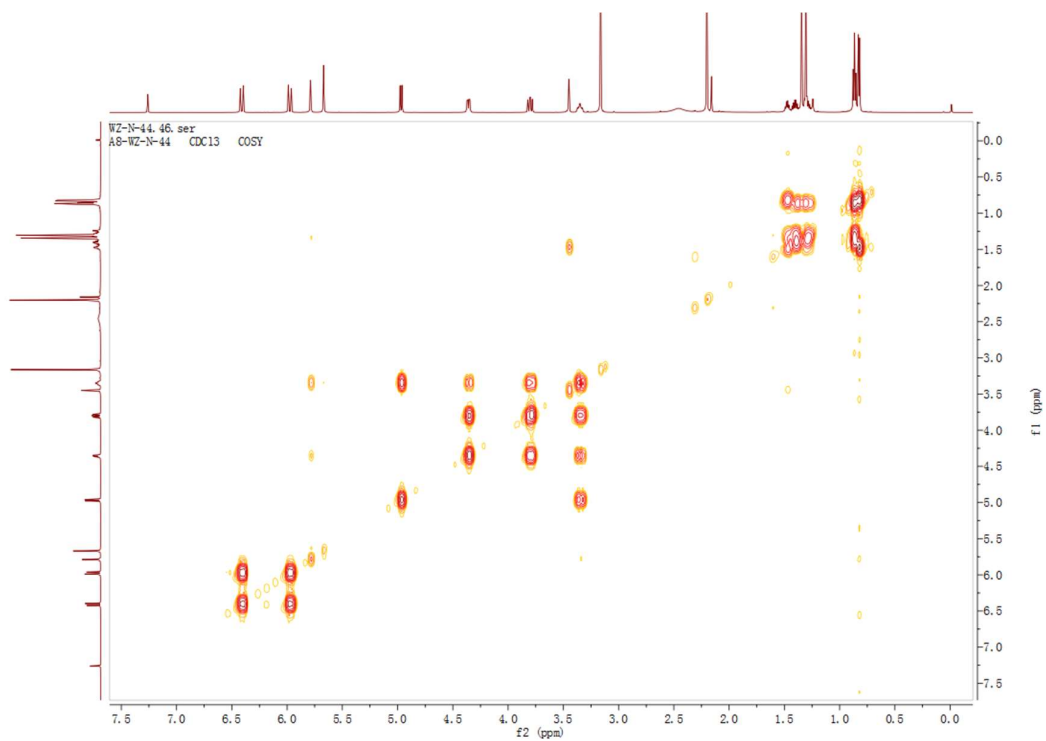

**Figure S35.** NOESY spectrum of compound **2**

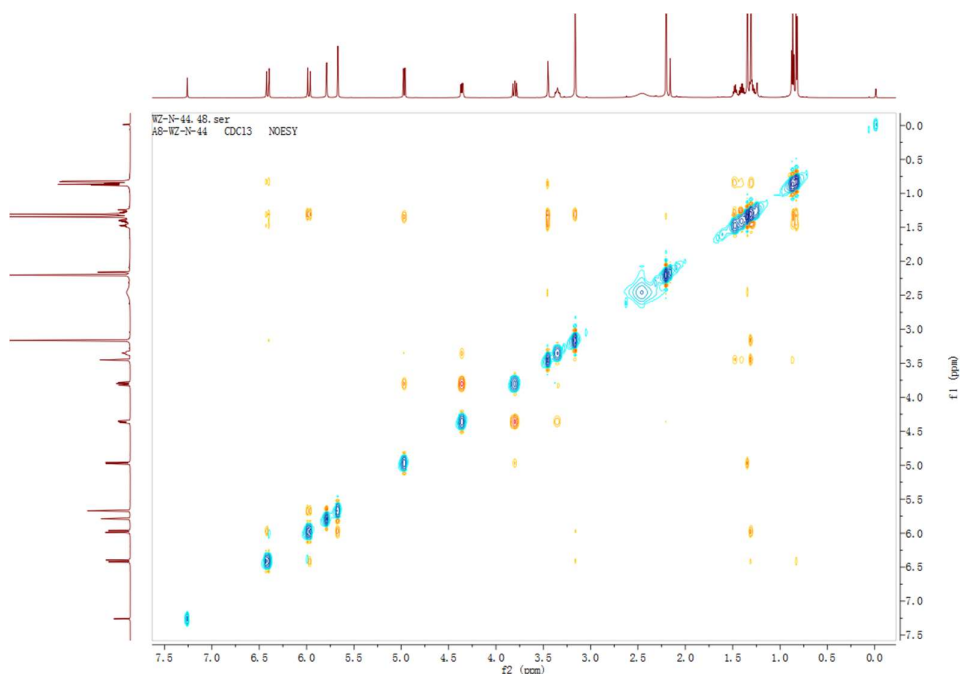

Figure S36. HRESIMS spectrum of compound 2

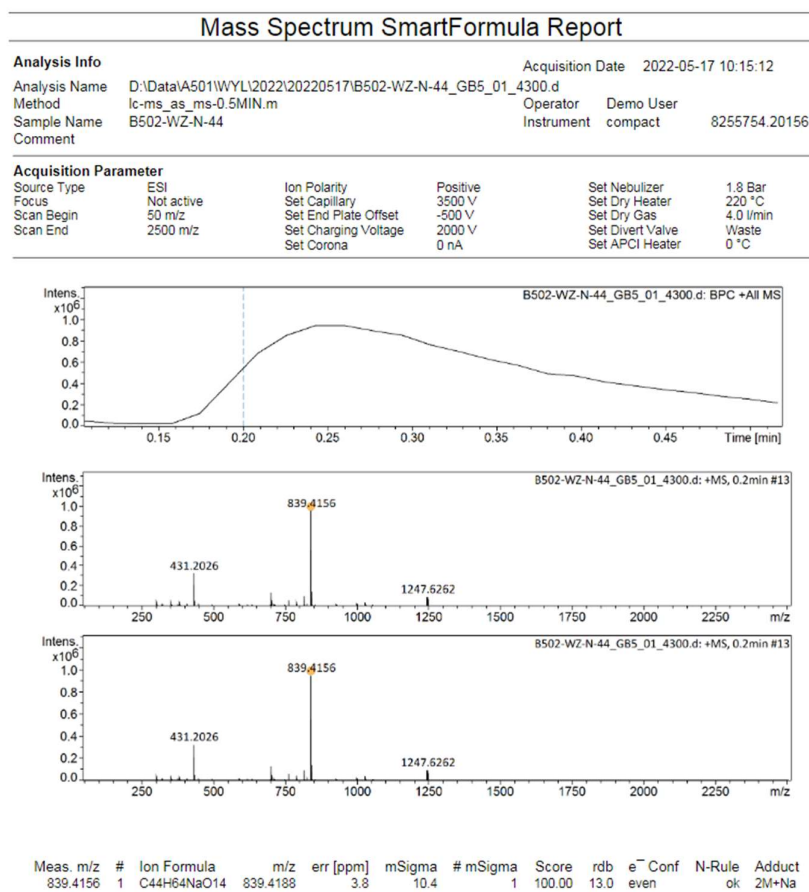



**Figure S37.** UV spectrum of compound **2**

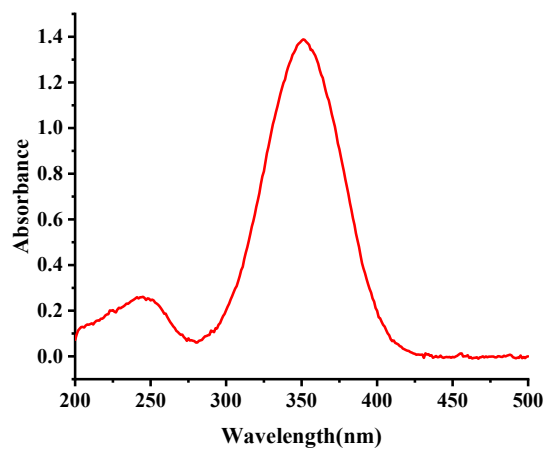

**Figure S38.** IR spectrum of compound **2**

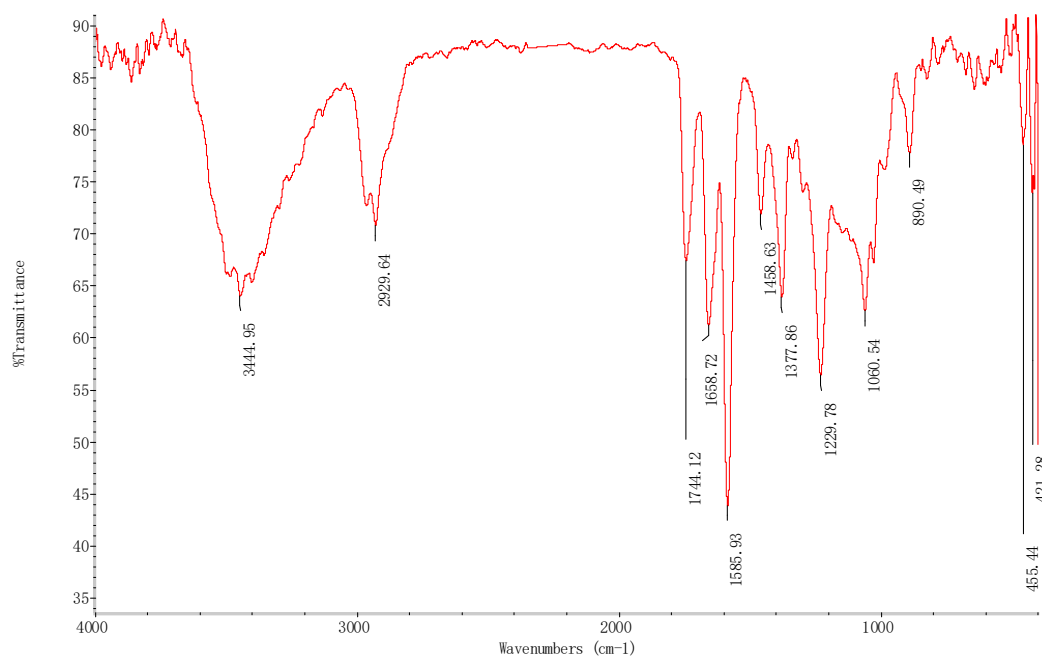

**Figure S39.** <sup>1</sup>H NMR (400 MHz, CDCl<sub>3</sub>) spectrum of compound **3**

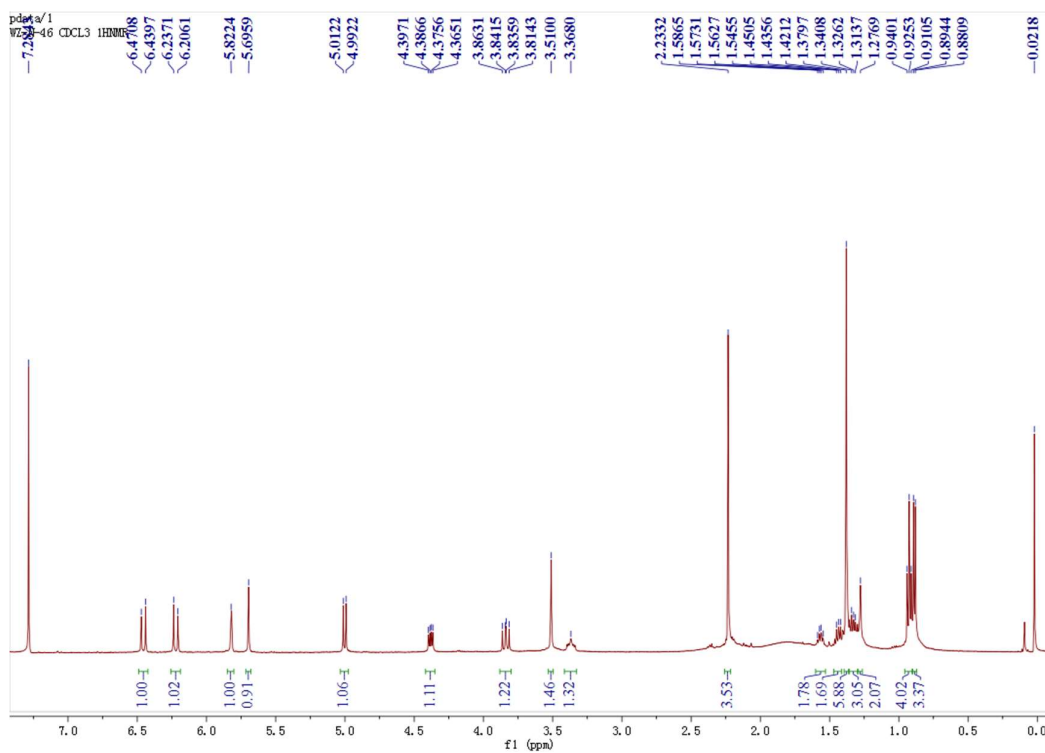

**Figure S40.** <sup>13</sup>C NMR (125 MHz, CDCl<sub>3</sub>) spectrum of compound **3**

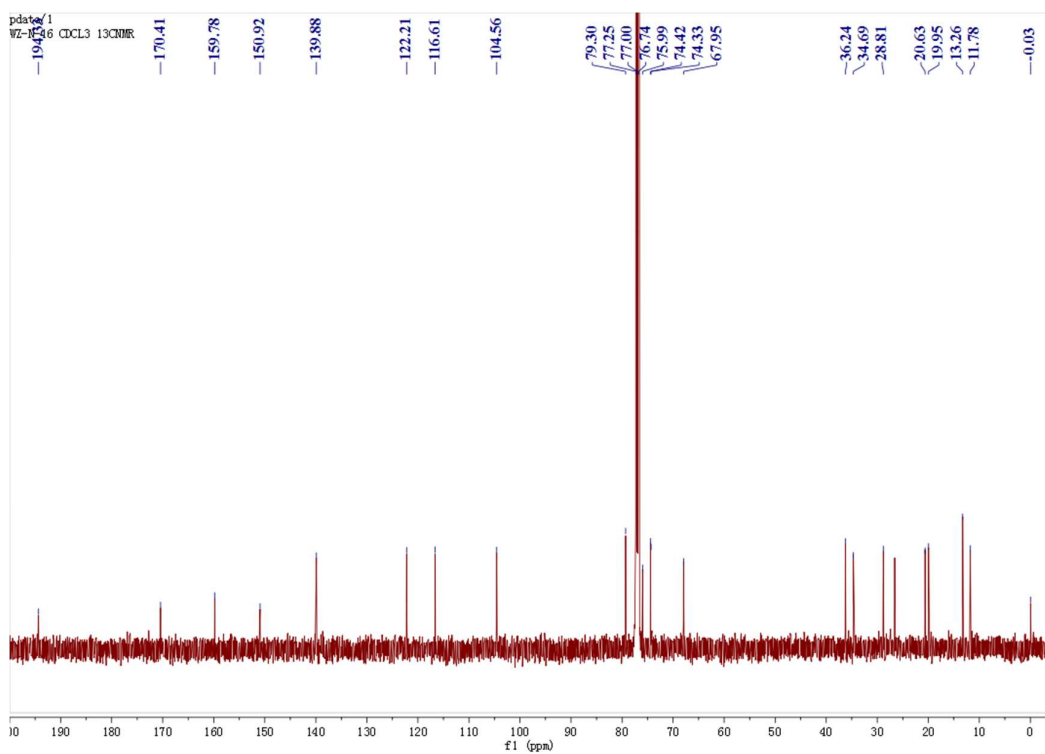

**Figure S41.** DEPT spectrum of compound **3**

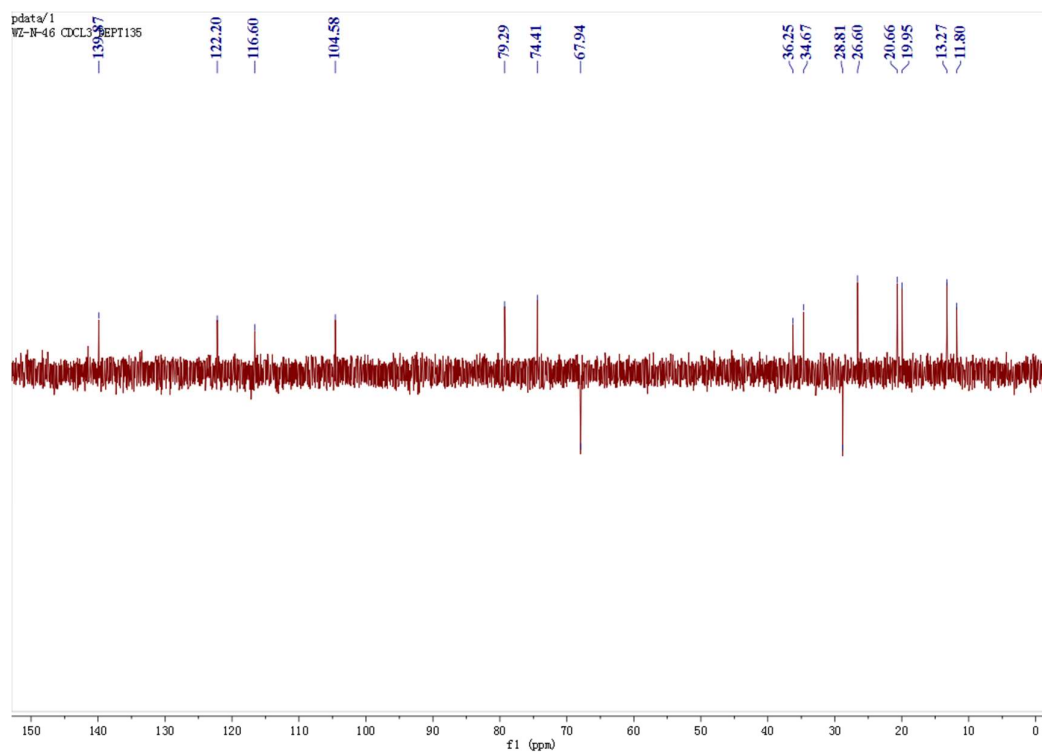

**Figure S42.** HSQC spectrum of compound **3**

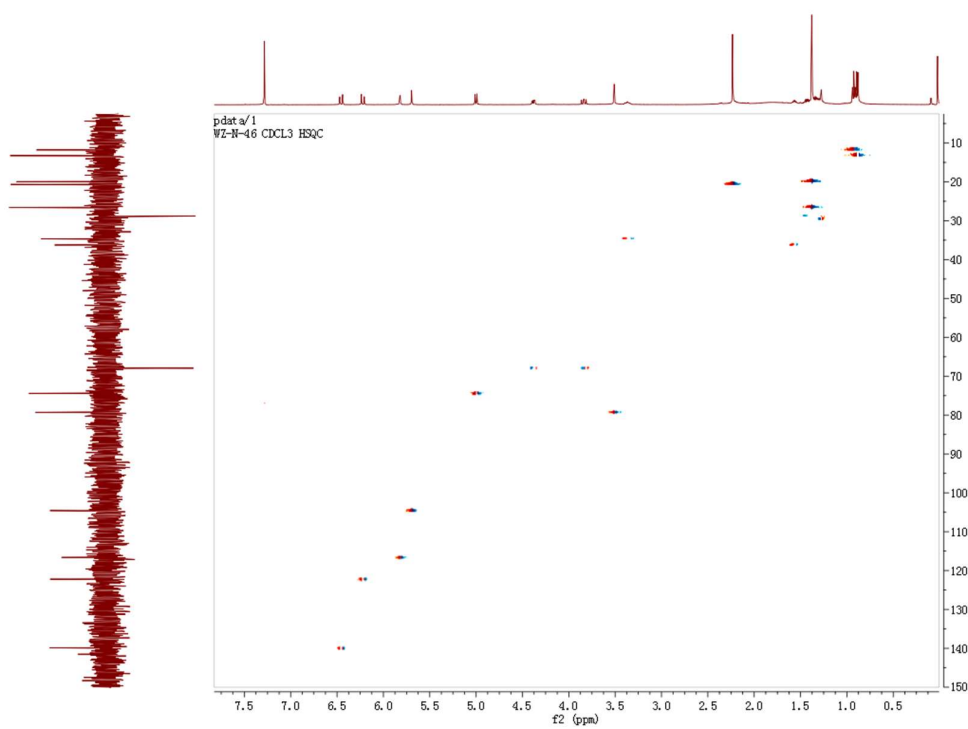

**Figure S43.** HMBC spectrum of compound **3**

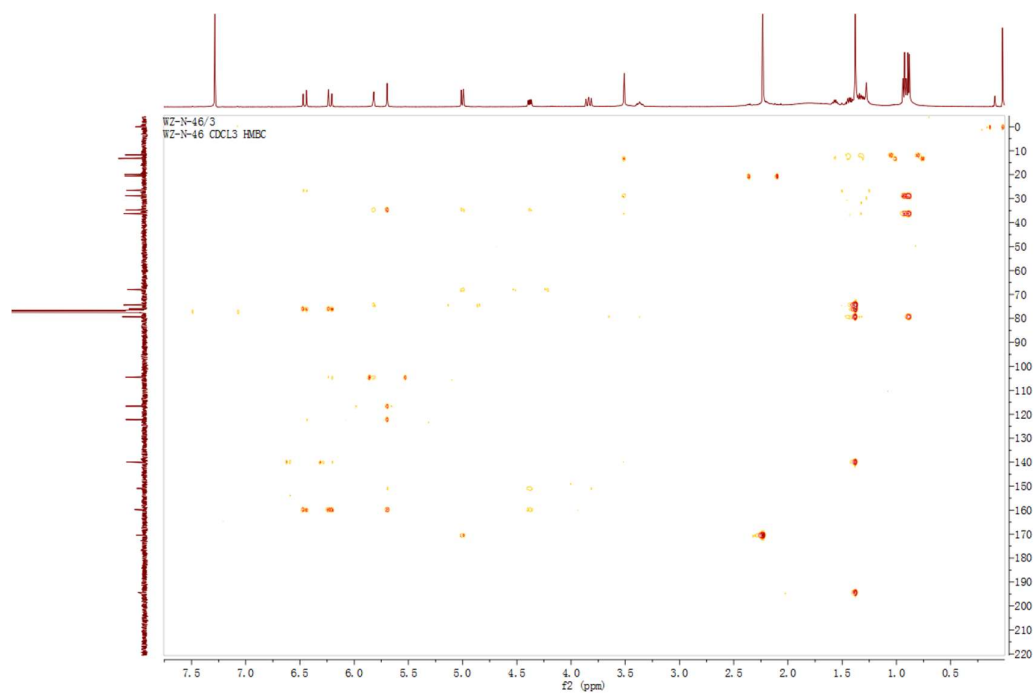

**Figure S44.**  $^1\text{H}$ - $^1\text{H}$  COSY spectrum of compound **3**

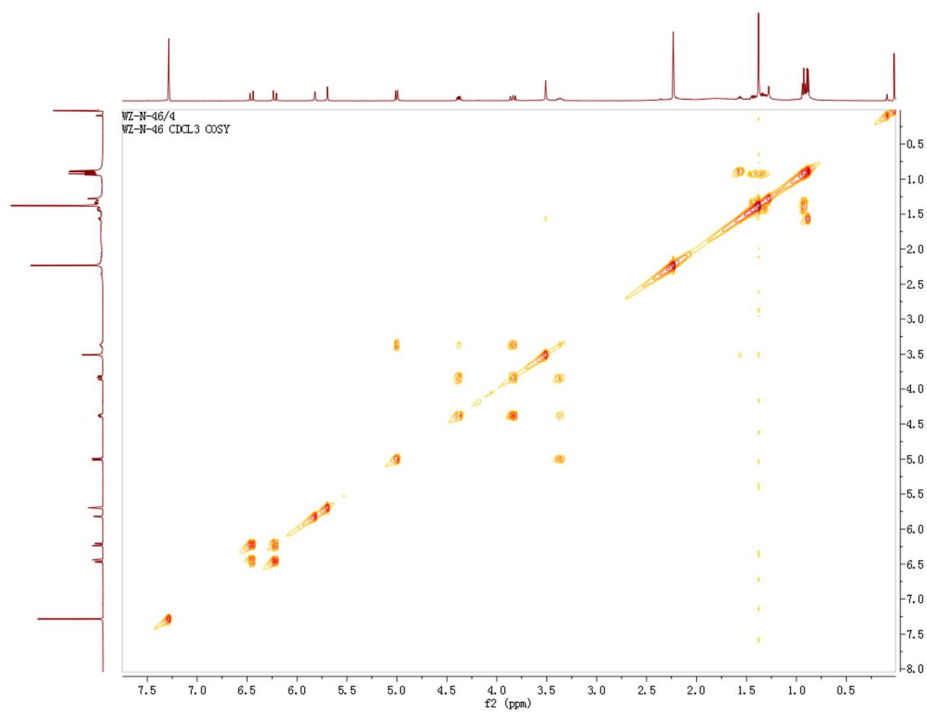

**Figure S45. ROESY spectrum of compound 3**

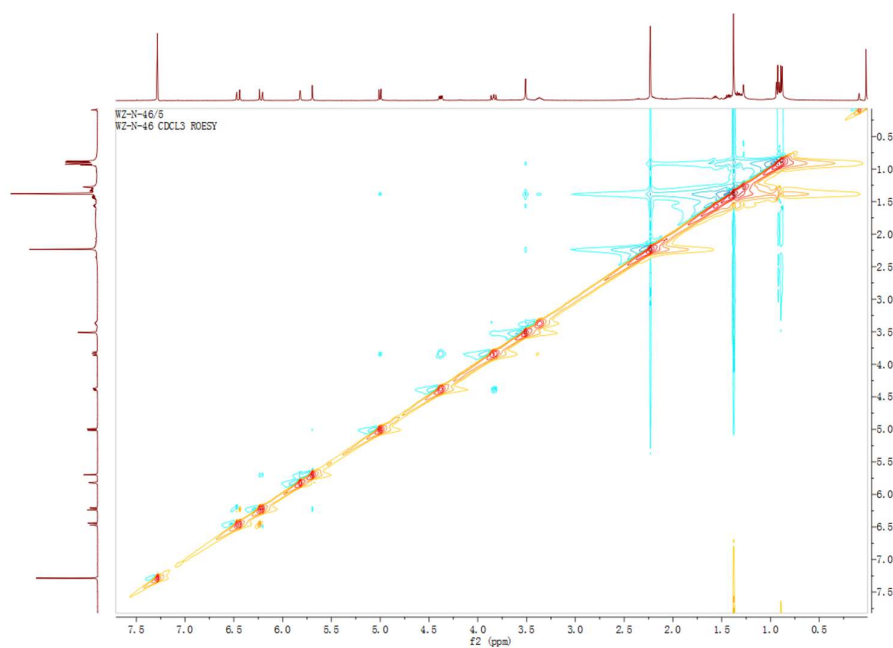

**Figure S46. HRESIMS spectrum of compound 3**

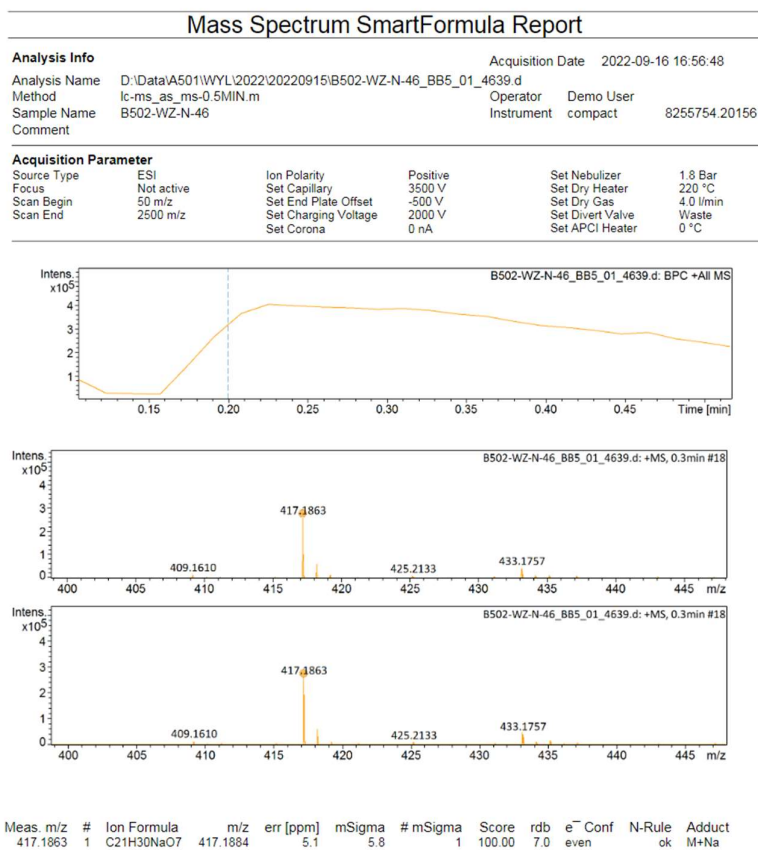

**Figure S47.** UV spectrum of compound **3**

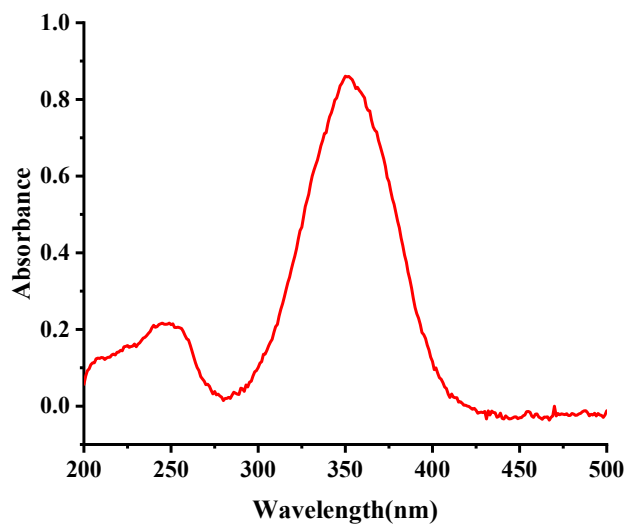

**Figure S48.** IR spectrum of compound **3**

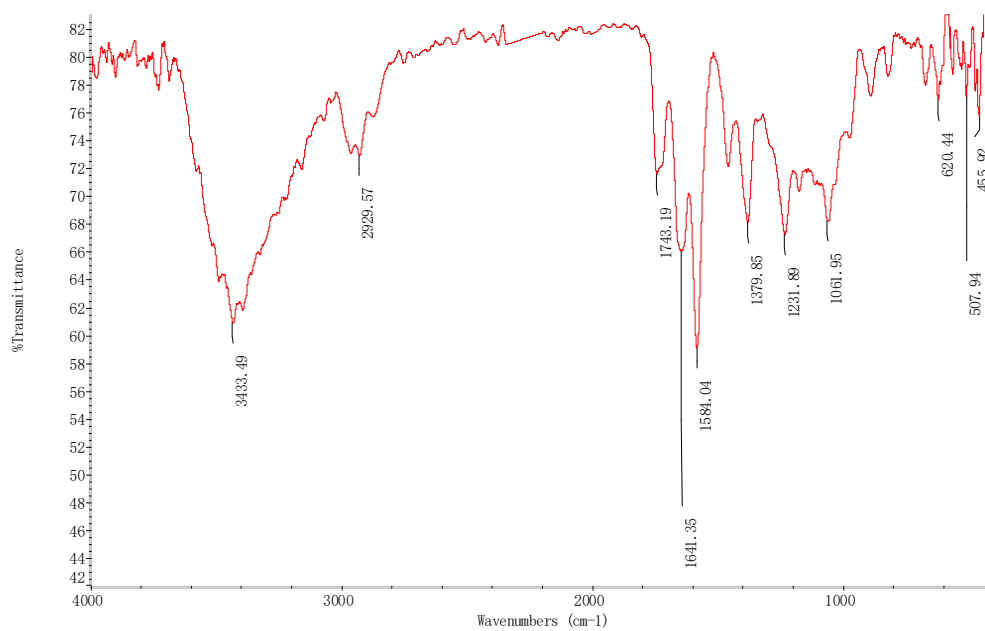

**Figure S49.** <sup>1</sup>H NMR (600 MHz, CDCl<sub>3</sub>) spectrum of compound **4**

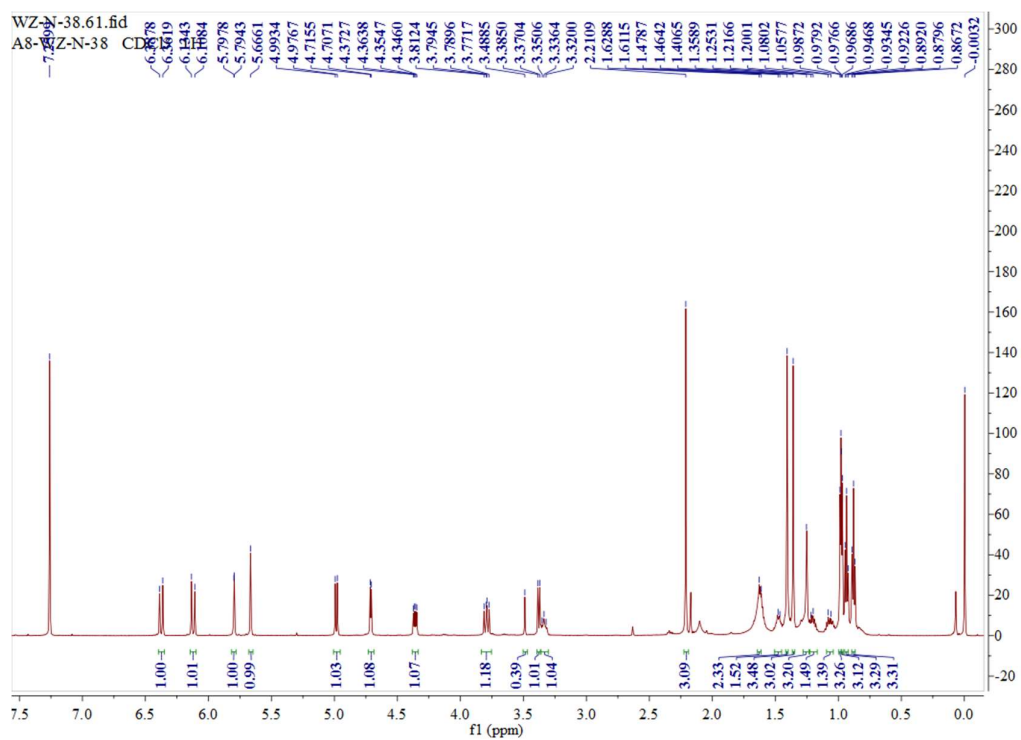

**Figure S50.** <sup>13</sup>C NMR (125 MHz, CDCl<sub>3</sub>) spectrum of compound **4**

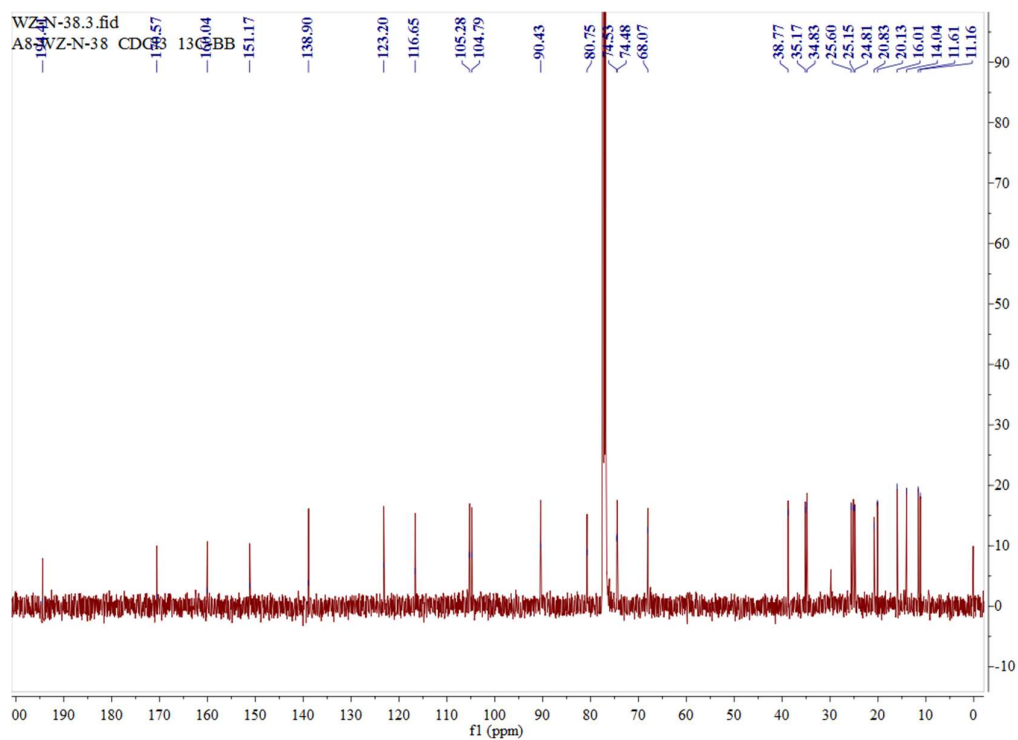

**Figure S51.** DEPT spectrum of compound **4**

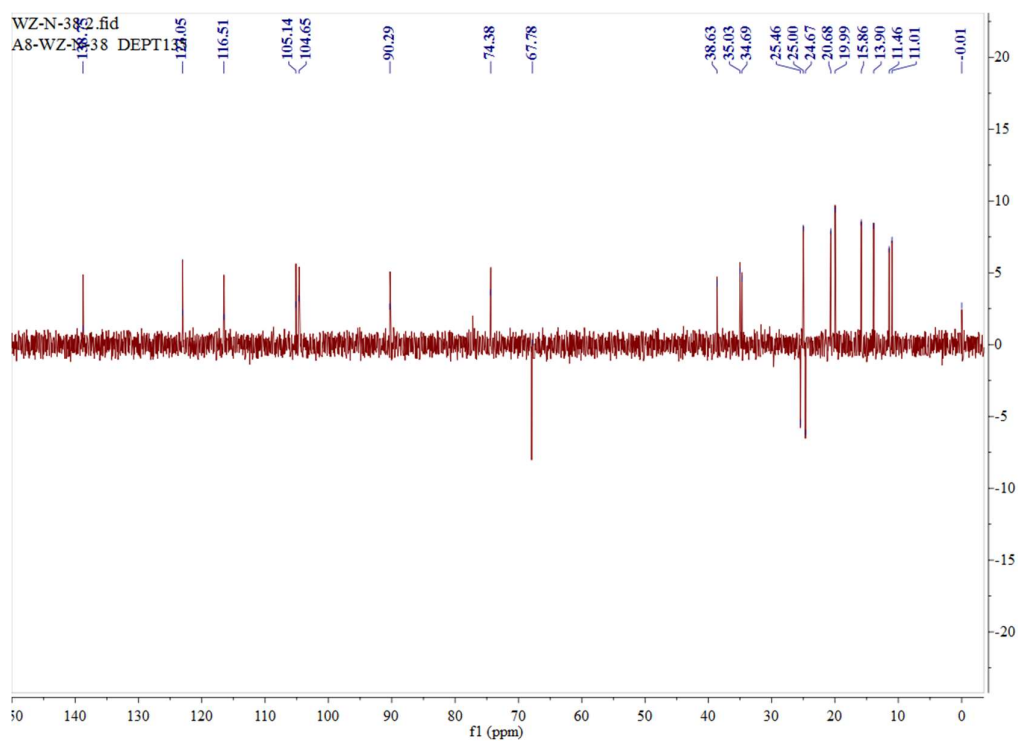

**Figure S52.** HSQC spectrum of compound **4**

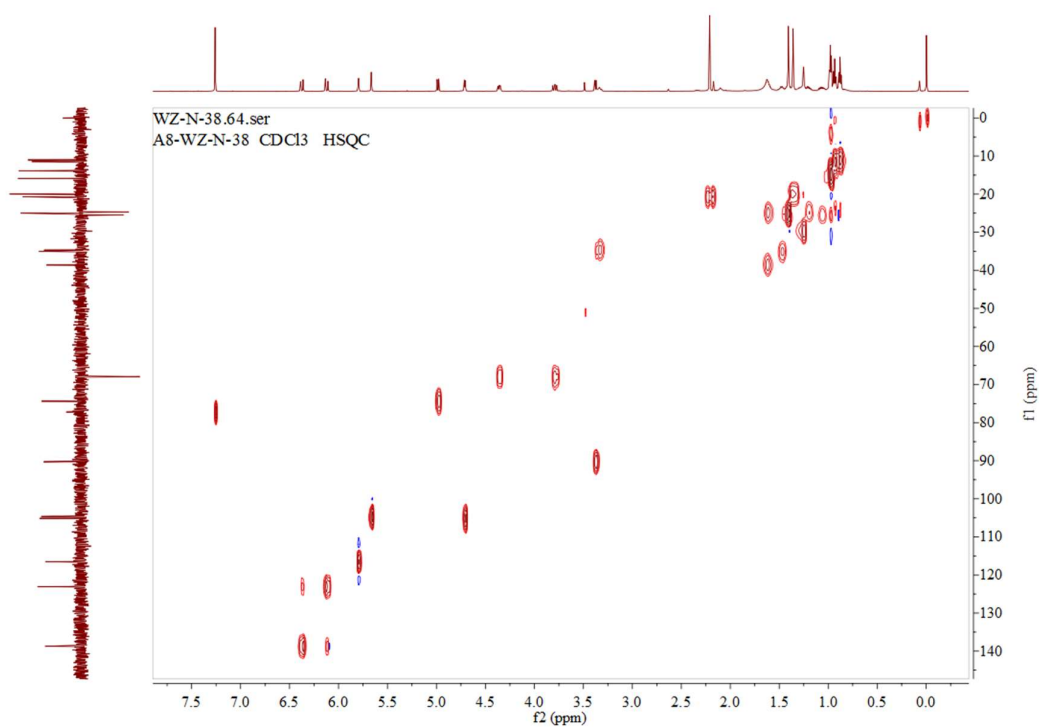



**Figure S53.** HMBC spectrum of compound **4**

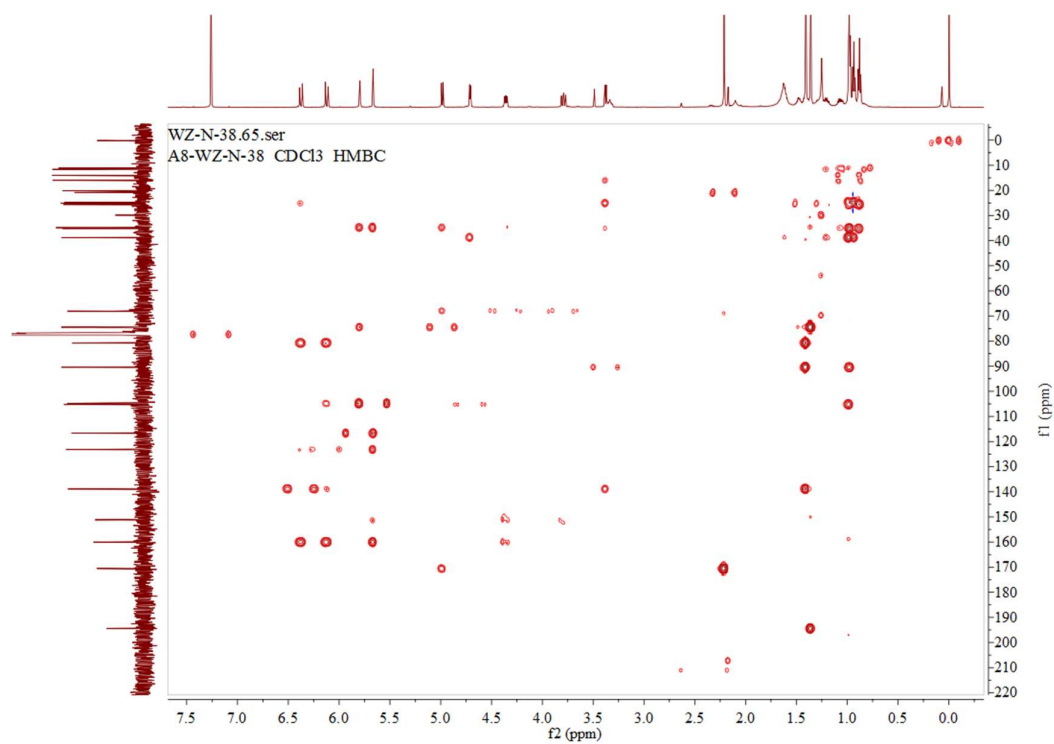

**Figure S54.** <sup>1</sup>H-<sup>1</sup>H COSY spectrum of compound **4**

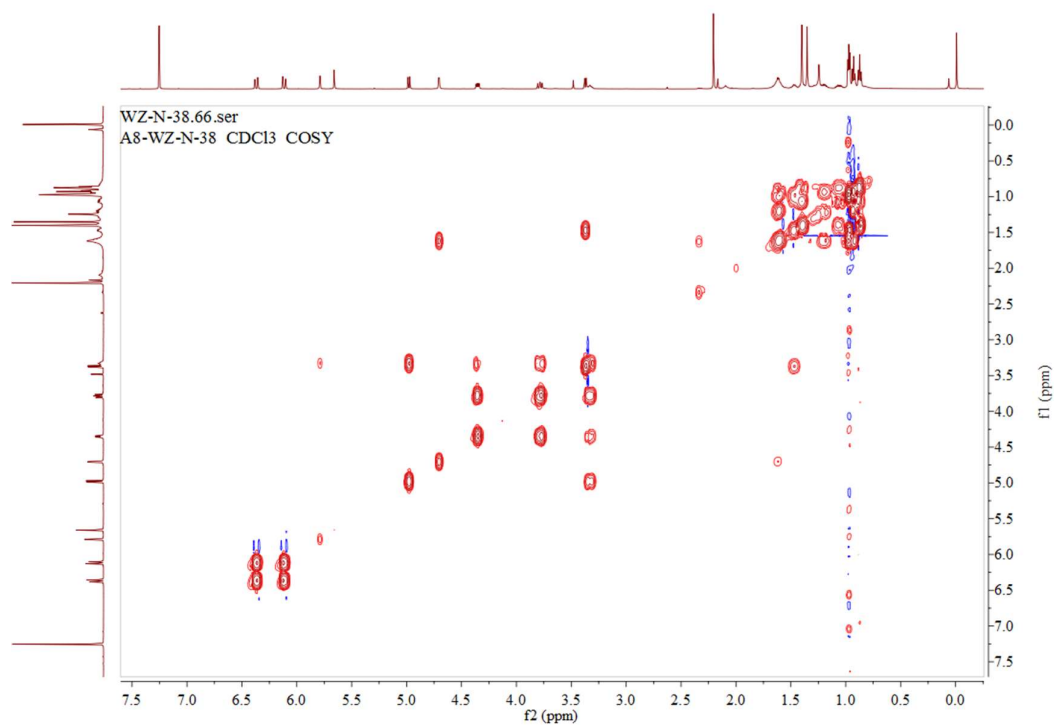

**Figure S55.** NOESY spectrum of compound **4**

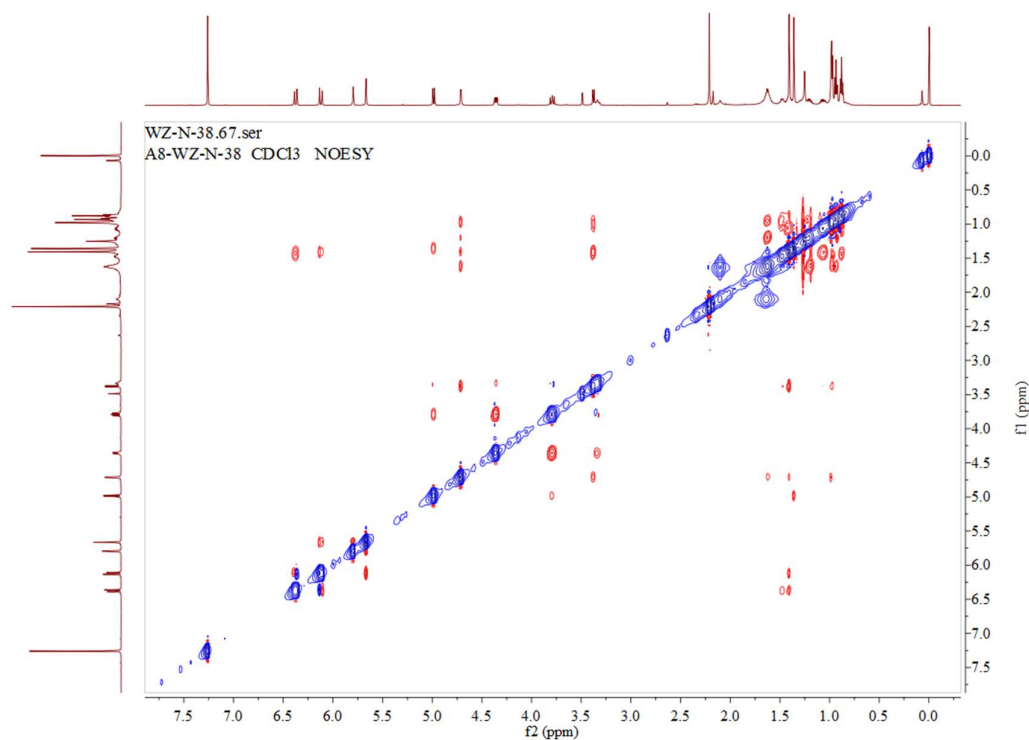

**Figure S56.** HRESIMS spectrum of compound **4**

#### Qualitative Analysis Report

|                        |                                        |                               |                             |
|------------------------|----------------------------------------|-------------------------------|-----------------------------|
| <b>Data Filename</b>   | ESI202104665.d                         | <b>Sample Name</b>            | A8-A8-WZ-N-38               |
| <b>Sample ID</b>       |                                        | <b>Position</b>               | P1-D3                       |
| <b>Instrument Name</b> | Agilent G6520 Q-TOF                    | <b>Acq Method</b>             | 20160322_MS_ESI2_POS_1min.m |
| <b>Acquired Time</b>   | 10/20/2021 20:34:10                    | <b>IRM Calibration Status</b> | Success                     |
| <b>DA Method</b>       | small molecular data analysis method.m | <b>Comment</b>                | ESI2 by zhuzhenyun          |

#### User Spectra

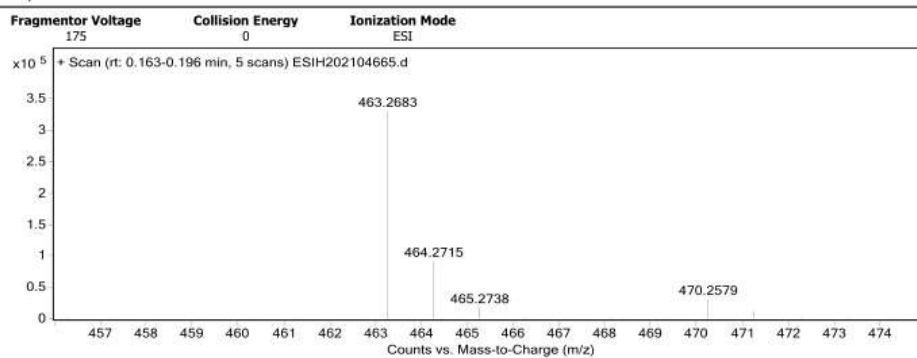

#### Formula Calculator Results

| m/z      | Calc m/z | Diff (mDa) | Diff (ppm) | Ion Formula                                    | Ion                |
|----------|----------|------------|------------|------------------------------------------------|--------------------|
| 463.2683 | 463.269  | 0.68       | 1.47       | C <sub>26</sub> H <sub>39</sub> O <sub>7</sub> | (M+H) <sup>+</sup> |

--- End Of Report ---

**Figure S57.** UV spectrum of compound **4**

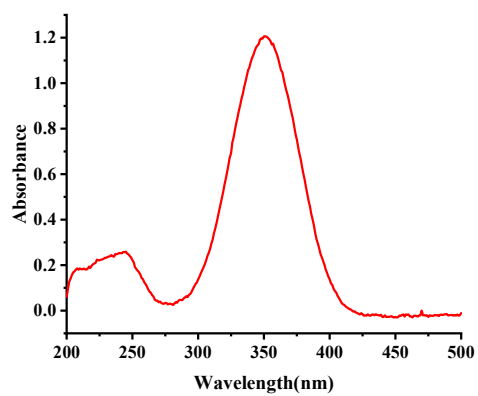

**Figure S58.** IR spectrum of compound **4**

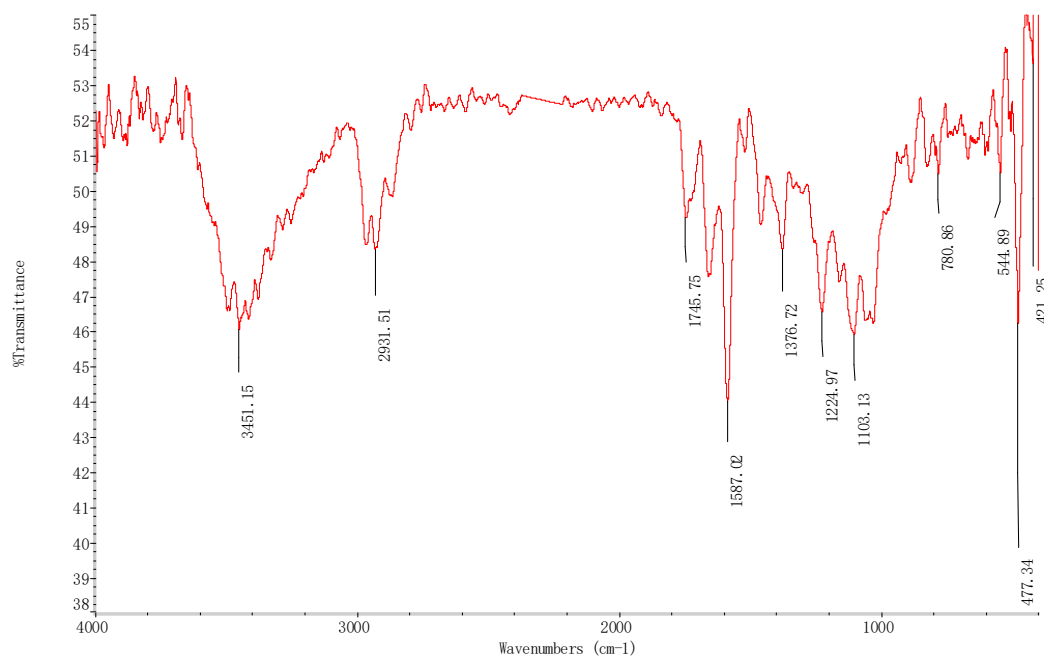

**Figure S59.**  $^1\text{H}$  NMR (600 MHz,  $\text{CDCl}_3$ ) spectrum of compound **5**

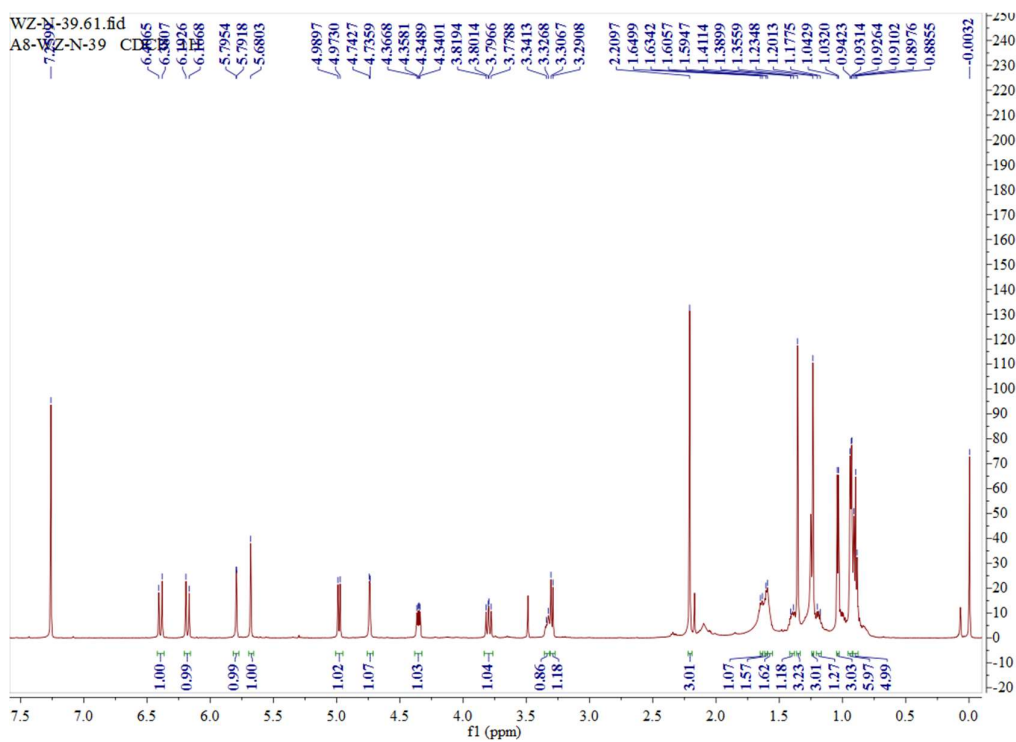

**Figure S60.**  $^{13}\text{C}$  NMR (125 MHz,  $\text{CDCl}_3$ ) spectrum of compound **5**

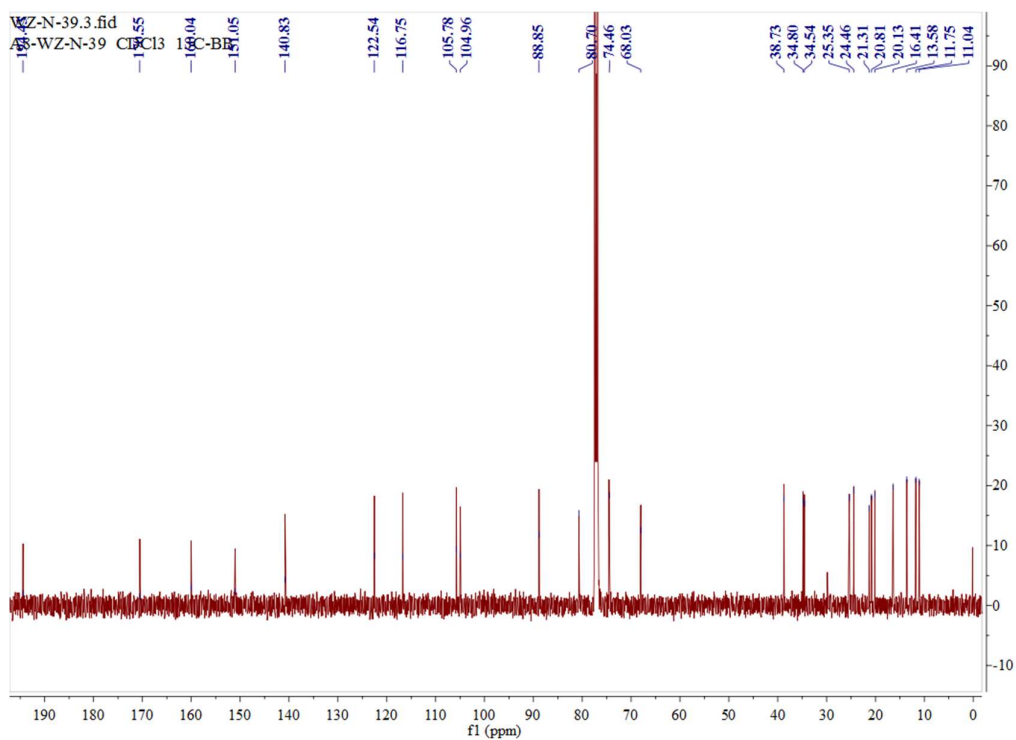

**Figure S61.** DEPT spectrum of compound **5**

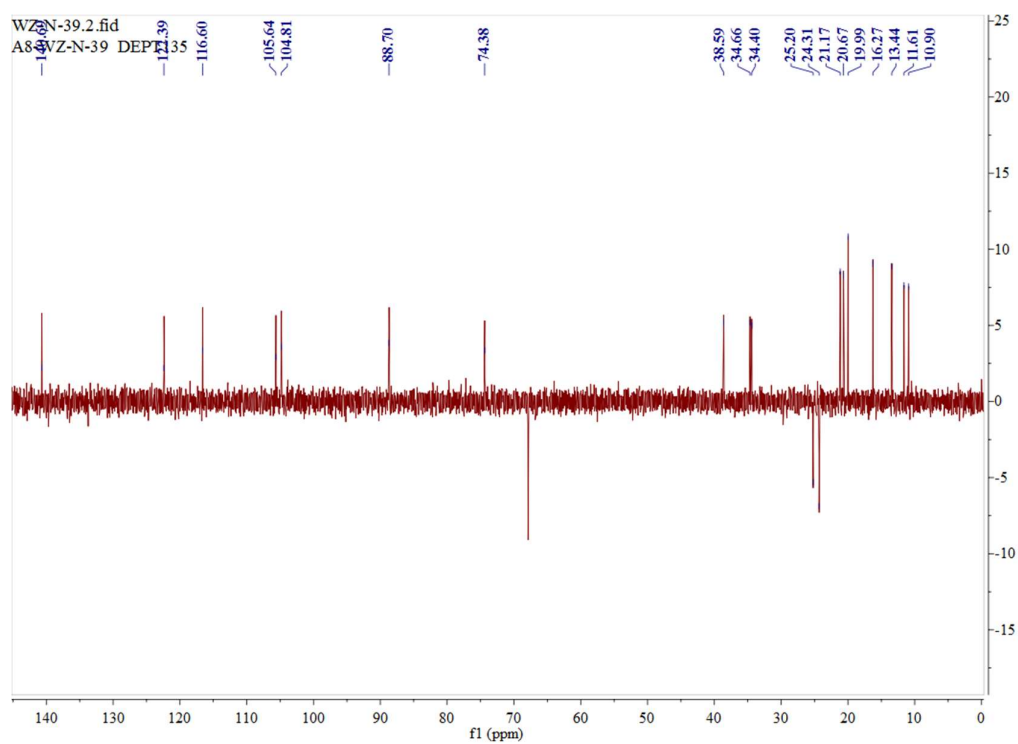

**Figure S62.** HSQC spectrum of compound **5**

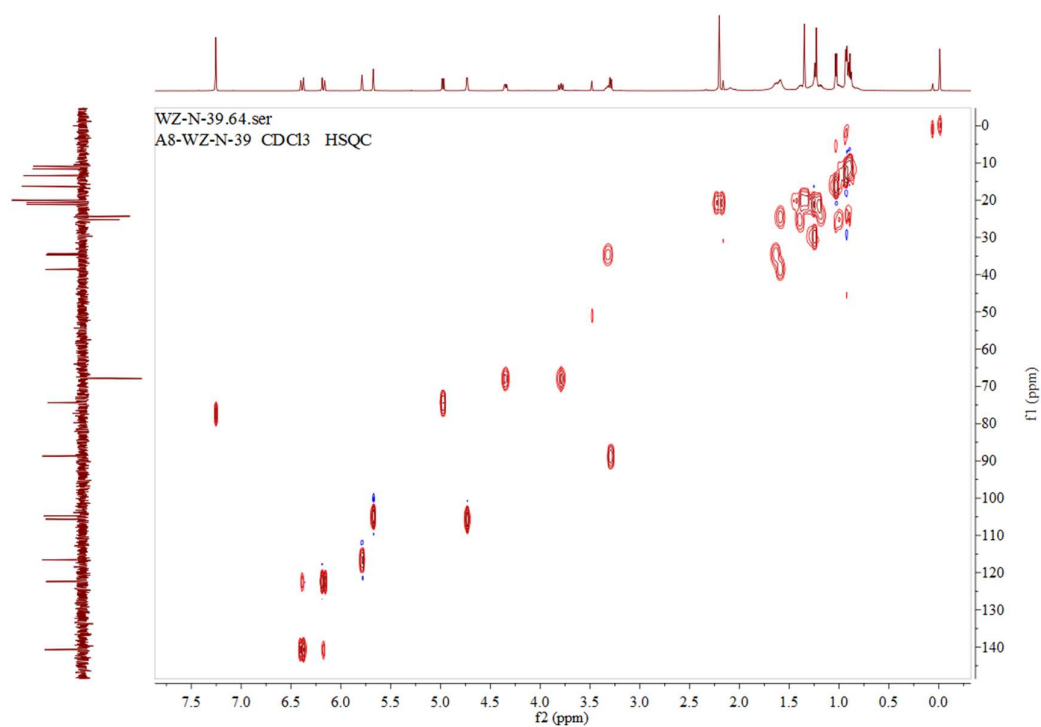

**Figure S63.** HMBC spectrum of compound **5**

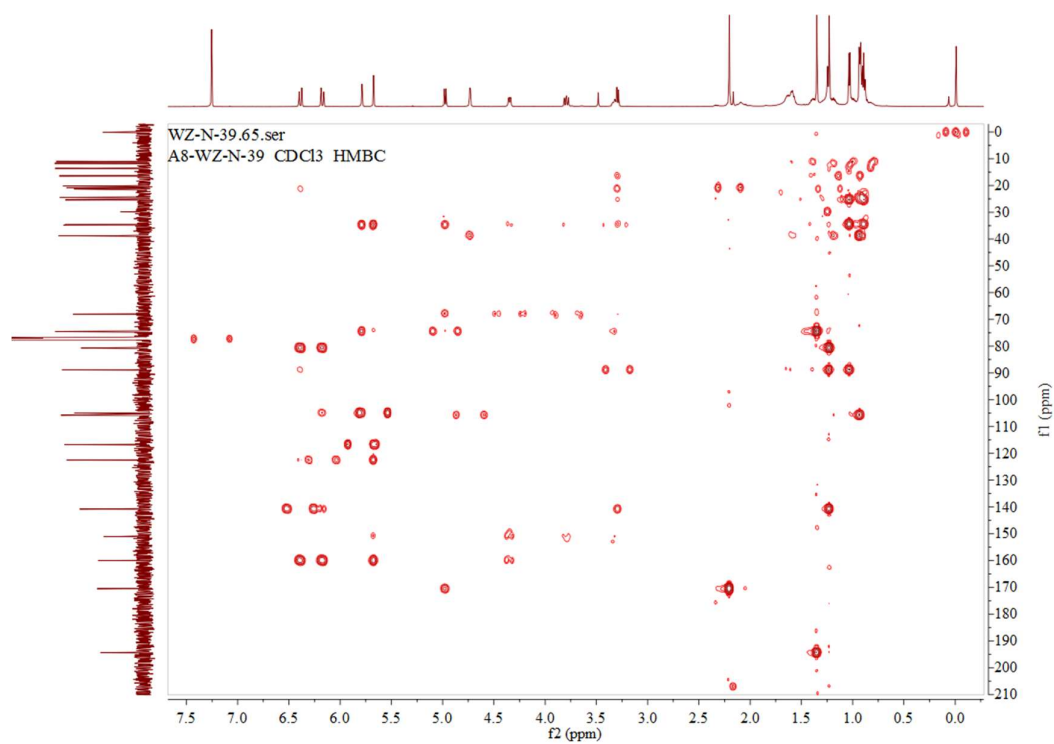

**Figure S64.** <sup>1</sup>H-<sup>1</sup>H COSY spectrum of compound **5**

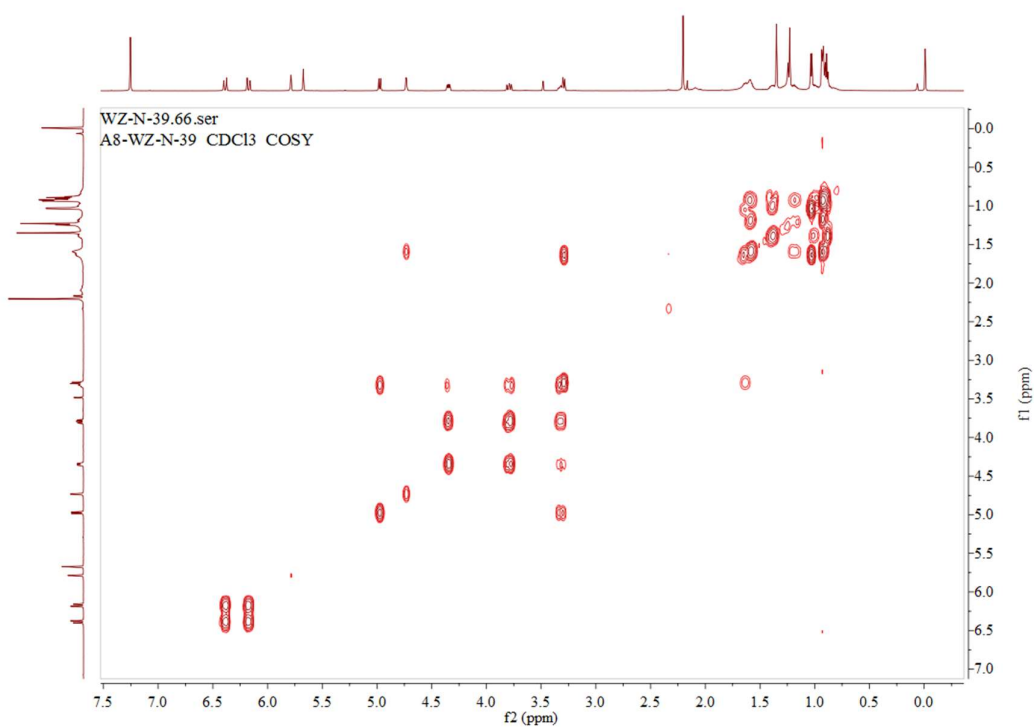

**Figure S65.** NOESY spectrum of compound **5**

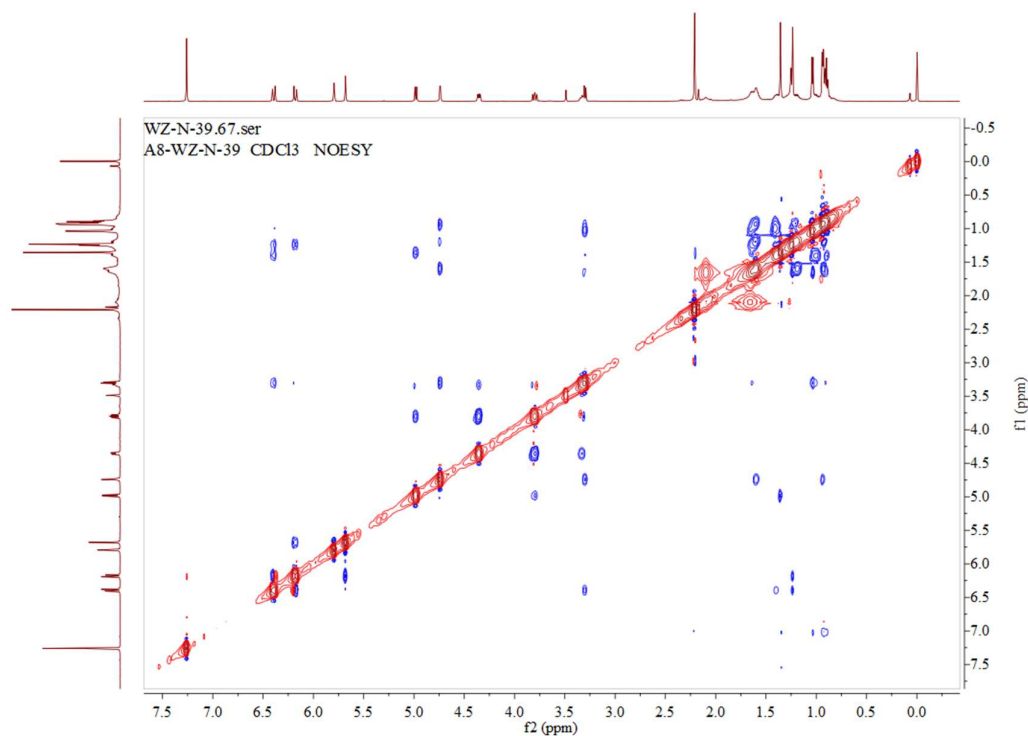

**Figure S66.** HRESIMS spectrum of compound **5**

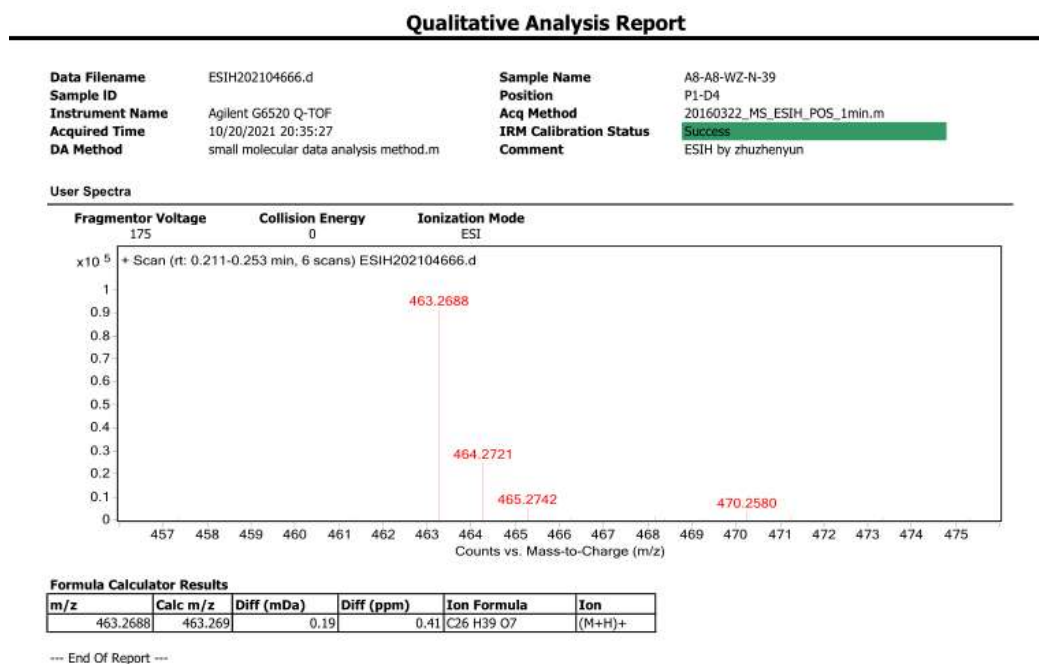

**Figure S67.** UV spectrum of compound **5**

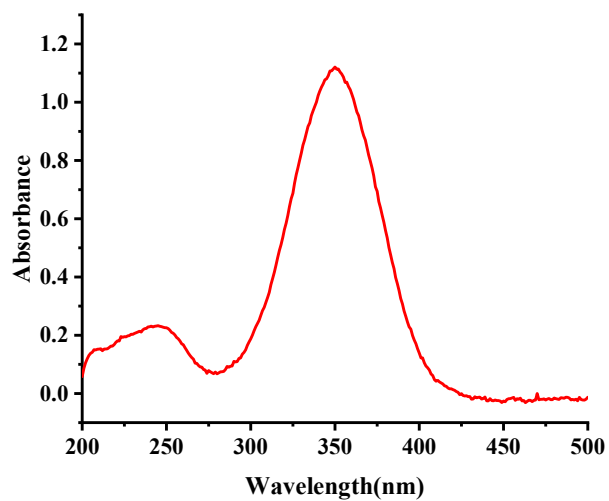

**Figure S68.** IR spectrum of compound **5**

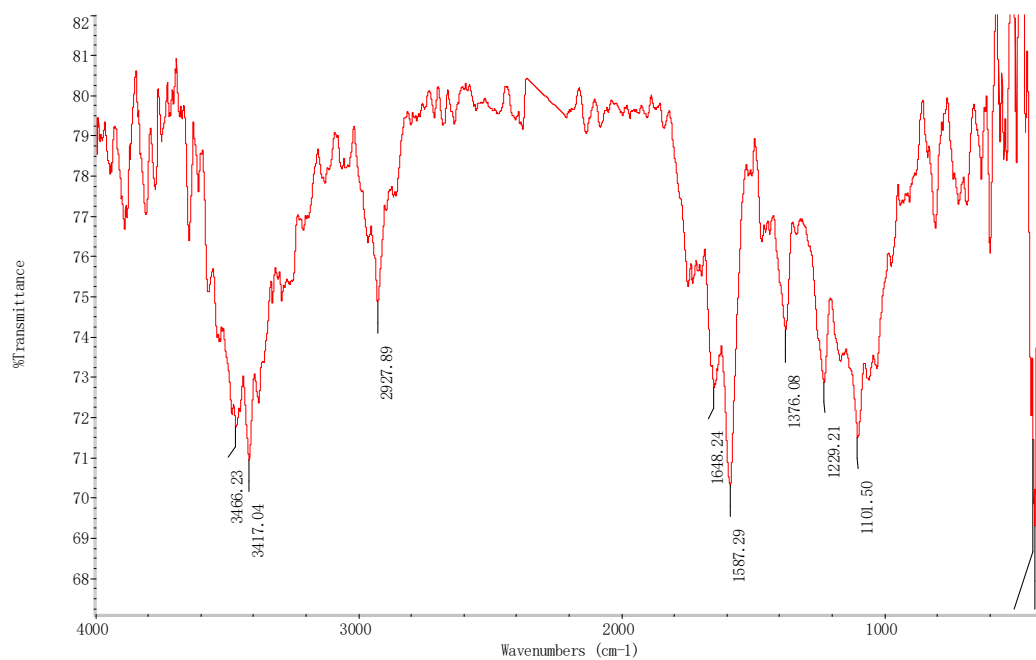



**Figure S69.**  $^1\text{H}$  NMR (600 MHz,  $\text{CDCl}_3$ ) spectrum of compound **6**

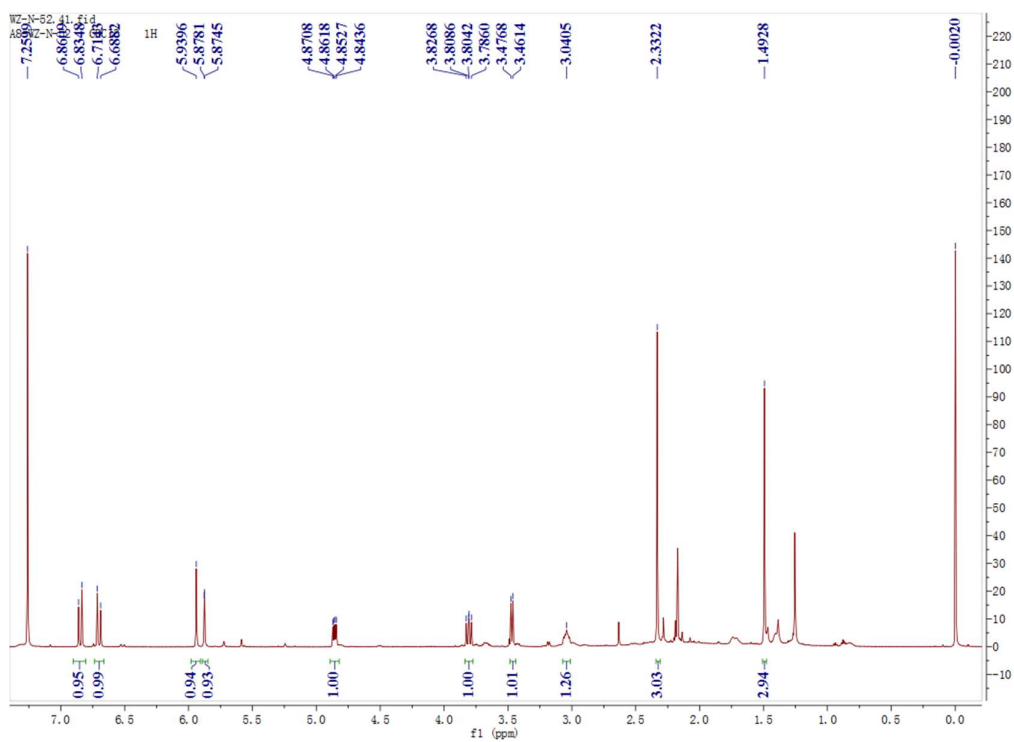

**Figure S70.**  $^{13}\text{C}$  NMR (125 MHz,  $\text{CDCl}_3$ ) spectrum of compound **6**

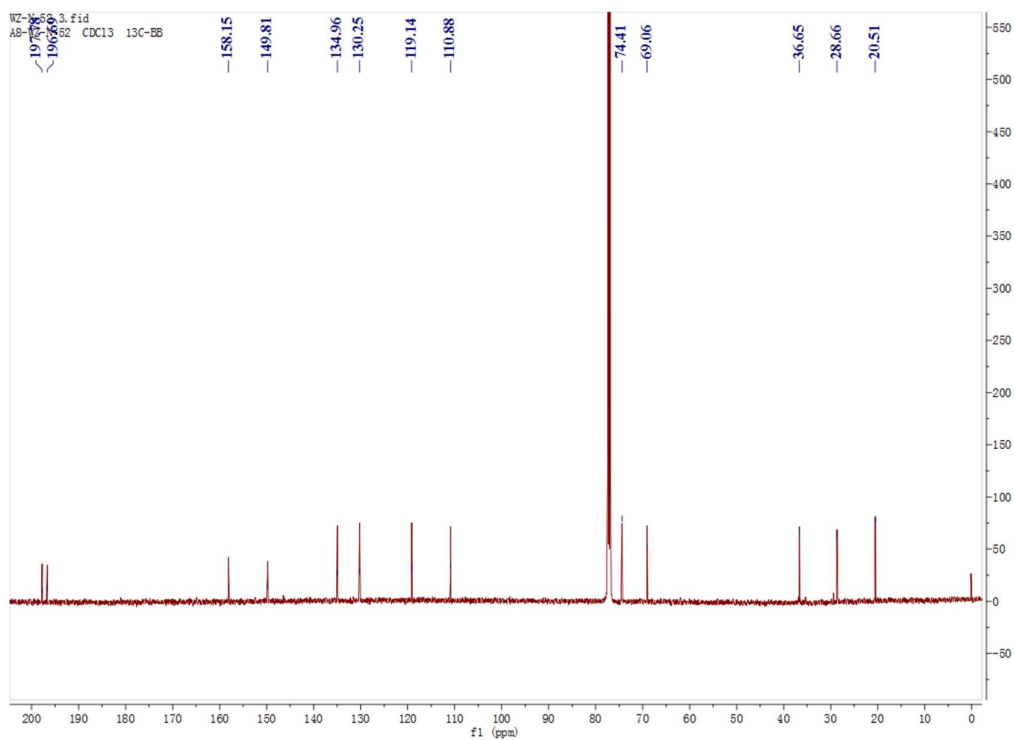

**Figure S71.** DEPT spectrum of compound **6**

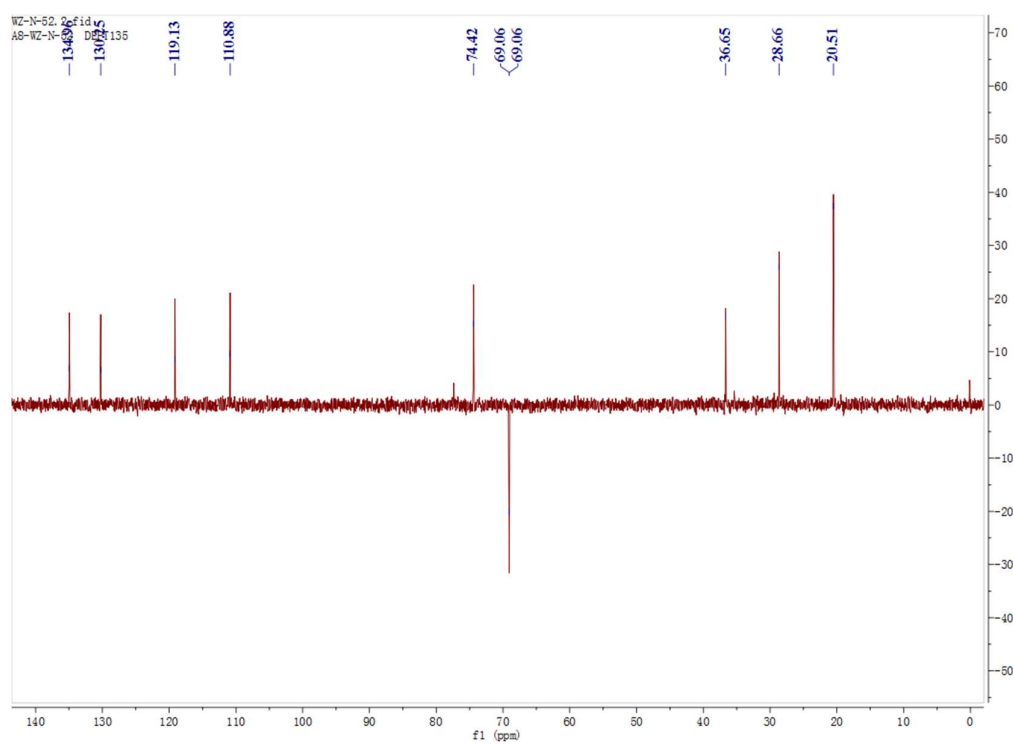

**Figure S72.** HSQC spectrum of compound **6**

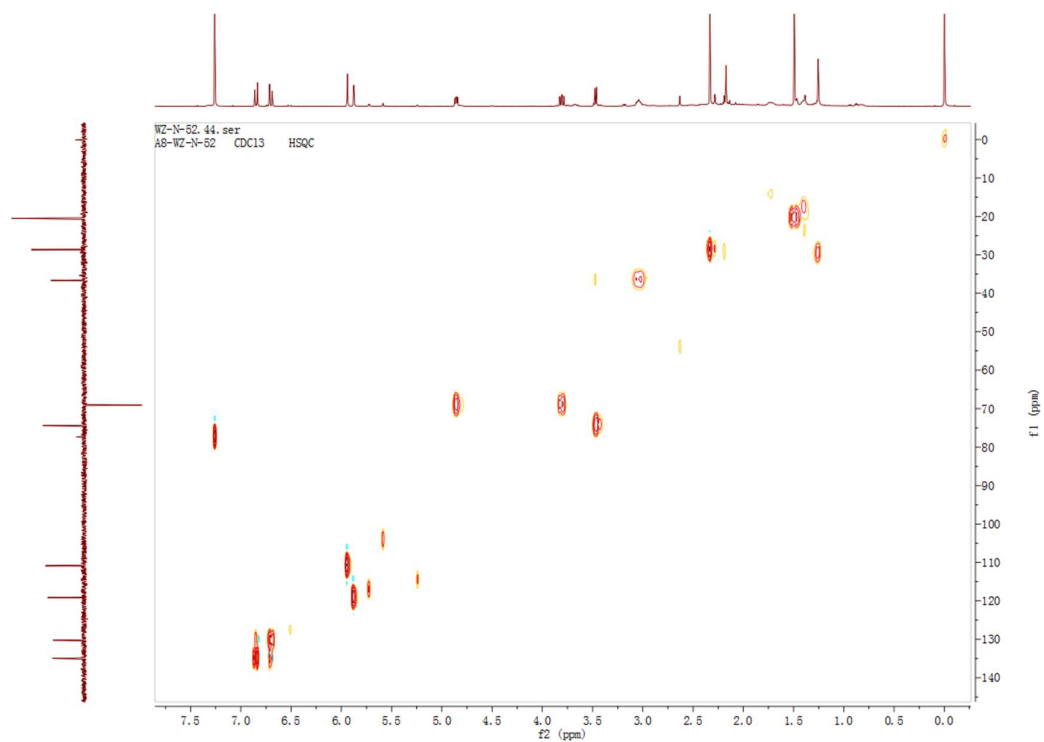

**Figure S73.** HMBC spectrum of compound **6**

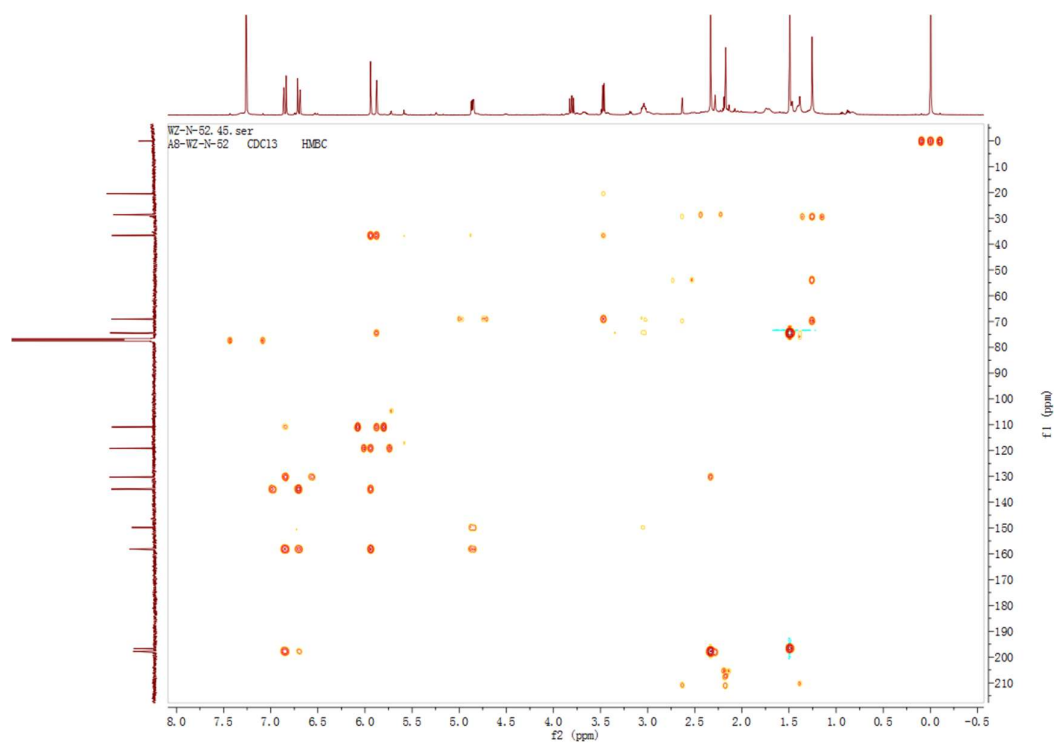

**Figure S74.**  $^1\text{H}$ - $^1\text{H}$  COSY spectrum of compound **6**

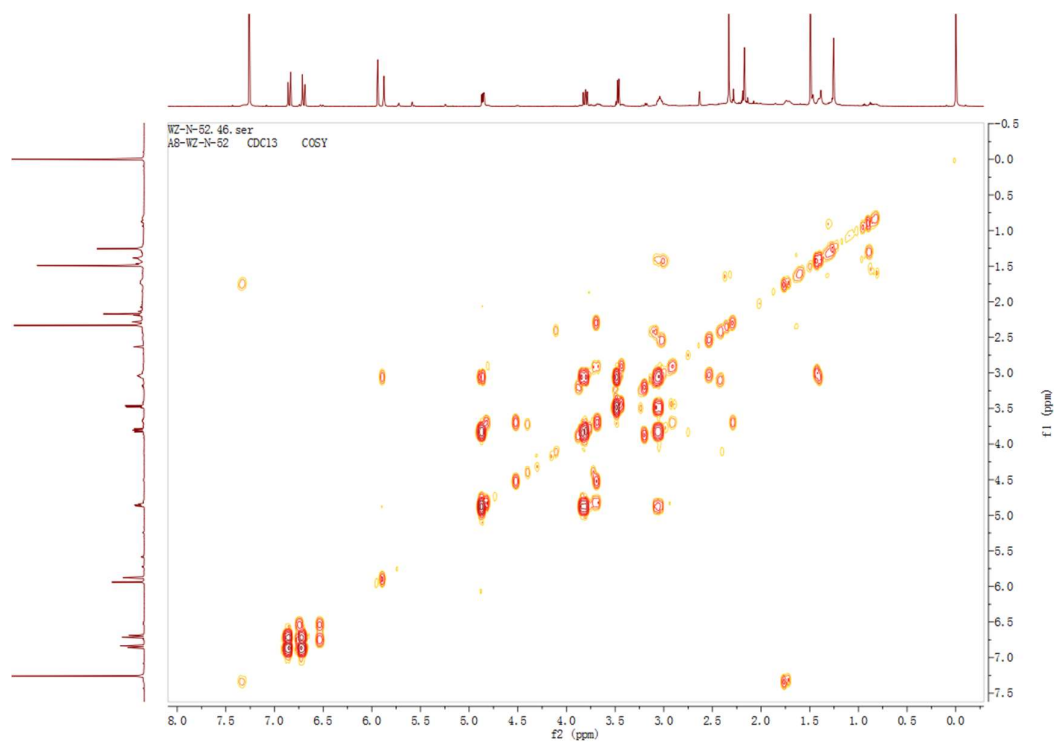

**Figure S75.** NOESY spectrum of compound **6**

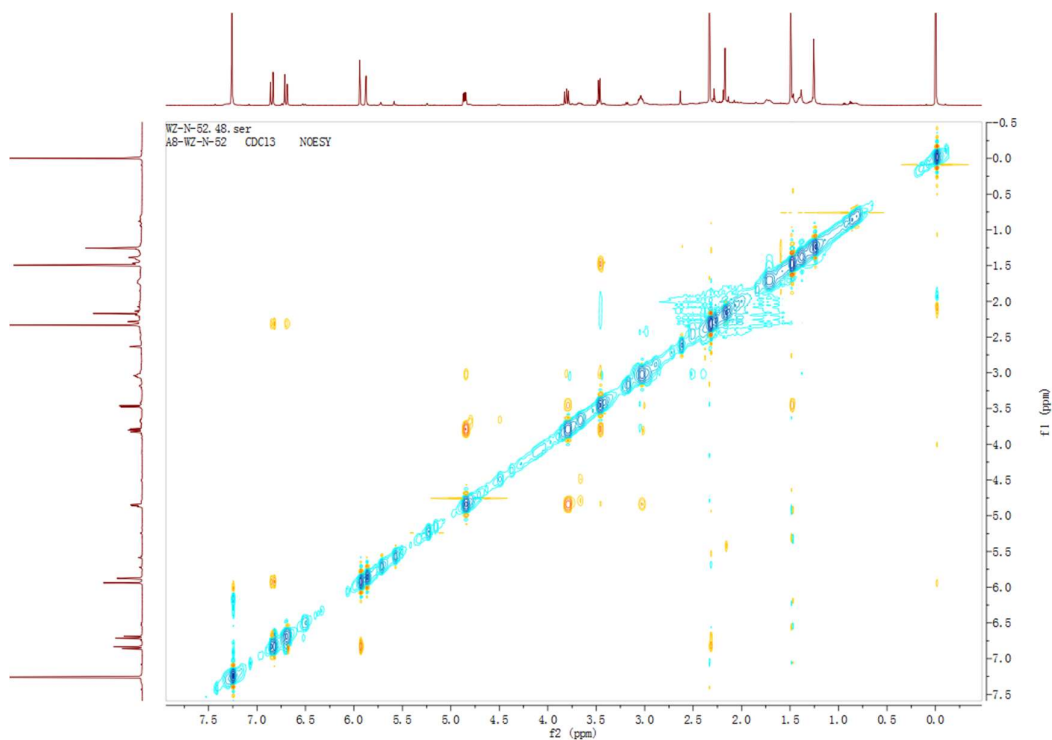

**Figure S76.** HRESIMS spectrum of compound **6**

#### Qualitative Analysis Report

|                        |                                        |                               |                             |
|------------------------|----------------------------------------|-------------------------------|-----------------------------|
| <b>Data Filename</b>   | ESI202105122.d                         | <b>Sample Name</b>            | A8-WZ-N-52                  |
| <b>Sample ID</b>       |                                        | <b>Position</b>               | P1-A2                       |
| <b>Instrument Name</b> | Agilent G6520 Q-TOF                    | <b>Acq Method</b>             | 20160322_MS_ESIH_POS_1min.m |
| <b>Acquired Time</b>   | 11/24/2021 13:55:43                    | <b>IRM Calibration Status</b> | Success                     |
| <b>DA Method</b>       | small molecular data analysis method.m | <b>Comment</b>                | ESIH by fangsu              |

#### User Spectra

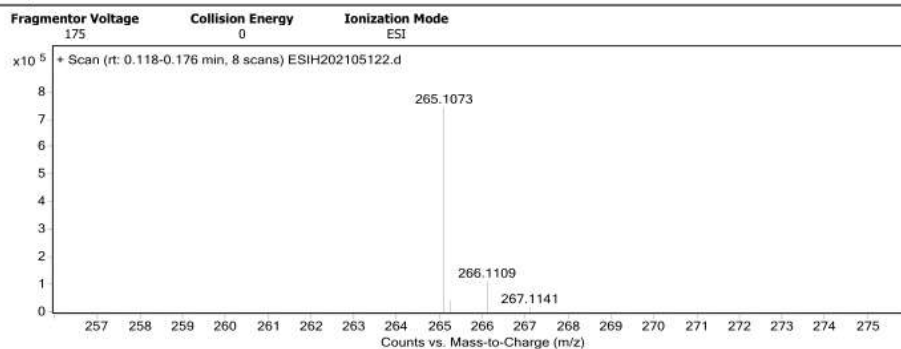

#### Formula Calculator Results

| m/z      | Calc m/z | Diff (mDa) | Diff (ppm) | Ion Formula | Ion    |
|----------|----------|------------|------------|-------------|--------|
| 265.1073 | 265.1071 | -0.25      | -0.93      | C14 H17 O5  | (M+H)+ |

--- End Of Report ---

**Figure S77.** UV spectrum of compound **6**

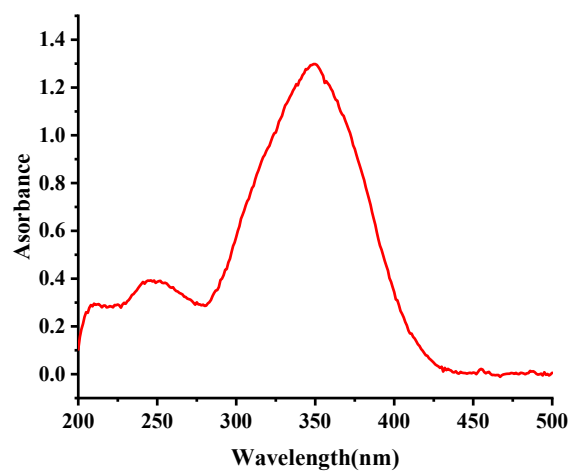

**Figure S78.** IR spectrum of compound **6**

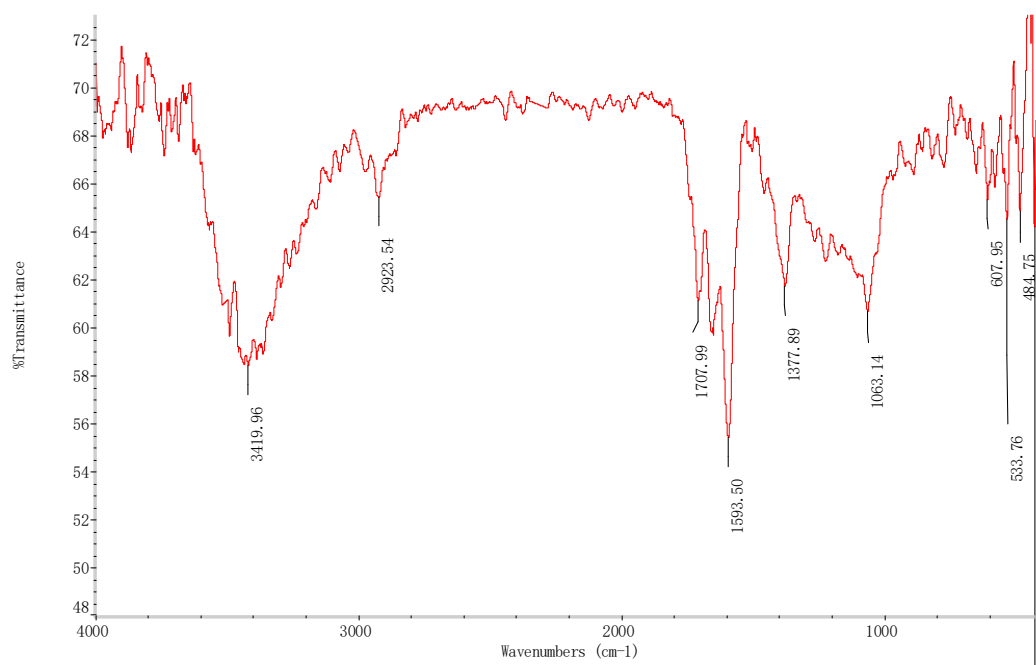

**Figure S79.**  $^1\text{H}$  NMR (600 MHz,  $\text{CDCl}_3$ ) spectrum of compound **7**

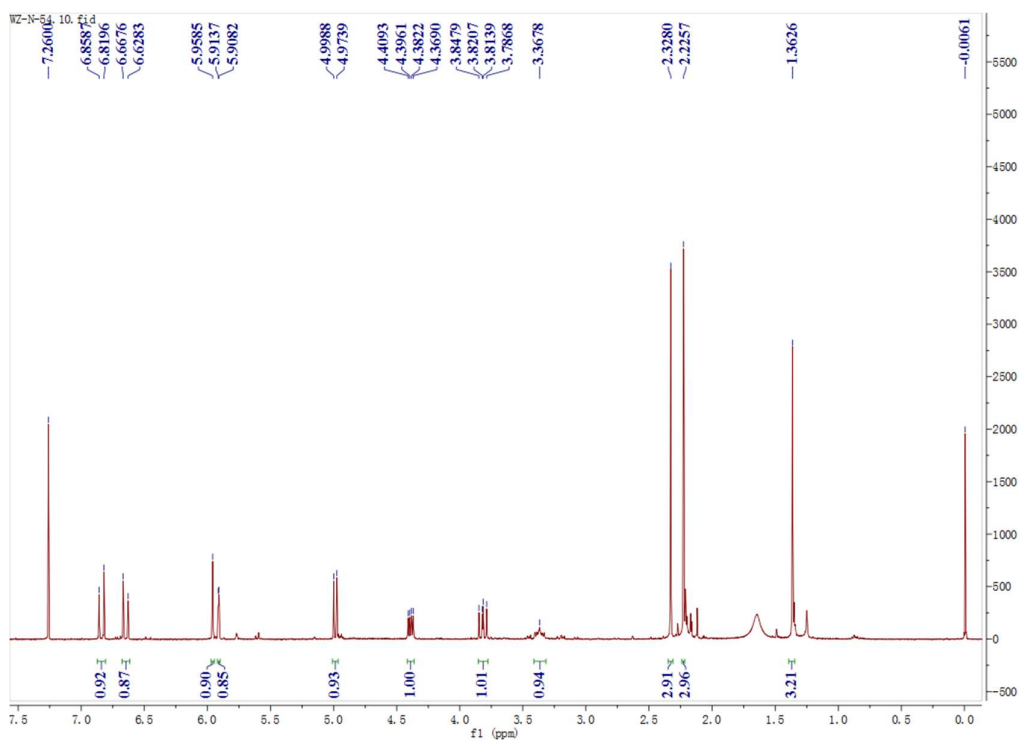

**Figure S80.**  $^{13}\text{C}$  NMR (125 MHz,  $\text{CDCl}_3$ ) spectrum of compound **7**

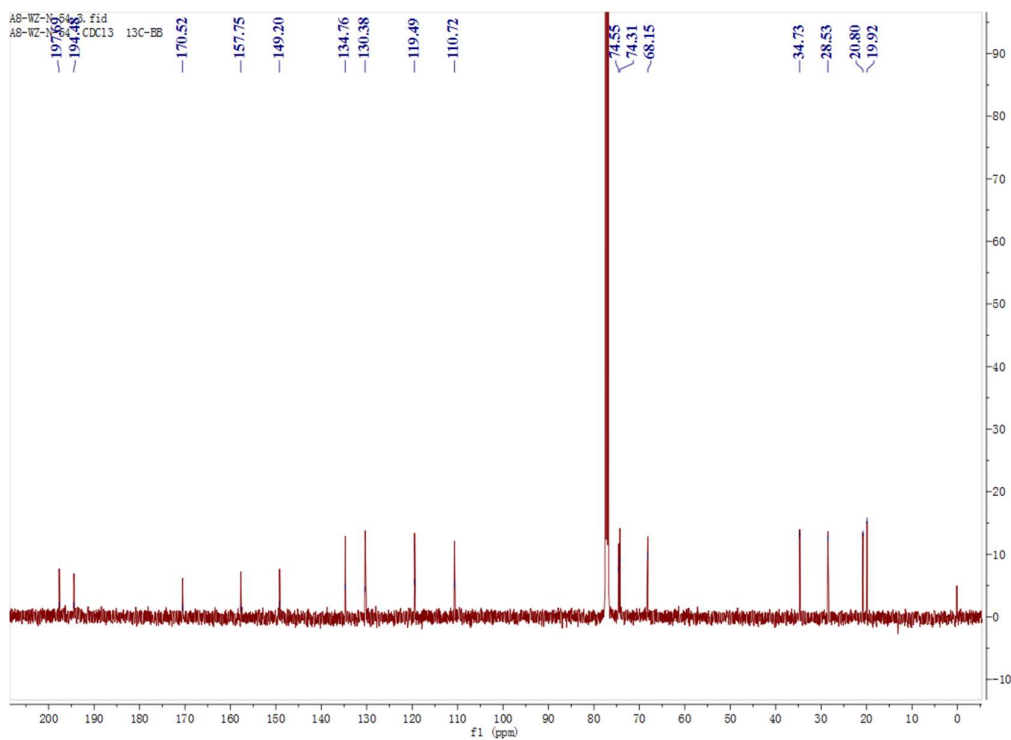

**Figure S81.** DEPT spectrum of compound **7**

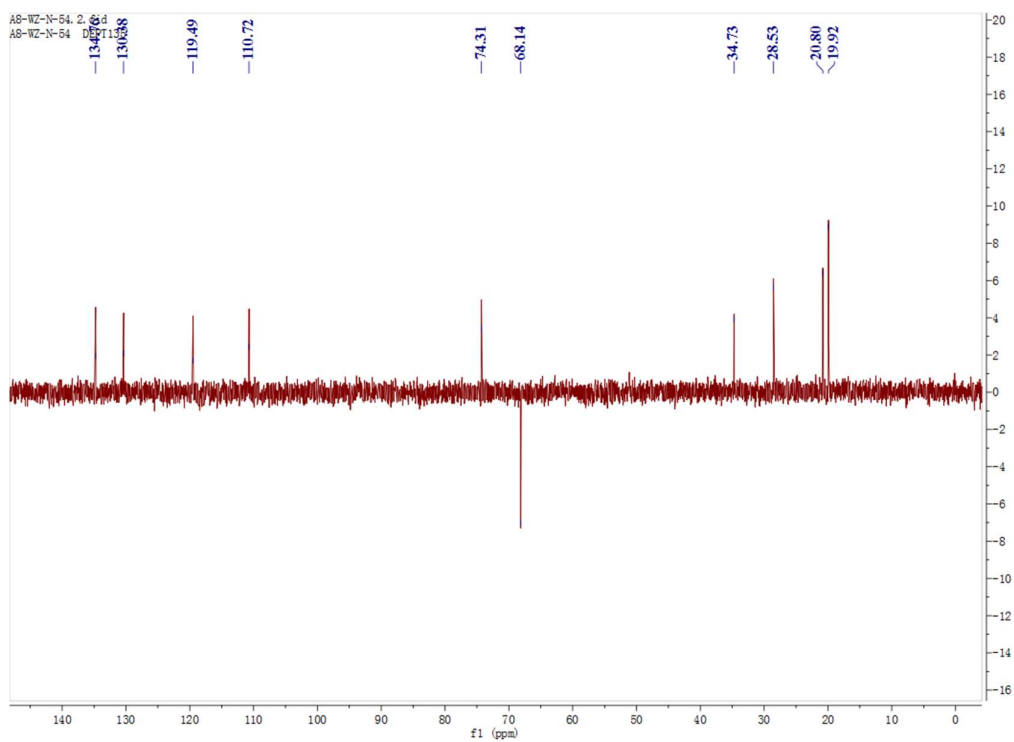

**Figure S82.** HSQC spectrum of compound **7**

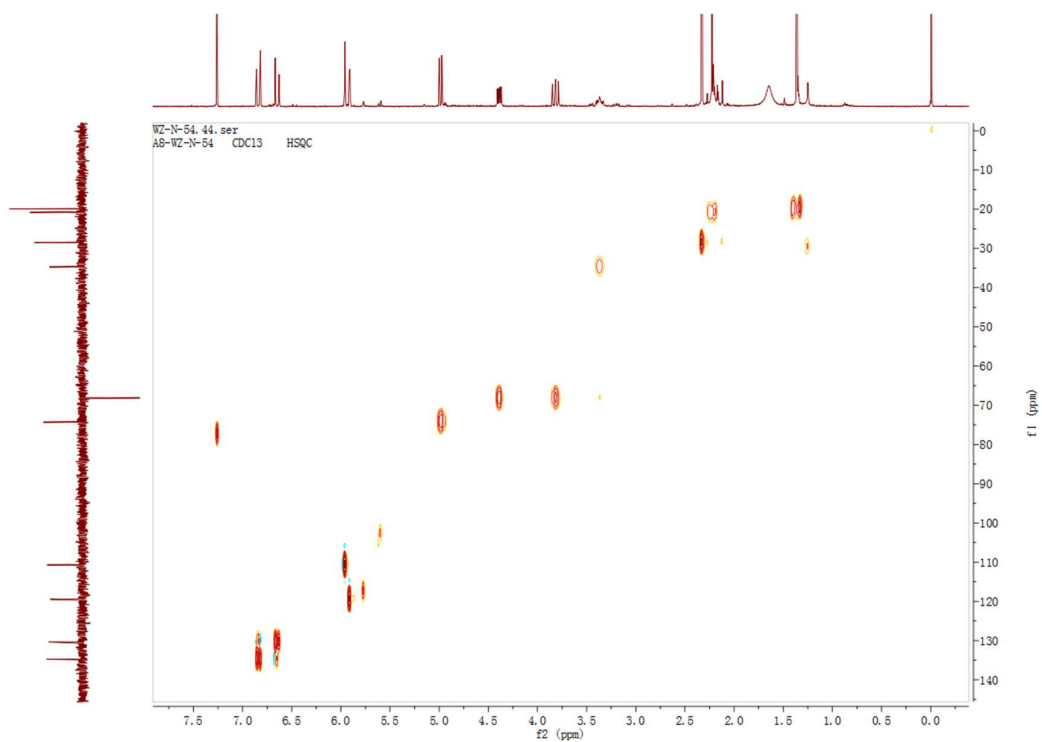

**Figure S83.** HMBC spectrum of compound **7**

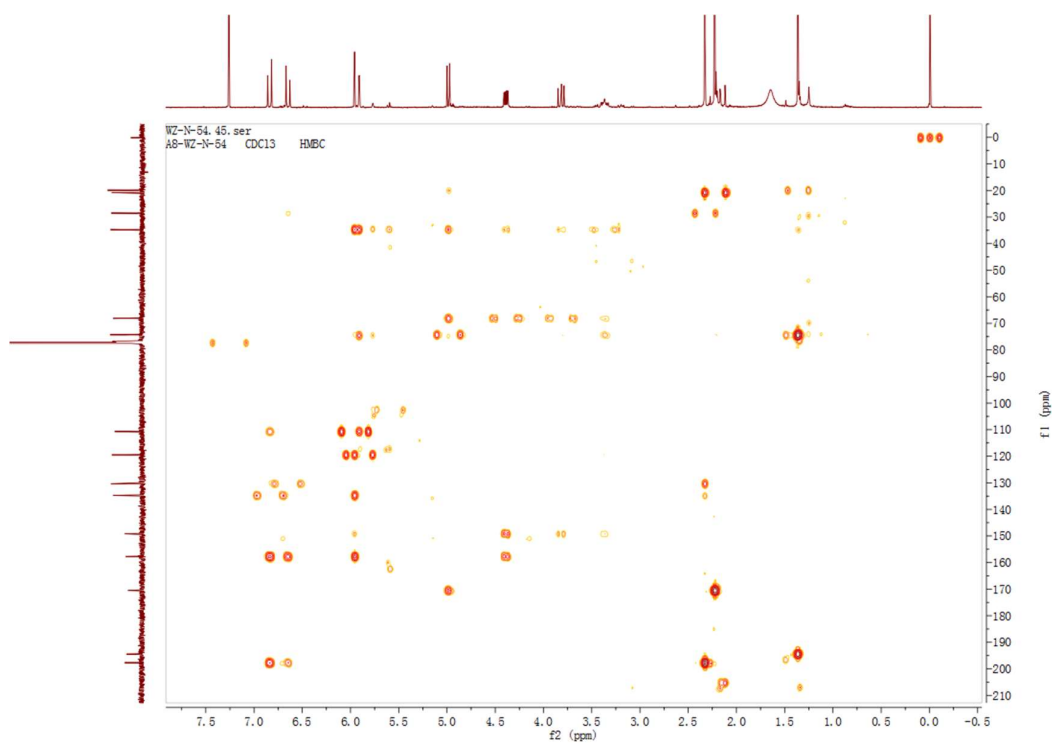

**Figure S84.**  $^1\text{H}$ - $^1\text{H}$  COSY spectrum of compound **7**

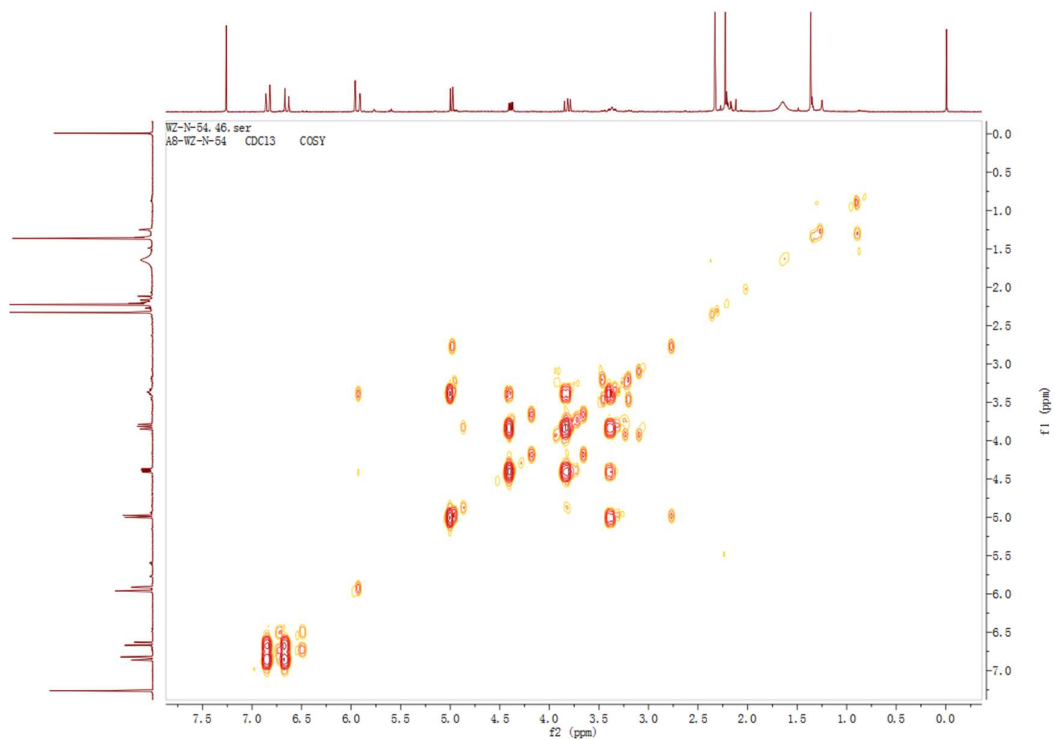



**Figure S85.** NOESY spectrum of compound **7**

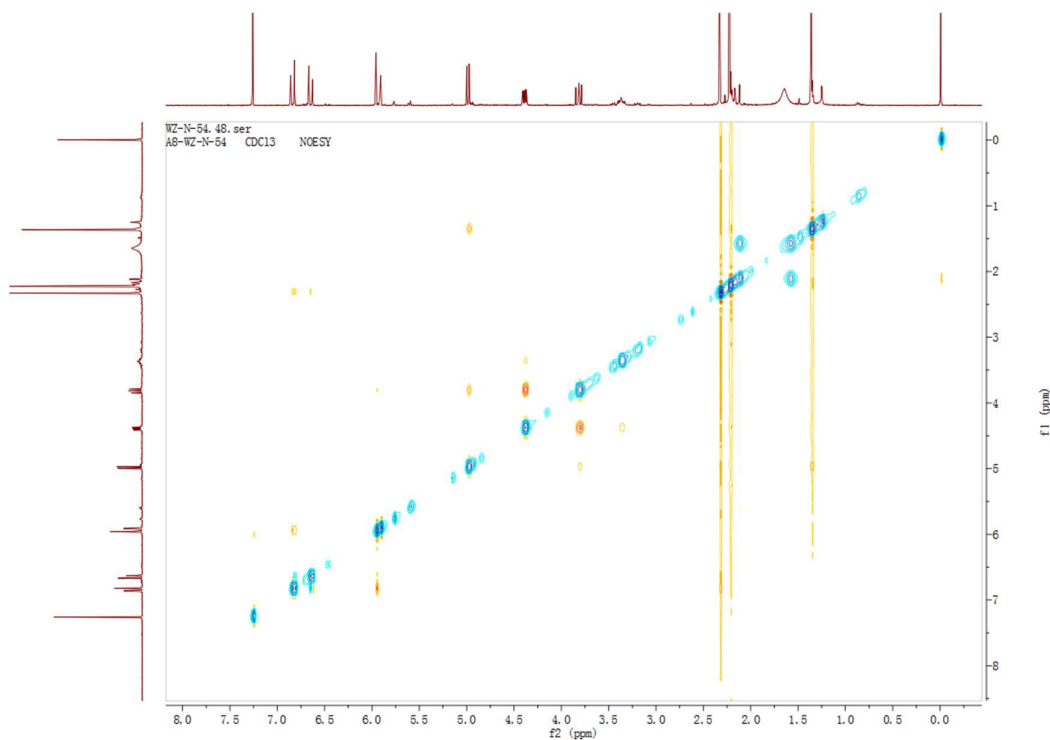

**Figure S86.** HRESIMS spectrum of compound **7**

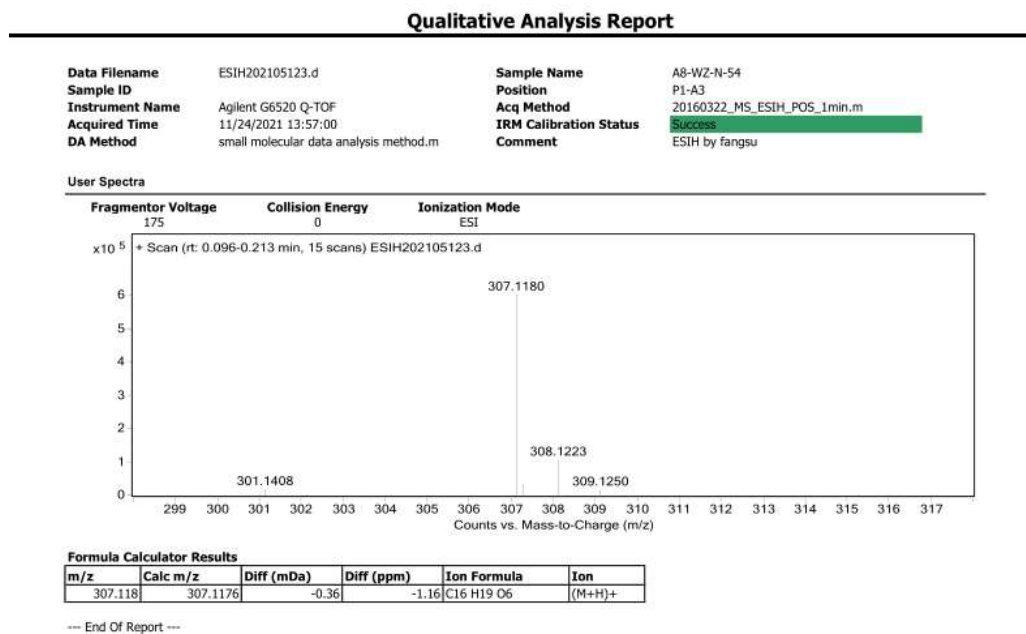

**Figure S87.** UV spectrum of compound 7

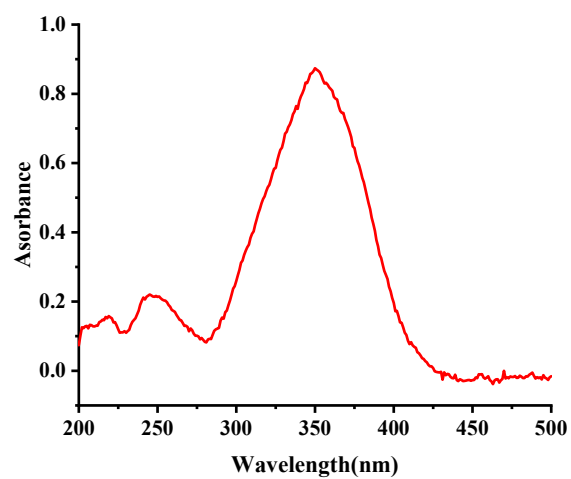

**Figure S88.** IR spectrum of compound 7

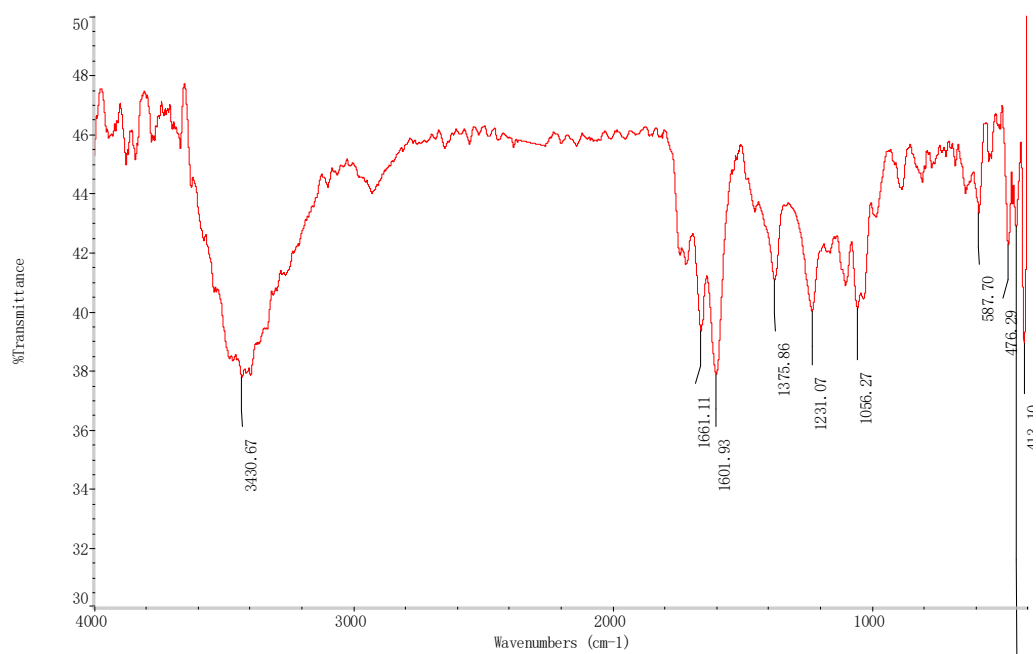

**Figure S89.**  $^1\text{H}$  NMR (600 MHz,  $\text{CDCl}_3$ ) spectrum of compound **8**

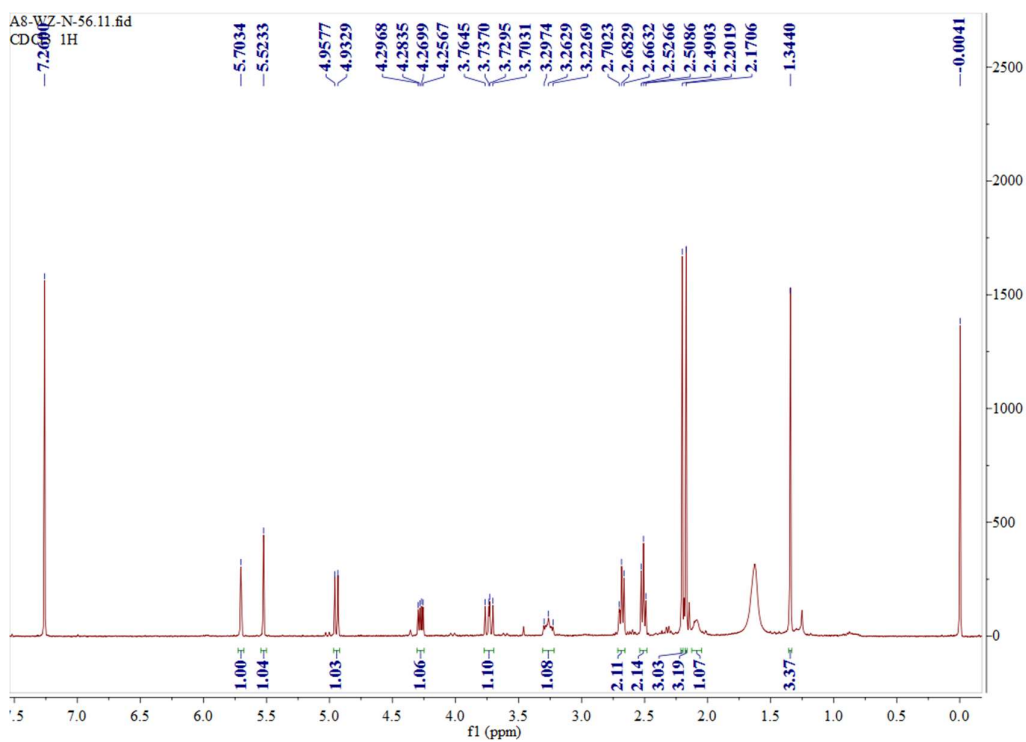

**Figure S90.**  $^{13}\text{C}$  NMR (125 MHz,  $\text{CDCl}_3$ ) spectrum of compound **8**

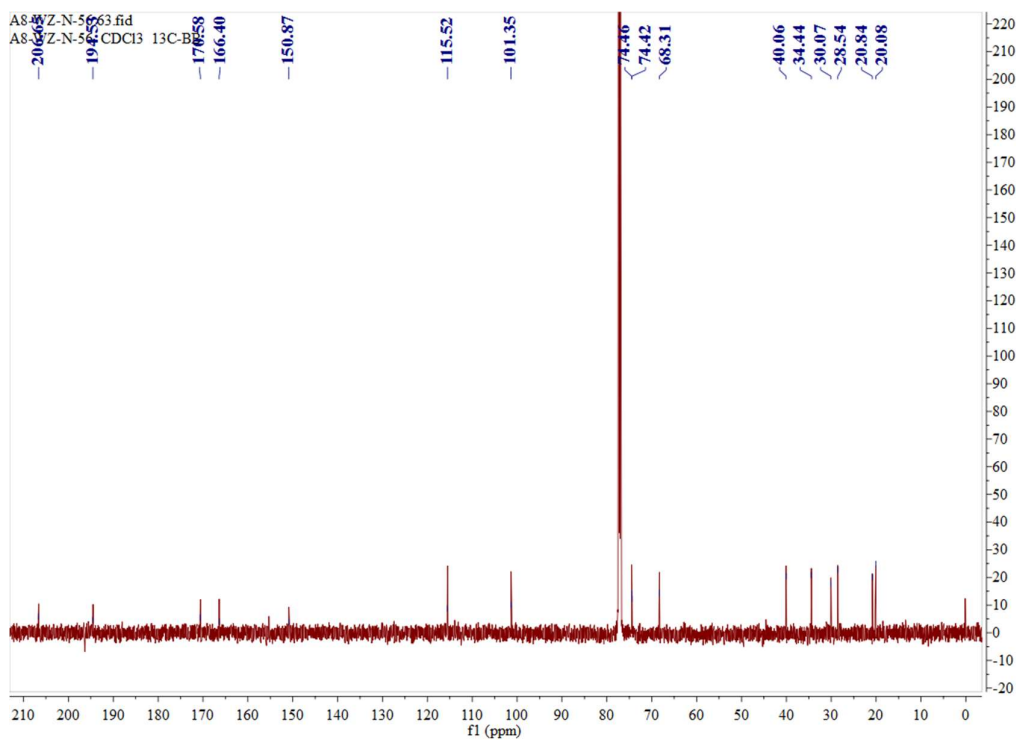

**Figure S91.** DEPT spectrum of compound **8**

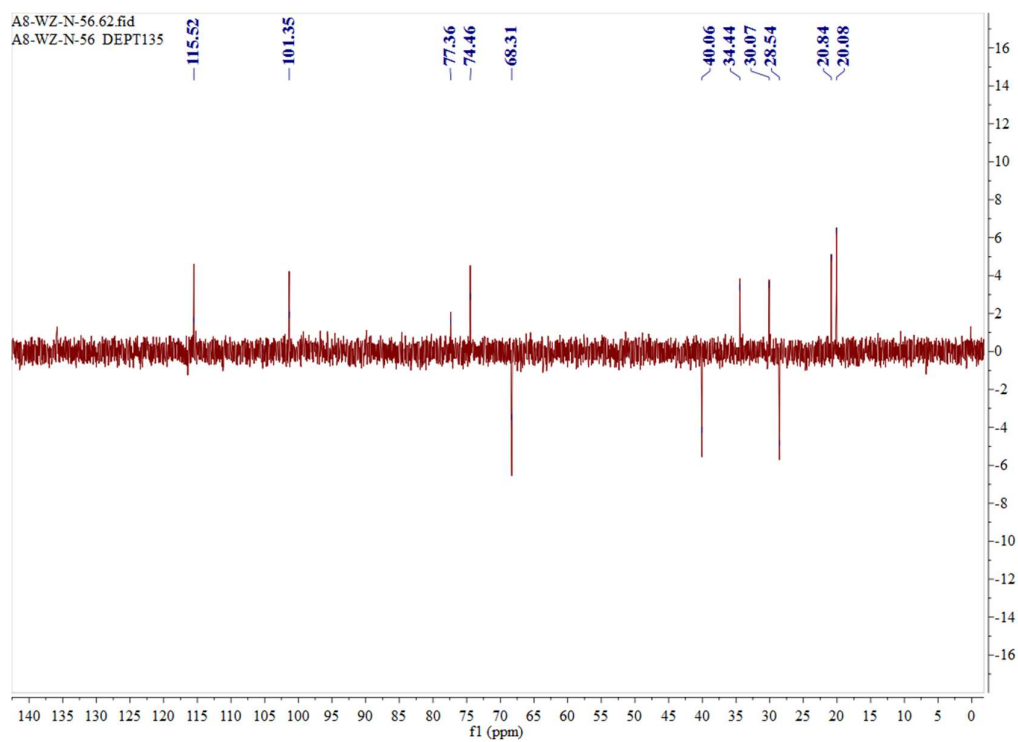

**Figure S92.** HSQC spectrum of compound **8**

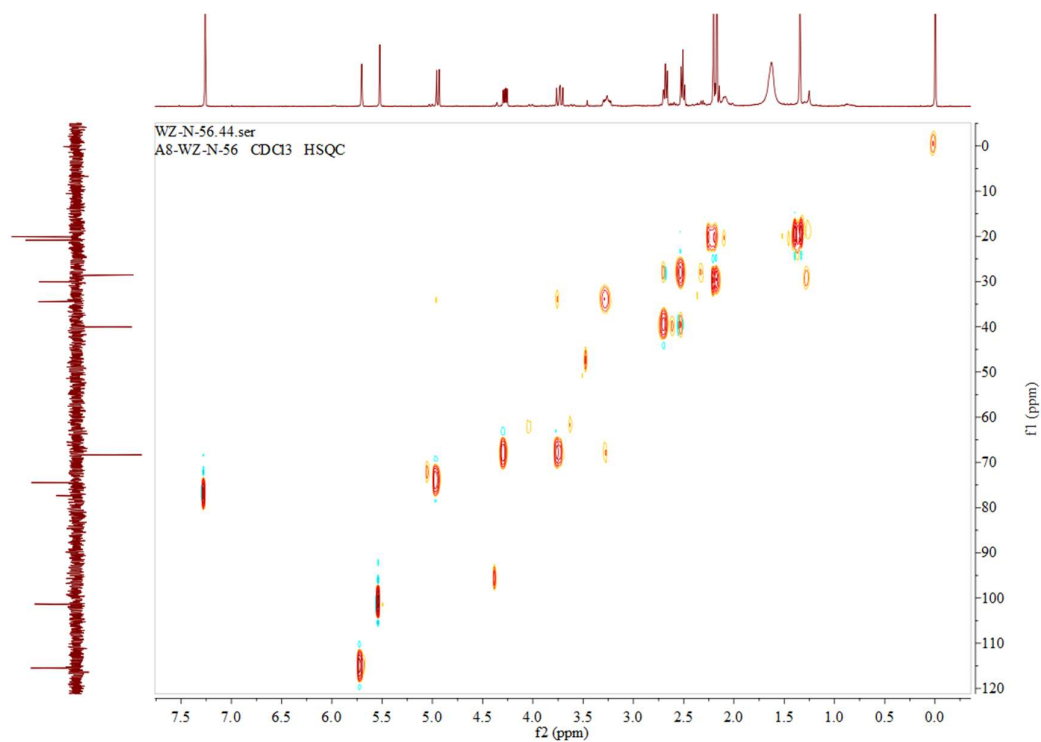

**Figure S93.** HMBC spectrum of compound **8**

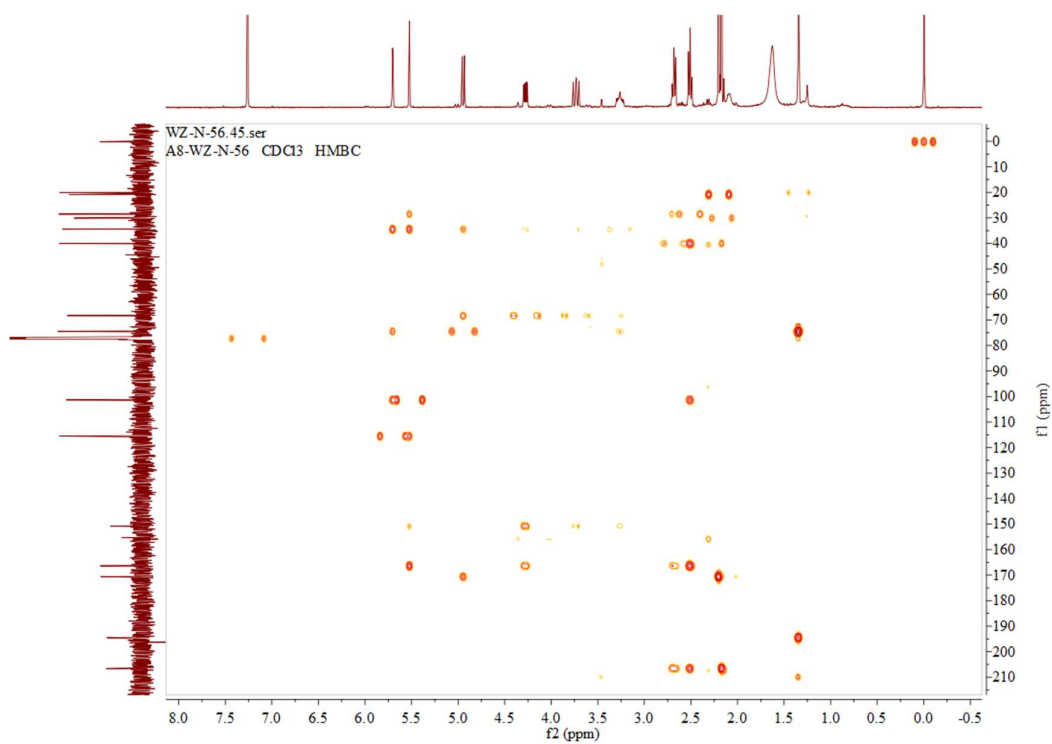

**Figure S94.** <sup>1</sup>H-<sup>1</sup>H COSY spectrum of compound **8**

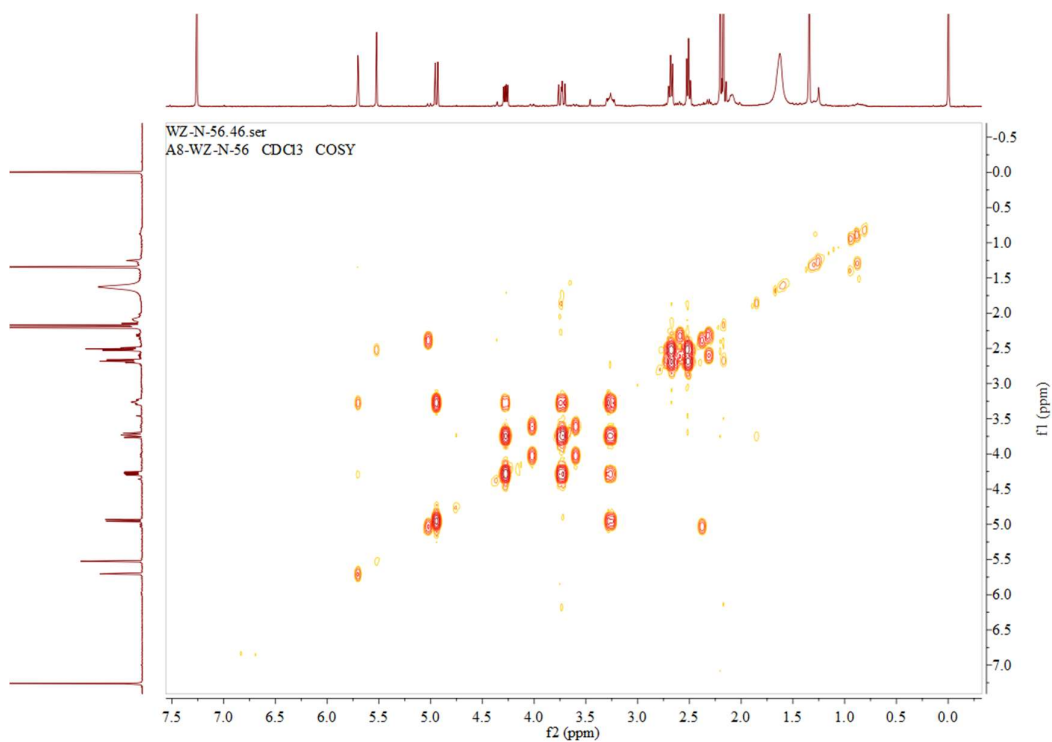

**Figure S95.** NOESY spectrum of compound **8**

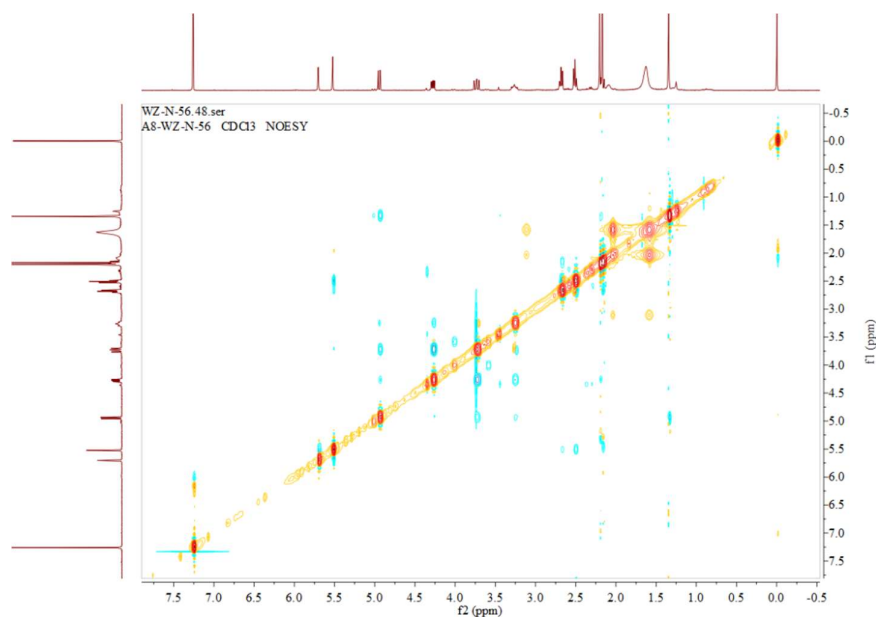

**Figure S96.** HRESIMS spectrum of compound **8**

### Mass Spectrum SmartFormula Report

|                      |                                                           |                                      |               |
|----------------------|-----------------------------------------------------------|--------------------------------------|---------------|
| <b>Analysis Info</b> |                                                           | Acquisition Date 2022-05-17 10:32:19 |               |
| Analysis Name        | D:\Data\A501\WYL\2022\20220517\B502-WZ-N-56_GC3_01_4306.d | Operator                             | Demo User     |
| Method               | lc-ms_as_ms-0.5MIN.m                                      | Instrument                           | compact       |
| Sample Name          | B502-WZ-N-56                                              |                                      | 8255754.20156 |
| Comment              |                                                           |                                      |               |

|                              |            |                      |           |
|------------------------------|------------|----------------------|-----------|
| <b>Acquisition Parameter</b> |            |                      |           |
| Source Type                  | ESI        | Ion Polarity         | Positive  |
| Focus                        | Not active | Set Capillary        | 3500 V    |
| Scan Begin                   | 50 m/z     | Set End Plate Offset | -500 V    |
| Scan End                     | 2500 m/z   | Set Charging Voltage | 2000 V    |
|                              |            | Set Corona           | 0 nA      |
|                              |            | Set Nebulizer        | 1.8 Bar   |
|                              |            | Set Dry Heater       | 220 °C    |
|                              |            | Set Dry Gas          | 4.0 l/min |
|                              |            | Set Divert Valve     | Waste     |
|                              |            | Set APCI Heater      | 0 °C      |

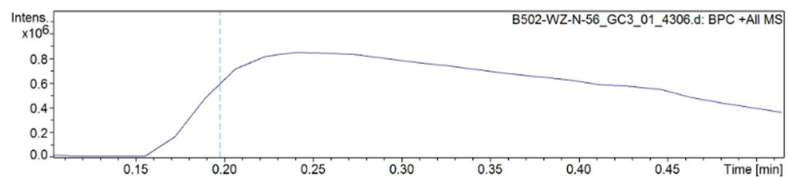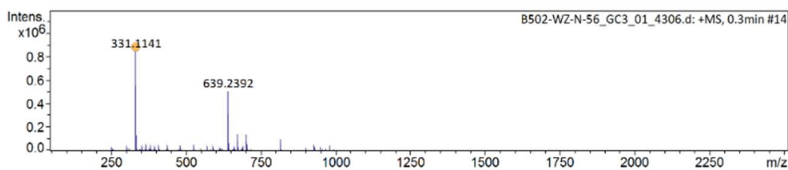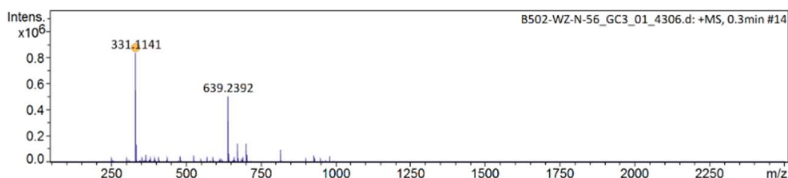

| Meas. m/z | # | Ion Formula                                      | m/z      | err [ppm] | mSigma | # mSigma | Score  | rdb | e <sup>-</sup> Conf | N-Rule | Adduct |
|-----------|---|--------------------------------------------------|----------|-----------|--------|----------|--------|-----|---------------------|--------|--------|
| 331.1141  | 1 | C <sub>16</sub> H <sub>20</sub> NaO <sub>6</sub> | 331.1152 | 3.4       | 4.0    | 1        | 100.00 | 7.0 | even                | ok     | M+Na   |

**Figure S97.** UV spectrum of compound **8**

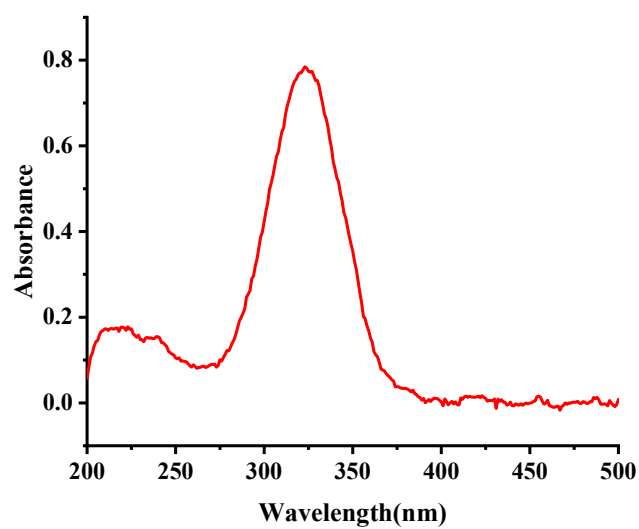

**Figure S98.** IR spectrum of compound **8**

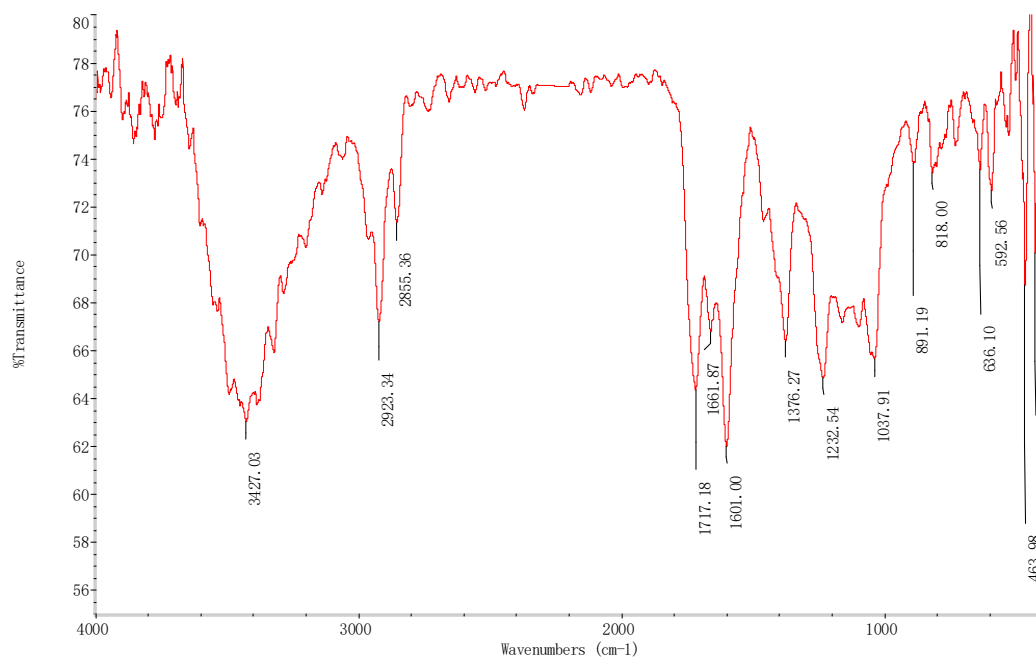

**Figure S99.** <sup>1</sup>H NMR (600 MHz, CDCl<sub>3</sub>) spectrum of compound **9**

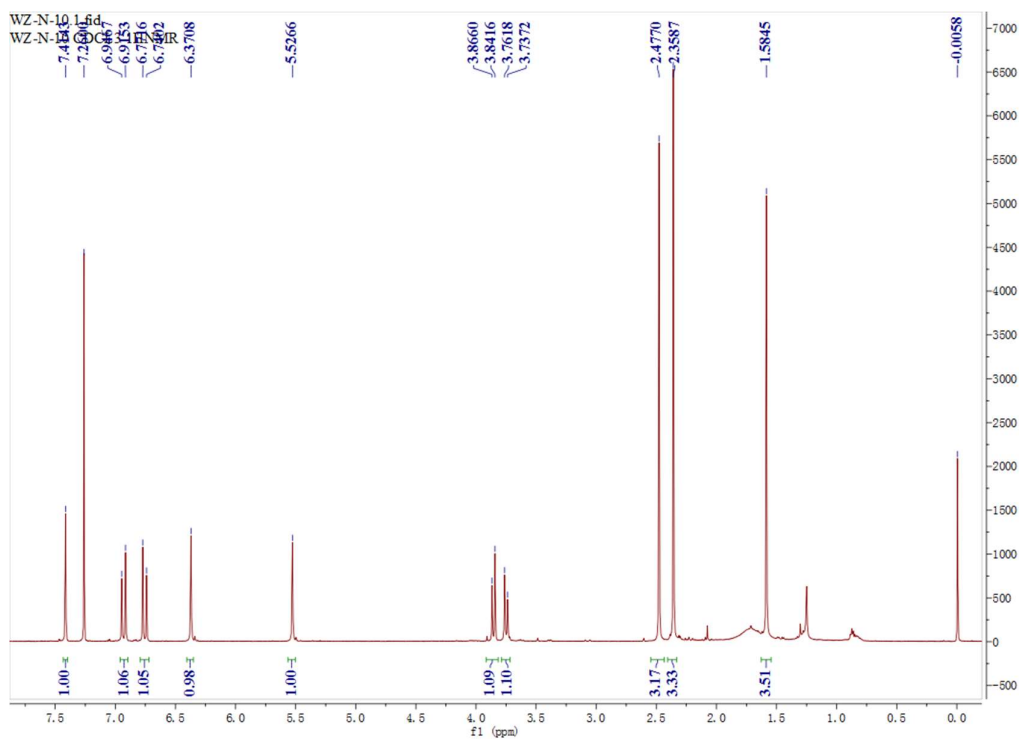

**Figure S100.**  $^{13}\text{C}$  NMR (125 MHz,  $\text{CDCl}_3$ ) spectrum of compound **9**

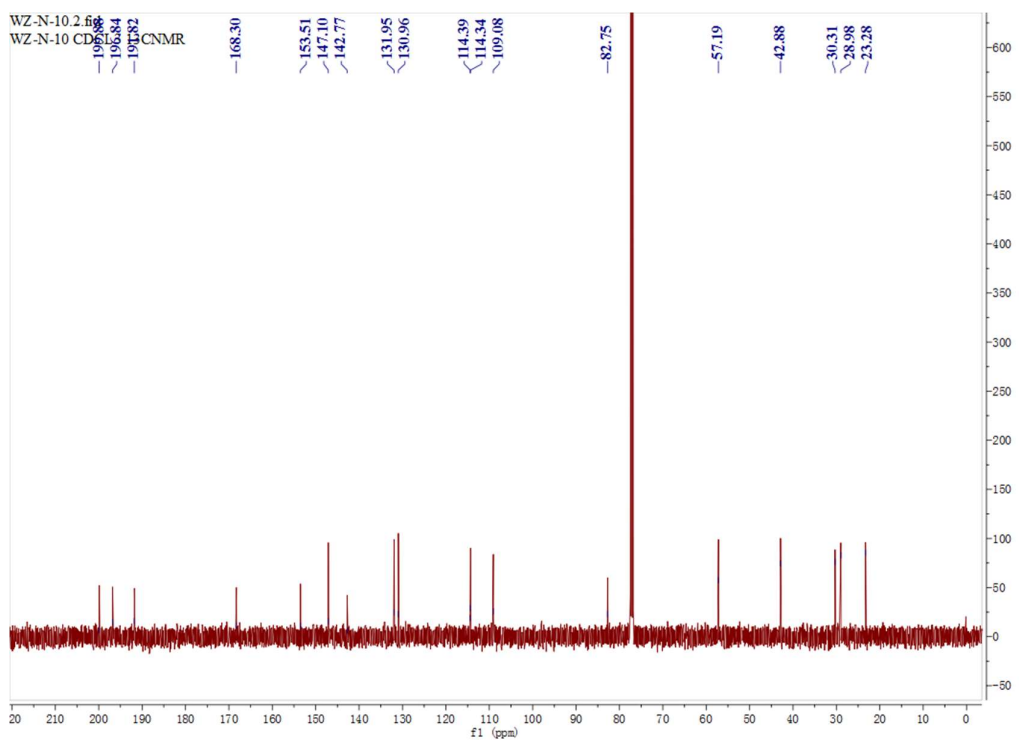

**Figure S101.** DEPT spectrum of compound **9**



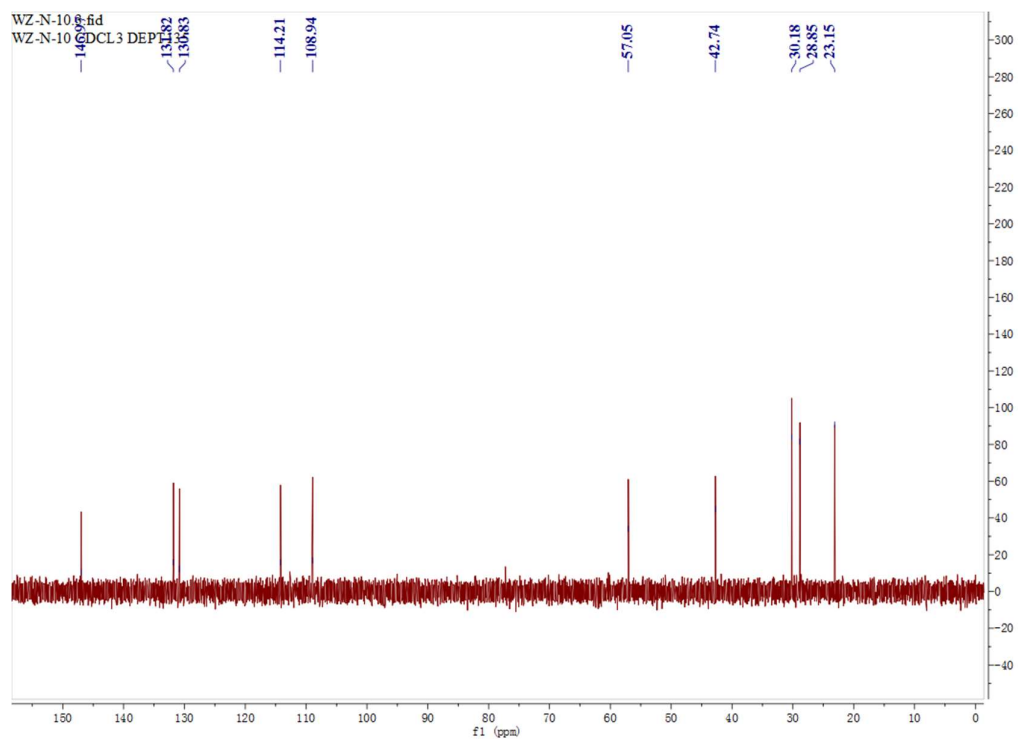

**Figure S102.** HSQC spectrum of compound **9**

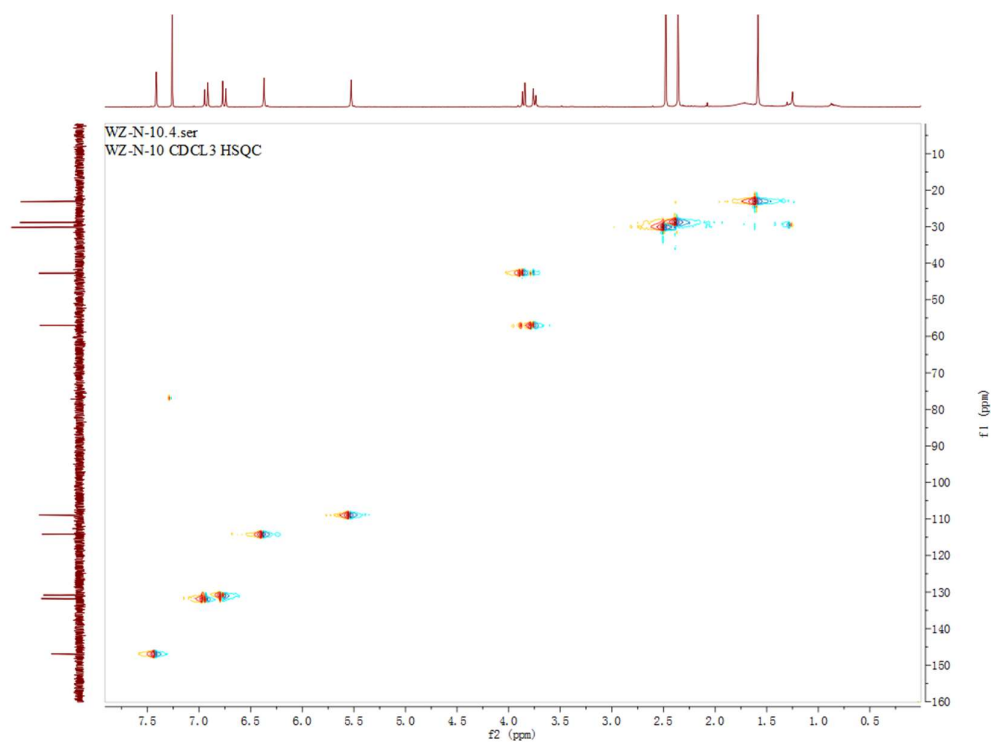

**Figure S103.** HMBC spectrum of compound **9**

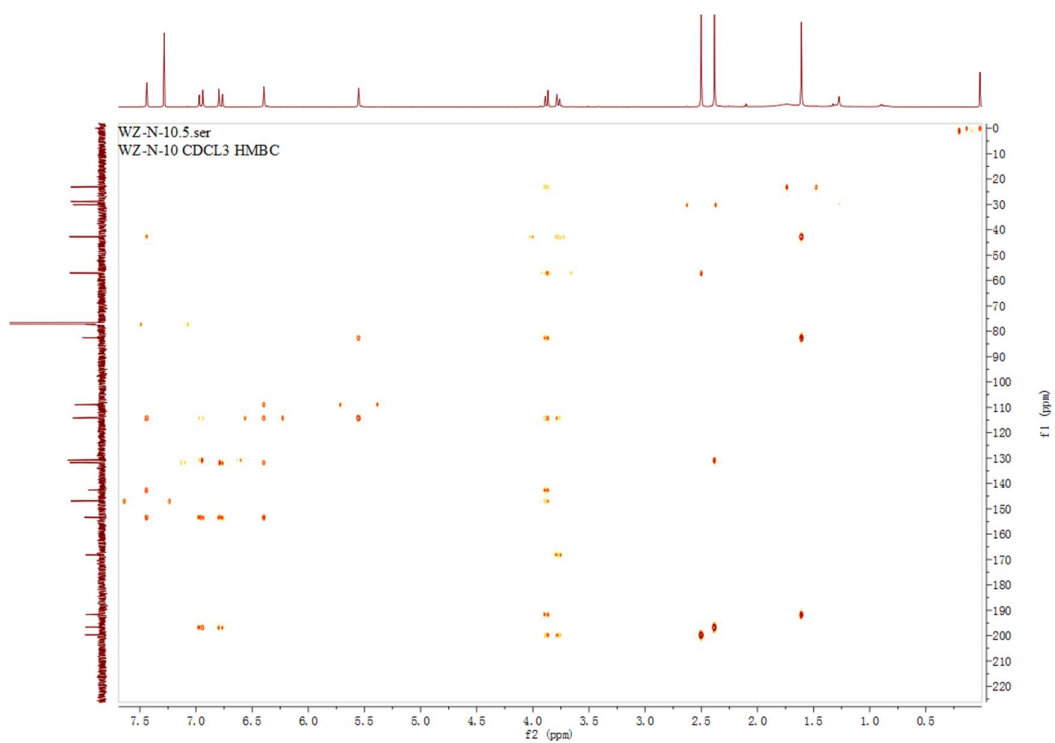

**Figure S104.**  $^1\text{H}$ - $^1\text{H}$  COSY spectrum of compound **9**

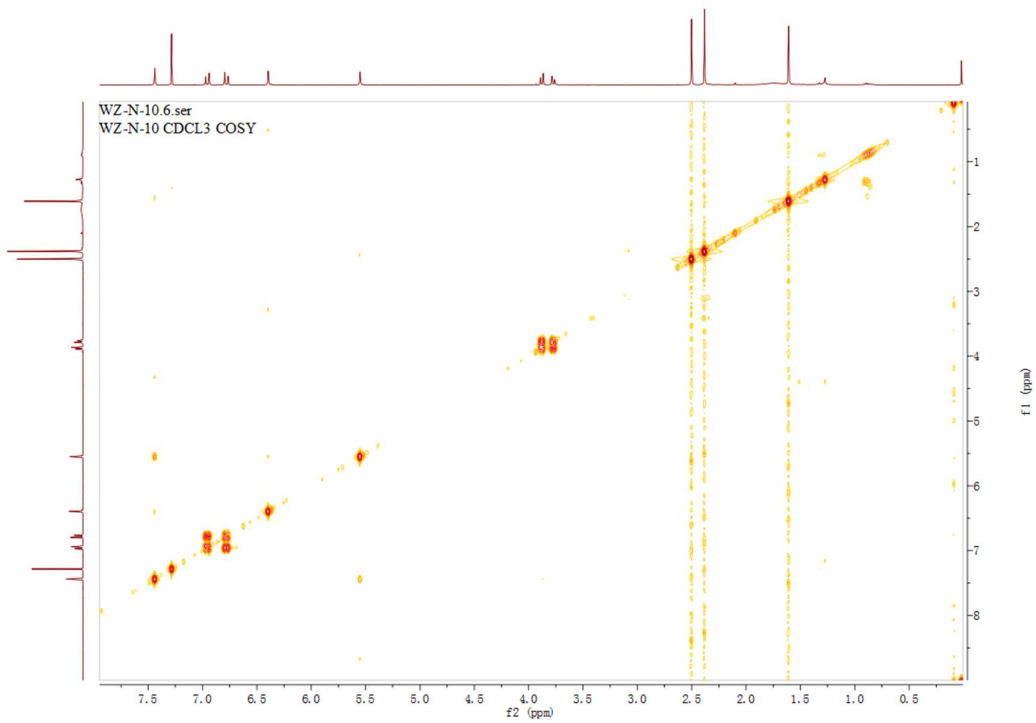

**Figure S105.** NOESY spectrum of compound **9**

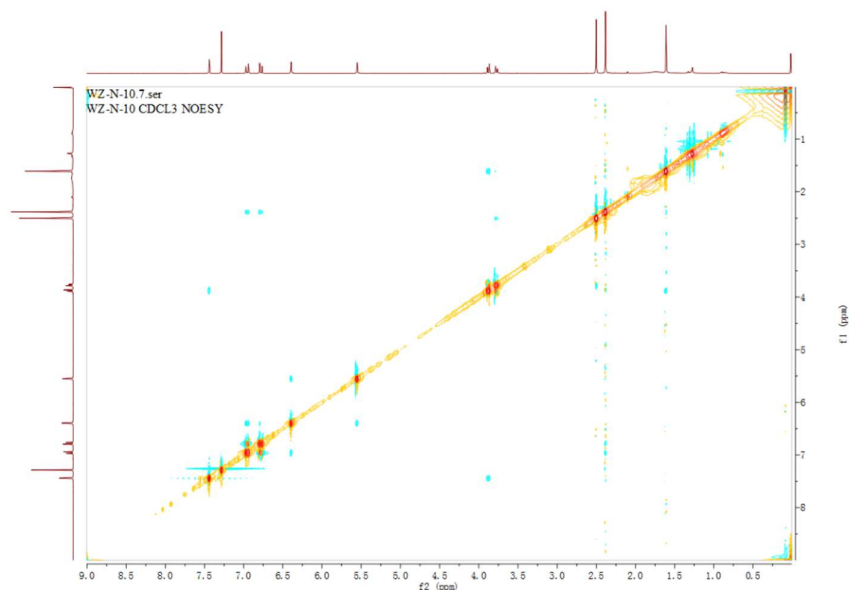

**Figure S106.** HRESIMS spectrum of compound **9**

### Mass Spectrum SmartFormula Report

|                      |                                                           |                                      |               |
|----------------------|-----------------------------------------------------------|--------------------------------------|---------------|
| <b>Analysis Info</b> |                                                           | Acquisition Date 2022-05-17 10:23:47 |               |
| Analysis Name        | D:\Data\A501\WYL\2022\20220517\B502-WZ-N-10_GB8_01_4303.d | Operator                             | Demo User     |
| Method               | lc-ms_as_ms-0.5MIN.m                                      | Instrument                           | compact       |
| Sample Name          | B502-WZ-N-10                                              |                                      | 8255754.20156 |
| Comment              |                                                           |                                      |               |

|                              |            |                      |           |
|------------------------------|------------|----------------------|-----------|
| <b>Acquisition Parameter</b> |            |                      |           |
| Source Type                  | ESI        | Ion Polarity         | Positive  |
| Focus                        | Not active | Set Capillary        | 3500 V    |
| Scan Begin                   | 50 m/z     | Set End Plate Offset | -500 V    |
| Scan End                     | 2500 m/z   | Set Charging Voltage | 2000 V    |
|                              |            | Set Corona           | 0 nA      |
|                              |            | Set Nebulizer        | 1.8 Bar   |
|                              |            | Set Dry Heater       | 220 °C    |
|                              |            | Set Dry Gas          | 4.0 l/min |
|                              |            | Set Divert Valve     | Waste     |
|                              |            | Set APCI Heater      | 0 °C      |

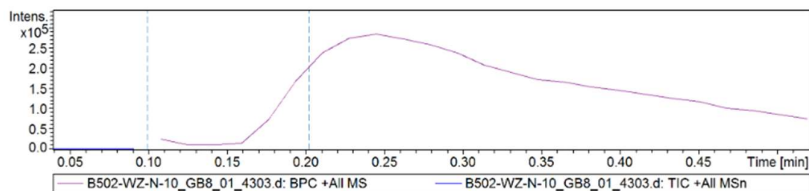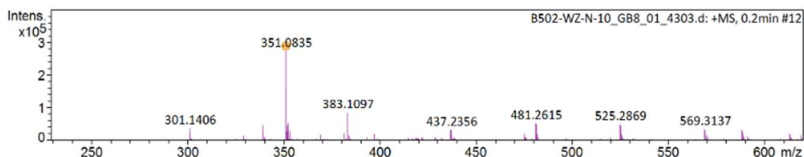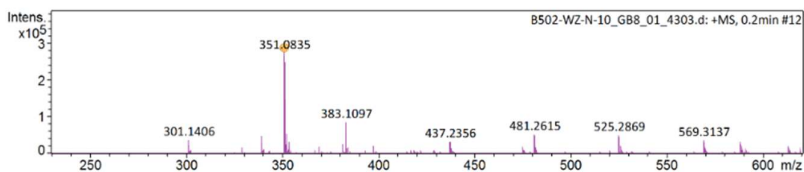

| Meas. m/z | # | Ion Formula | m/z      | err [ppm] | mSigma | # mSigma | Score  | rdb  | e <sup>-</sup> Conf | N-Rule | Adduct |
|-----------|---|-------------|----------|-----------|--------|----------|--------|------|---------------------|--------|--------|
| 351.0835  | 1 | C18H16NaO6  | 351.0839 | 1.0       | 1.0    | 1        | 100.00 | 11.0 | even                | ok     | M+Na   |

**Figure S107.** UV spectrum of compound **9**

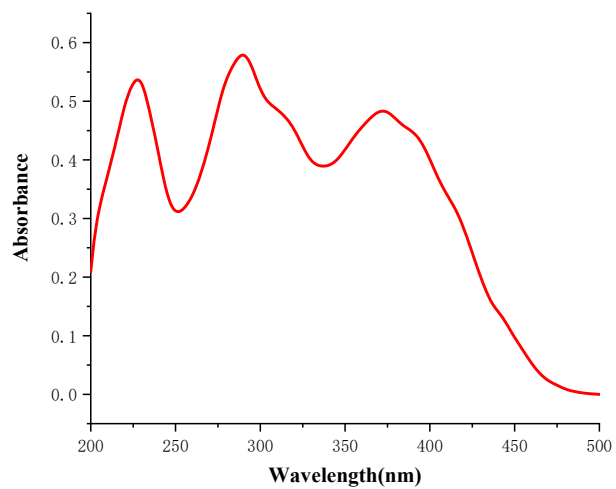

**Figure S108.** IR spectrum of compound **9**

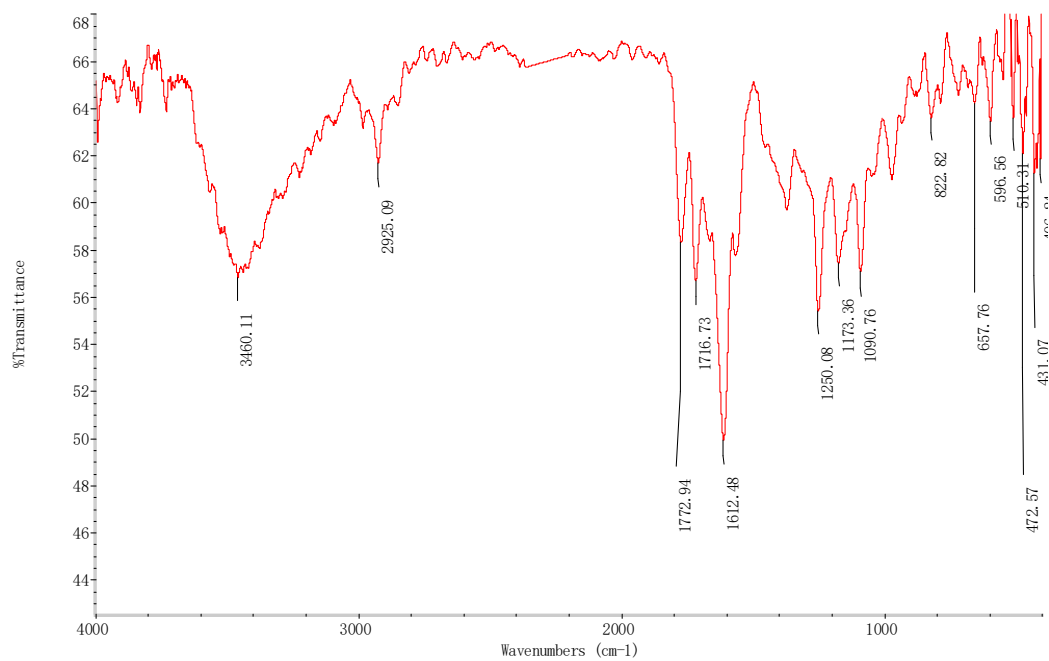

Supplement: s1 [file s1]
